# Supplementary material
Source: PubMed Central journal article supplement (PMC5860854)
Supplement: DB171114SupplementaryData.pdf [file DB171114SupplementaryData.pdf]

SUPPLEMENTARY DATA

**Supplementary Figure. S1. T-cells or endothelial cells are not proliferating within islets. (a)** Lymphocytes or **(b-c)** islet images for control pancreata stained for DAPI (blue), CD3 (green), CD31 (green) and Ki67 (red) reveal that proliferating cells are not T-cells or endothelial cells as indicated by **(a-b)** CD3 or **(c)** CD31, respectively; **(a)** CD3+ lymphocytes indicate a positive control for CD3 staining. Scale bar: 100µm.

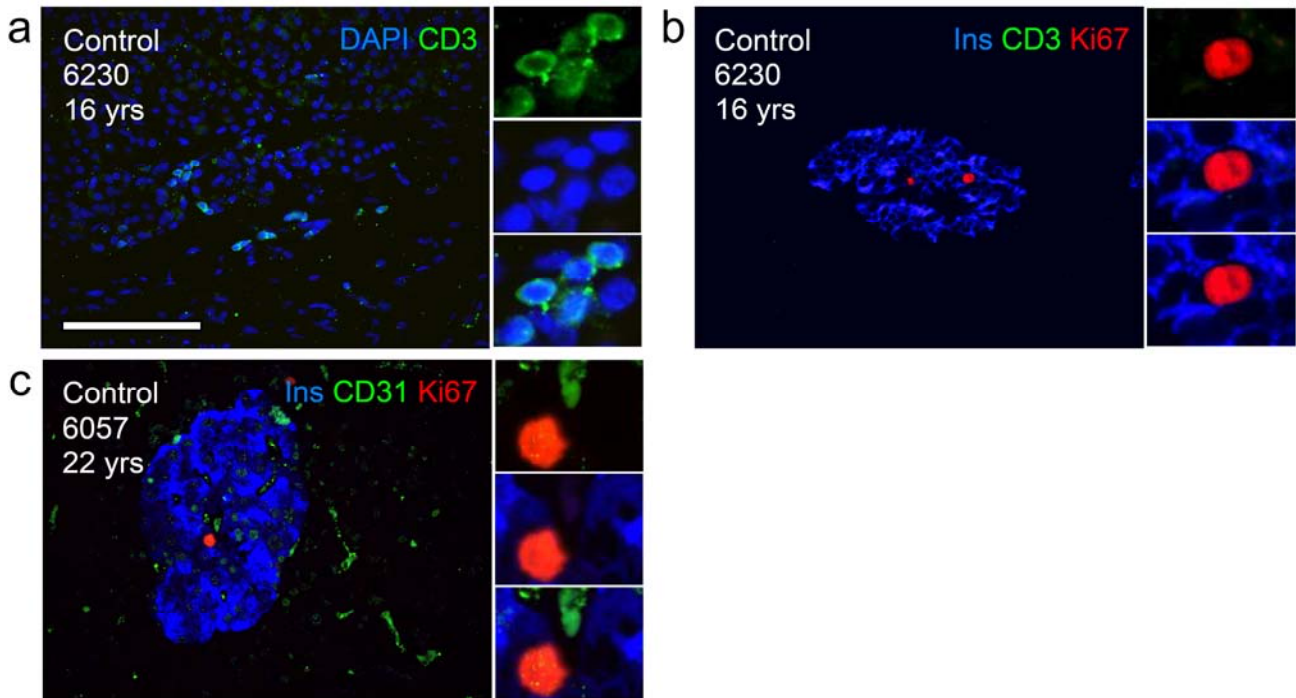

SUPPLEMENTARY DATA

**Supplementary Figure. S2. Proliferating islet endocrine cells verified by multiple proliferative markers.** Islet images for (a, c) control and (b, d) T1D stained for DAPI (blue), synaptophysin (Syn; green) and proliferative markers (red). Proliferating islet endocrine cells (c-d) Syn+ pHH3+ and (c-d) Syn+ PCNA+ cells found in both control and T1D islets.

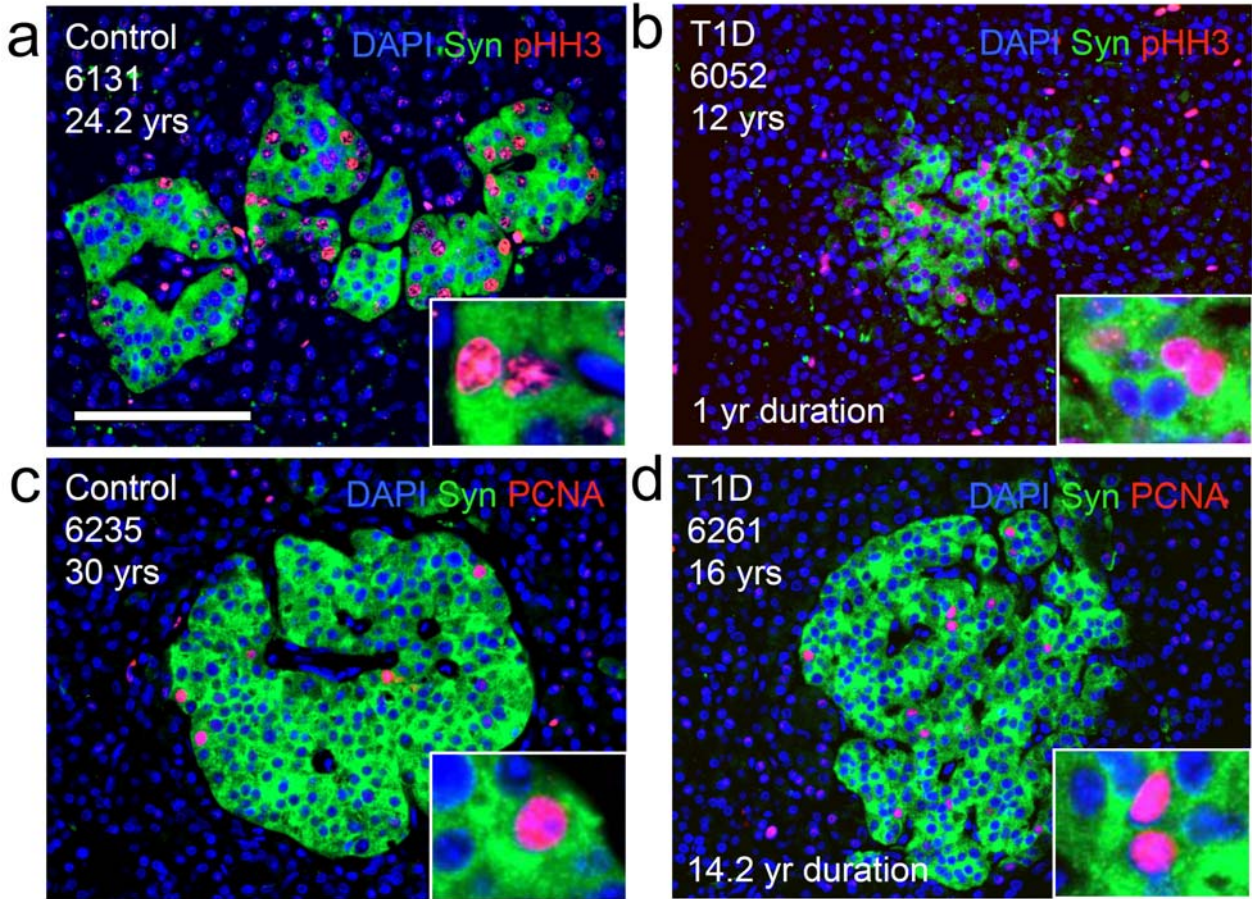

SUPPLEMENTARY DATA

**Supplementary Figure. S3. Islet endocrine cell proliferation is consistent across different regions of the pancreas.** (a-d) Representative islet images for control pancreata stained for DAPI (blue), synaptophysin (Syn; green), and Ki67 (red) demonstrate similar proliferation rates in head and tail regions of the pancreas. (e) Correlation analysis of islet cell proliferation measured as % total confirm similar rates of islet cell proliferation in the differing regions of the pancreas.

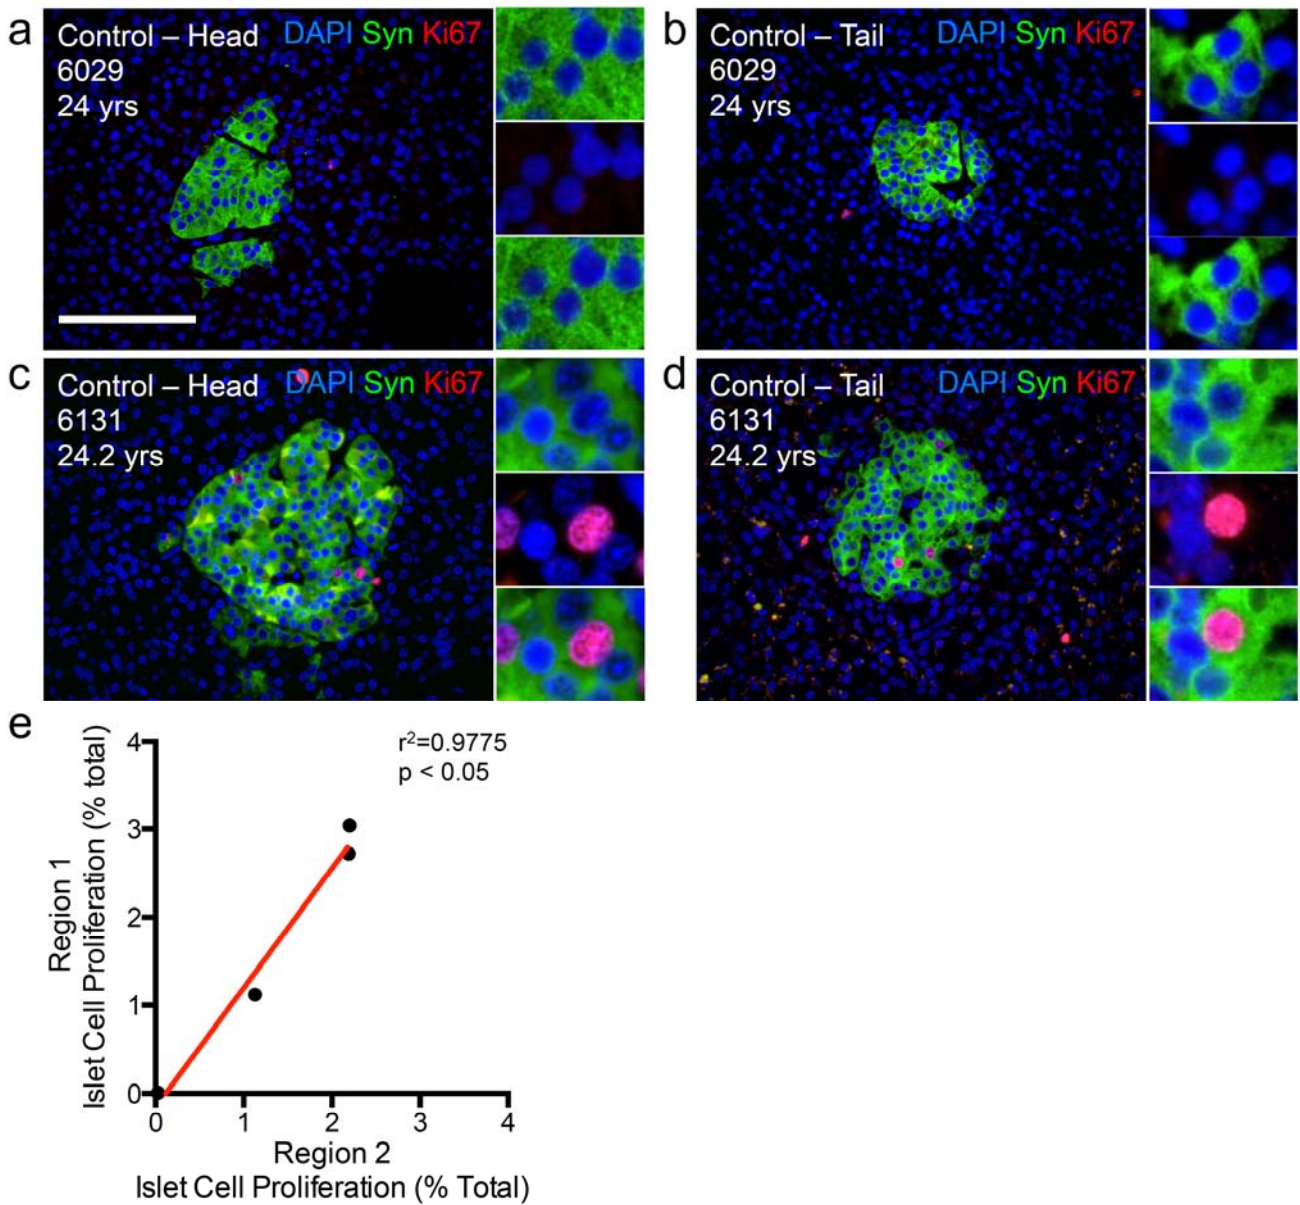

## SUPPLEMENTARY DATA

**Supplementary Fig. S4. Duration of ICU stay and pancreas transit time are not associated with islet endocrine cell or  $\alpha$ -cell proliferation. (a-d)** Duration of ICU stay (days) v. **(a-b)** islet cell proliferation (% total) or **(c-d)**  $\alpha$ -cell proliferation (% total) for **(a,c)** control and **(b,d)** T1D pancreata. **(e-h)** Pancreas transit time (h) v. **(e-f)** islet cell proliferation (% total) or **(g-h)**  $\alpha$ -cell proliferation (% total) for **(e, g)** control and **(f, h)** T1D pancreata.



SUPPLEMENTARY DATA

Infants to Older Adults

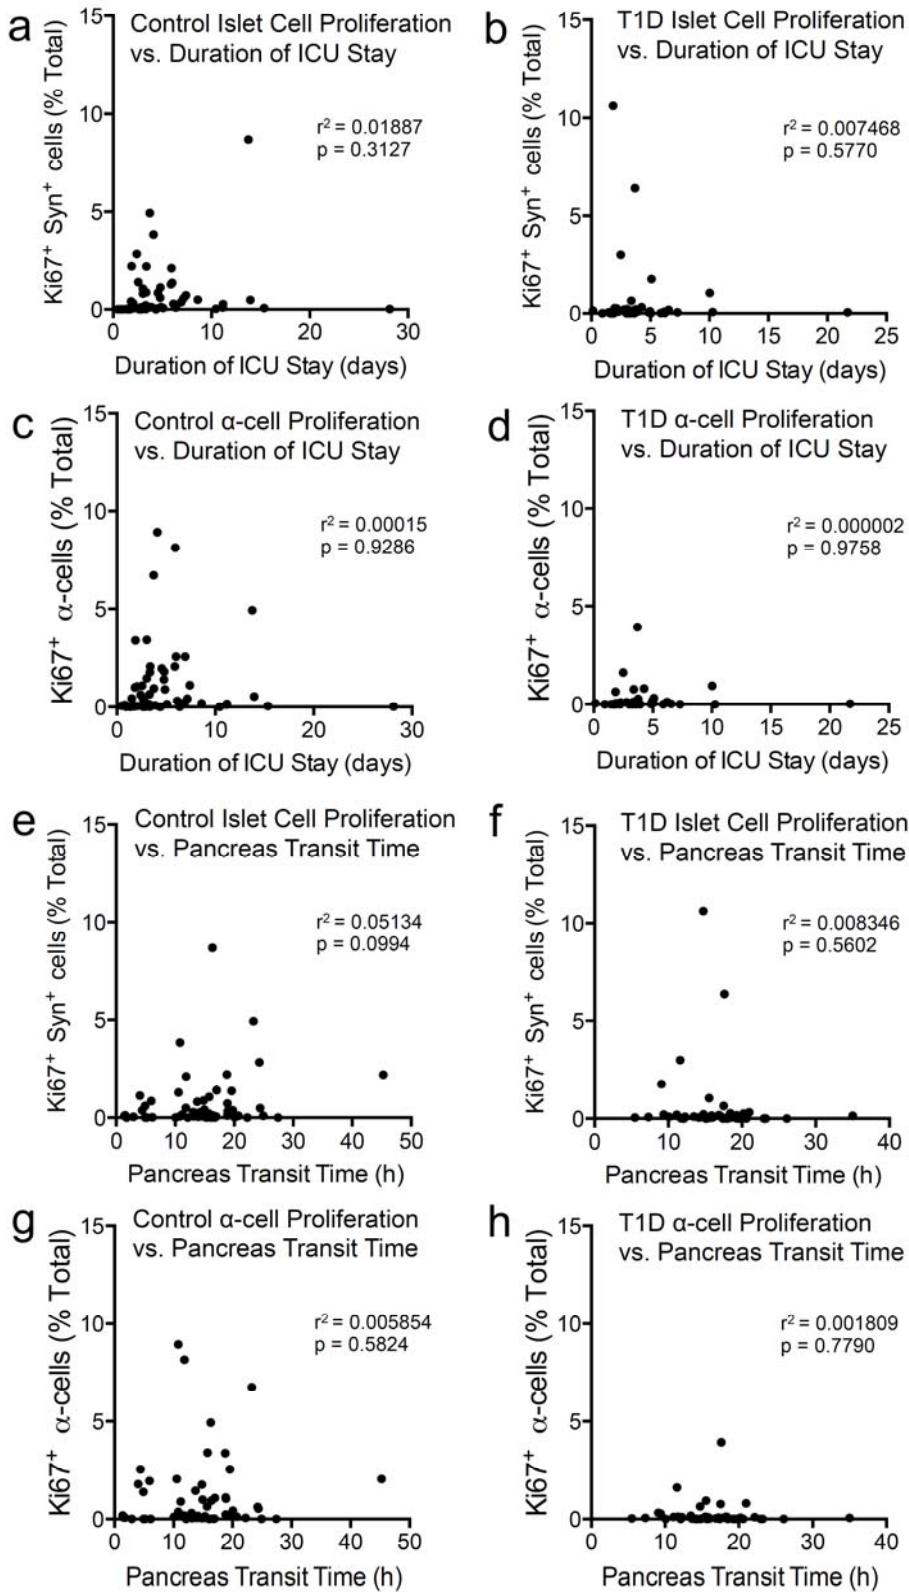

SUPPLEMENTARY DATA

**Supplementary Figure. S5. Proliferating islet endocrine Sox9<sup>Cyt</sup> cells verified by multiple proliferative markers.** Islet images of (a, c, e, g) control and (b, d, f) T1D stained for DAPI (blue), Sox9 (green), and proliferative markers (PCNA/Ki67; red). Proliferating Sox9<sup>Cyt</sup> cells are verified by (a-b) Sox9<sup>Cyt</sup>+ PCNA+ and (c-f) Sox9<sup>Cyt</sup>+ Ki67+ cells found in (a, c, e) control and (b, d, f) T1D islets. (e-f) Ki67+ Sox9<sup>Cyt</sup>+ cells are not associated with pancreatic ducts (d, white dashed lines). (g) Nuclear Sox9 in ducts. Sox9<sup>Cyt</sup>+ cells are not associated with pancreatic ducts, as detected by CK-19 (green). Scale bar: 100µm.

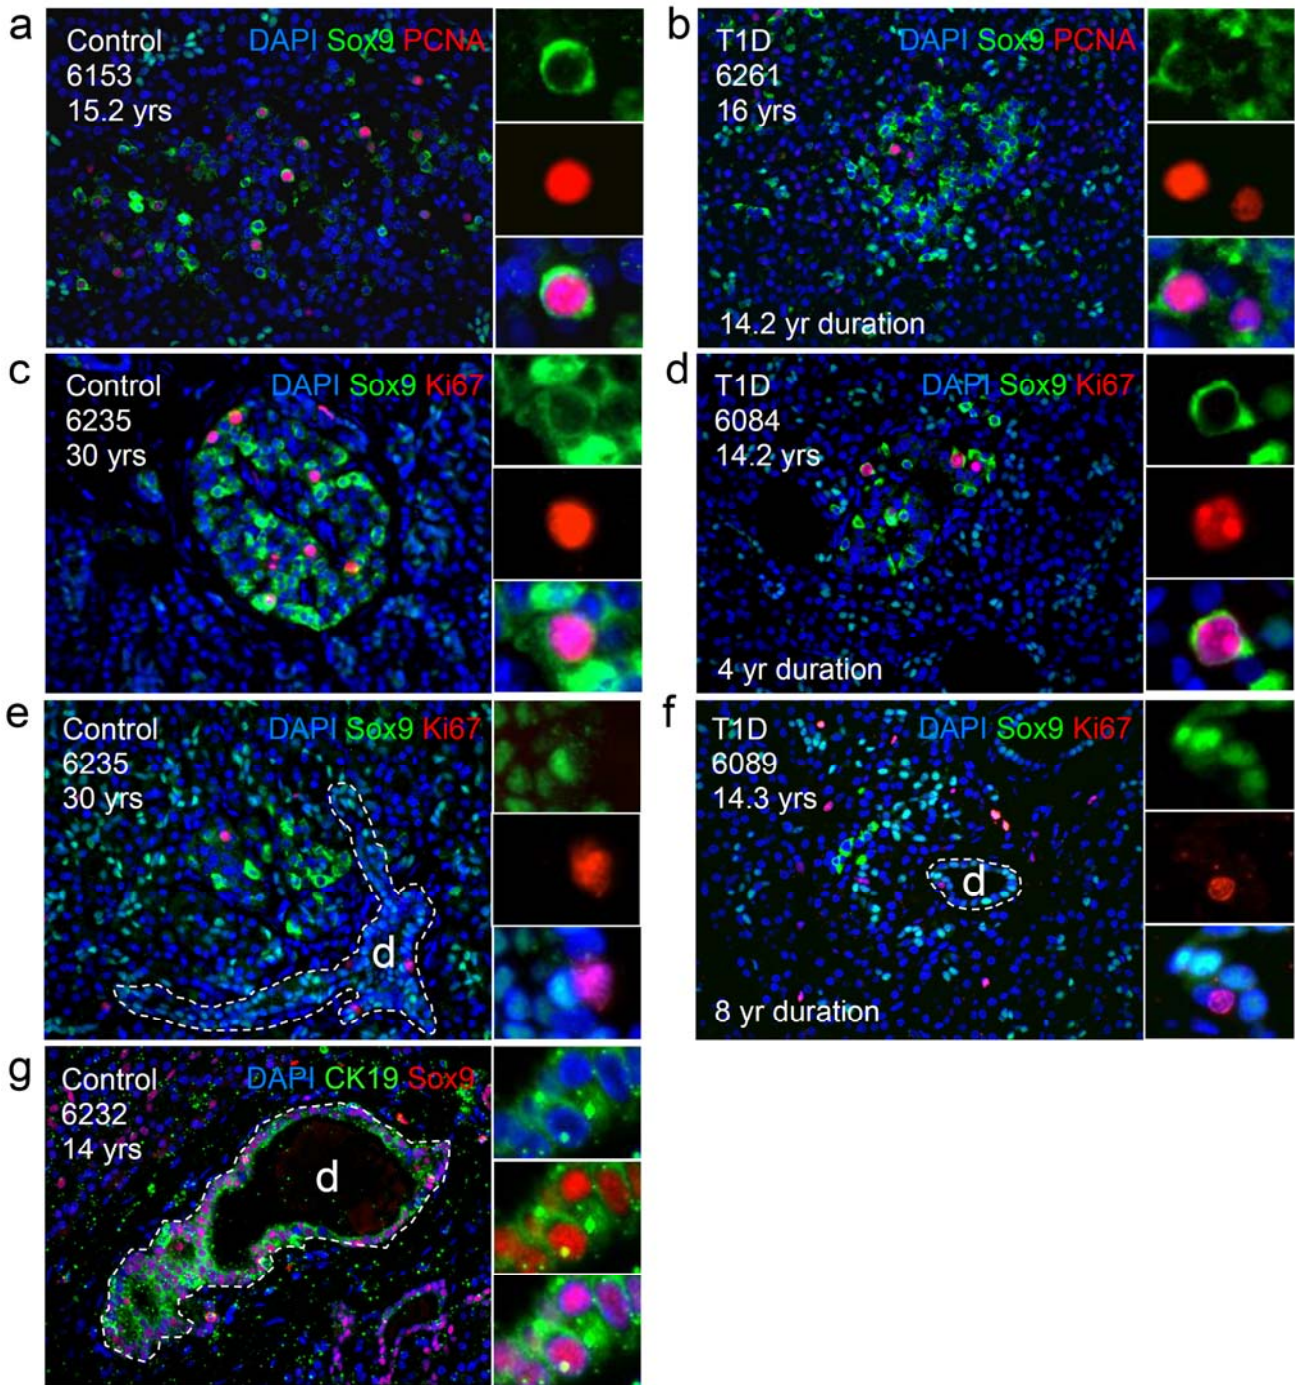



SUPPLEMENTARY DATA

**Supplementary Figure. S6. Sox9<sup>Cyt</sup> cells detected by Sox9 (pS181) antibody.** Islet and ductal images of (a, c, e, g) control and (b, d, f, h) T1D samples – stained for DAPI (blue), Sox9 (pS181)s (green), Ki67 (red) and  $\alpha$ -cell markers, ARX (red; blue) and glucagon (Gcg; red). (a-f) pSox9<sup>Cyt</sup> intraislet cells express ARX, variable amounts of glucagon, and Ki67. (g-h) Ductal cells contain occasional pSox9<sup>Cyt</sup> cells. Scale bar: 100 $\mu$ m.

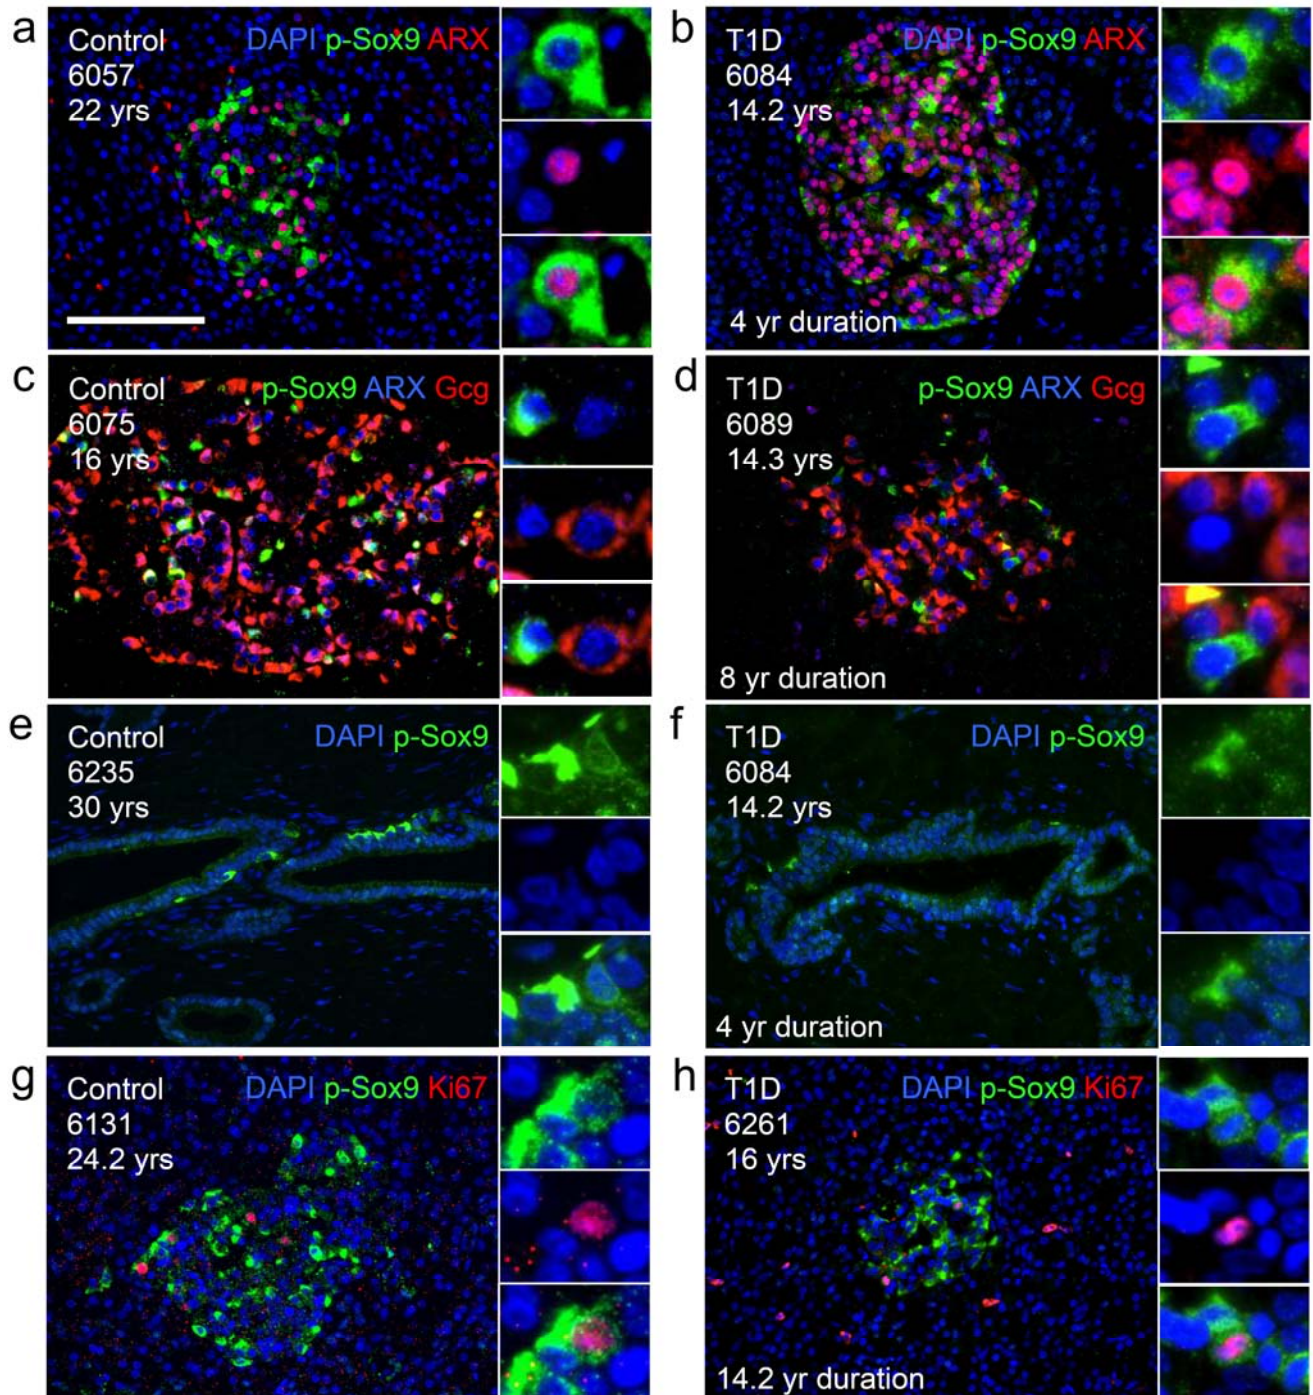

SUPPLEMENTARY DATA

**Supplementary Figure. S7. Sox9<sup>Cyt</sup> cells do not co-express neuronal markers. (a-b)** Control young adult islets stained for DAPI (blue), Sox9 (green), and neuronal marker, **(a)**  $\beta$ 3 tubulin (red) or **(b)** NeuN (red). Scale bar: 100 $\mu$ m.

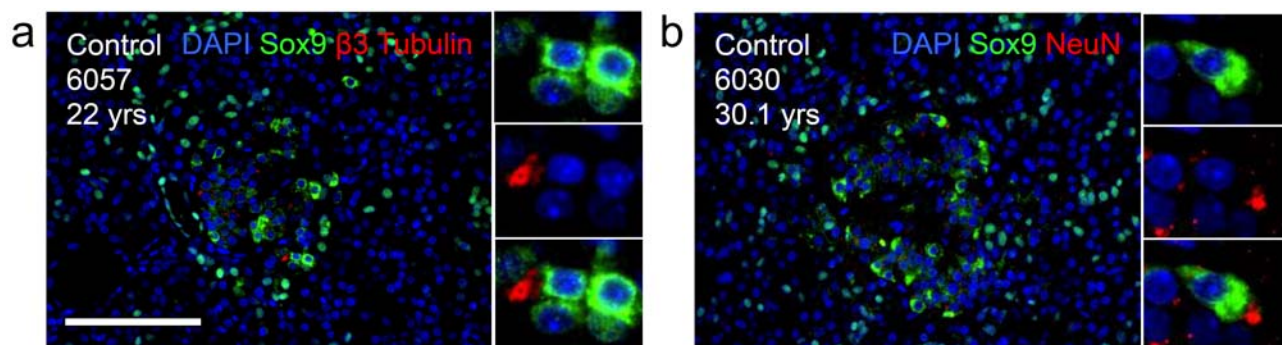



SUPPLEMENTARY DATA

**Supplementary Figure. S8. Highly proliferative cells do not express  $\beta$ -cell specific markers.** Control adolescent and young adult islets stained for Sox9, Ki67, and various  $\beta$ -cell markers. Most Ki67+ cells do not express  $\beta$ -cell markers: **(a)** Pdx1 (green), insulin (blue), Ki67 (red) **(b)** Nkx6.1 (green), insulin (blue), Sox9 (red) **(c)** MafA (green), insulin (blue), Ki67 (red) **(d)** GAD65 (magenta), insulin (white), Ki67 (green) **(e)** PC1/3 (magenta), insulin (white), Ki67 (green). **(f)** GLUT1 (magenta), insulin (white), Ki67 (green). Scale bar: 100 $\mu$ m.

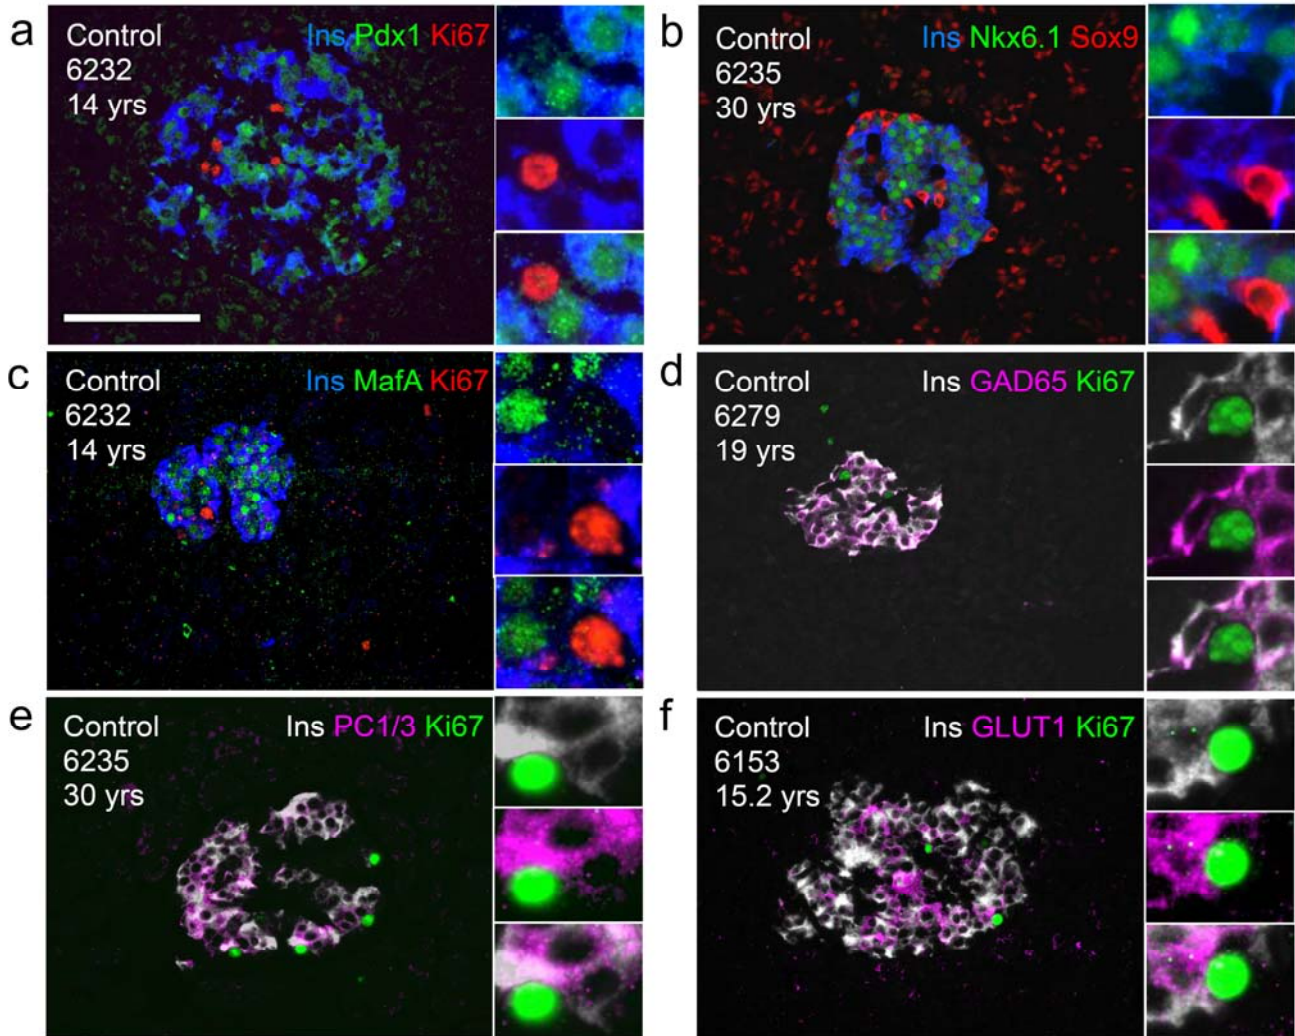

SUPPLEMENTARY DATA

**Supplementary Figure. S9. Sox9<sup>Cyt</sup> cells co-express  $\alpha$ -cell marker, GLP1.** Islet images for (a-b) control and (c) T1D stained for GLP1 and various markers. (a)  $\alpha$ -cells express ARX (blue), glucagon (green), and GLP1 (red). (b-c) Sox9<sup>Cyt</sup> (green) cells express variable GLP1 (red). (c) DAPI (blue), Sox9 (green), and GLP1 (red). Scale bar: 100 $\mu$ m.

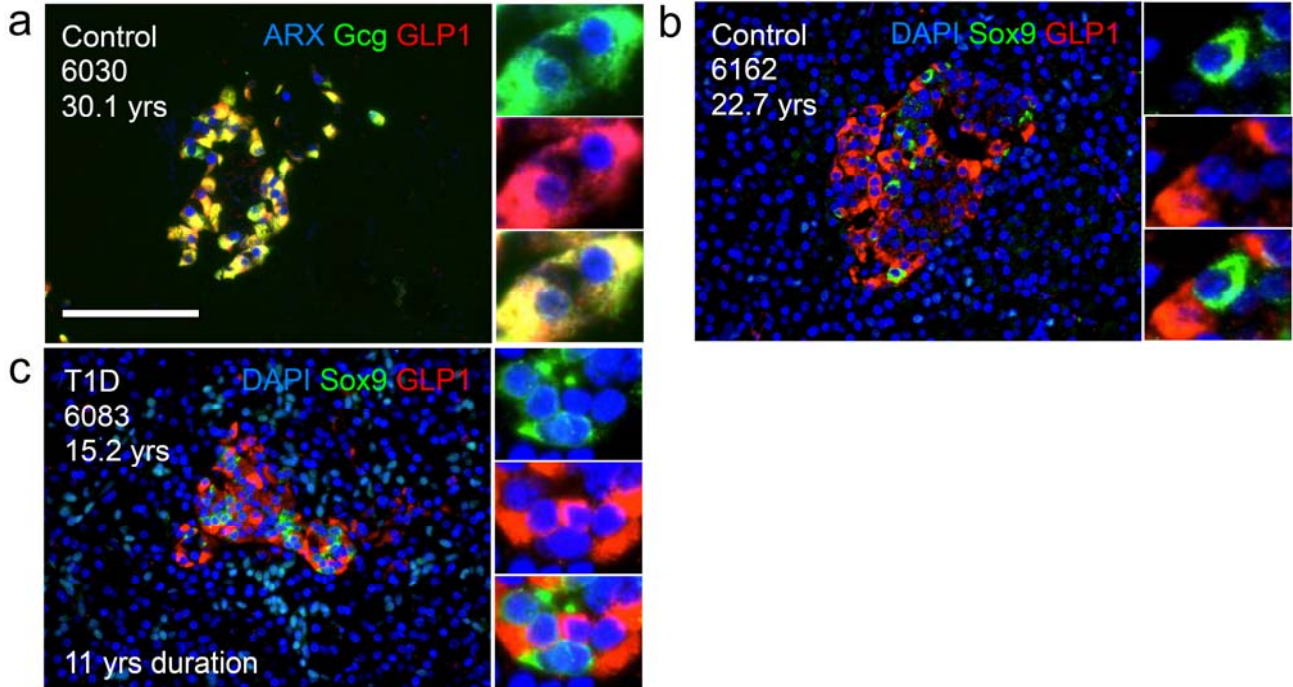

## SUPPLEMENTARY DATA

**Supplementary Figure. S10. Sox9<sup>Cyt</sup> cells co-express INSM1 and Isl1&2, which is common to human  $\alpha$ - and  $\beta$ -cells. (a-b)** Islet images for (a) control and (b) T1D stained for insulin (Ins; green), glucagon (Gcg; white), and INSM1 (red) show INSM1 expression in both human  $\beta$ - and  $\alpha$ -cells. (c) Control and (d) T1D stained for Sox9 (white), ARX (green), and INSM1 (red) reveal Sox9<sup>Cyt</sup> ARX+ cells expressing INSM1. (e) Control islet stained with Sox9 (white), Isl1&2 (red), and ARX (green) reveal that Sox9<sup>Cyt</sup>+ cells within islets contain Isl1&2. (f) Human islets contain Nkx2.2 as shown in control islet stained with insulin (Ins; green), glucagon (Gcg, white) and Nkx2.2 (red). (g) Control islet stained with insulin (Ins; white), Nkx2.2 (red), and Ki67 (green) reveals that Ki67+ insulin negative cells within islets contain Nkx2.2. Scale bar: 100 $\mu$ m.



SUPPLEMENTARY DATA

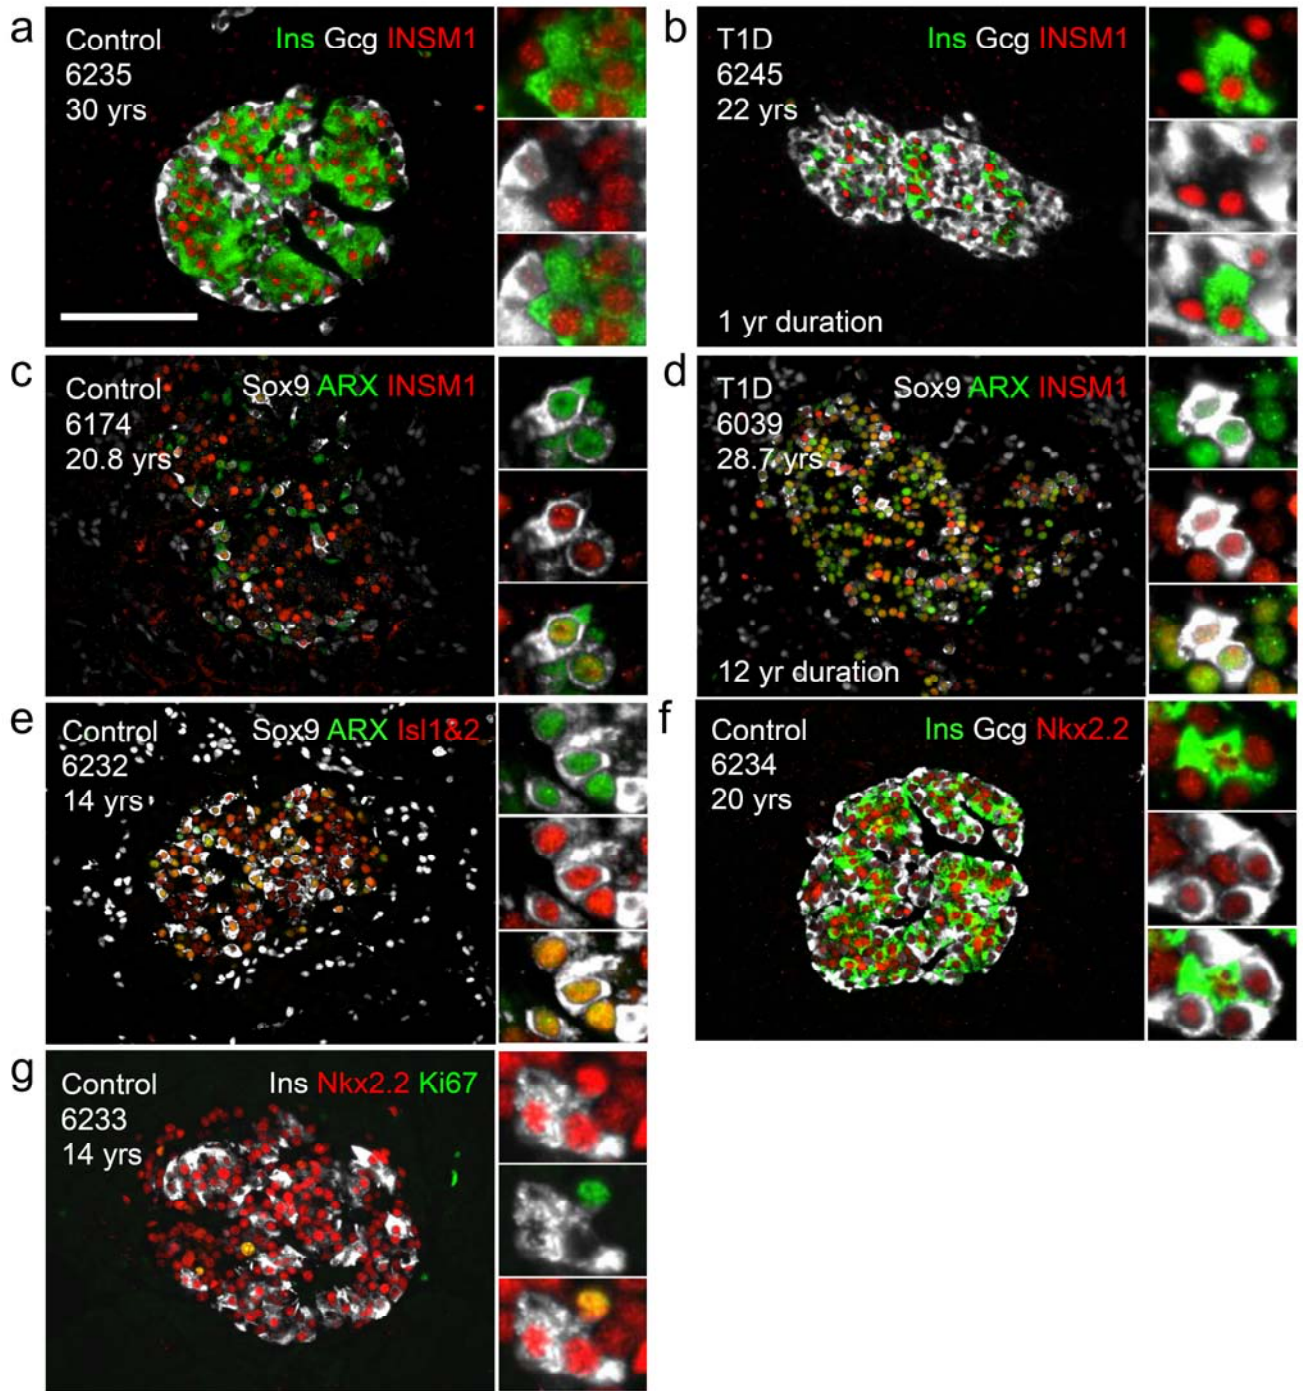

SUPPLEMENTARY DATA

**Supplementary Figure. S11. Highly proliferative cells express markers of secretory vesicles and exocytotic machinery.** (a-c) Control islets stained for chromagranin A (CgA; green/red), insulin (blue), glucagon (green), ARX (blue), and pHH3 reveal that pHH3+ ARX+ intra-islet cells contain CgA which is differentially expressed at higher levels in  $\alpha$ -cells than in  $\beta$ -cells. (c-f) Islet images stained for DAPI (blue), synaptophysin (Syn; green), Sox9<sup>Cyt</sup> (green/red), CgA (red), ARX (white), and related secretory vesicular markers (green). Sox9<sup>Cyt</sup> cells are islet endocrine cells that express (c) Syn, (d) CgA, (e) synaptotagmin 1A (SYT1), and (f) SNAP25. (g-h) SCG3 is absent in (g) some ARX+ cells or in (h) Ki67+ cells. Scale bar: 100 $\mu$ m.

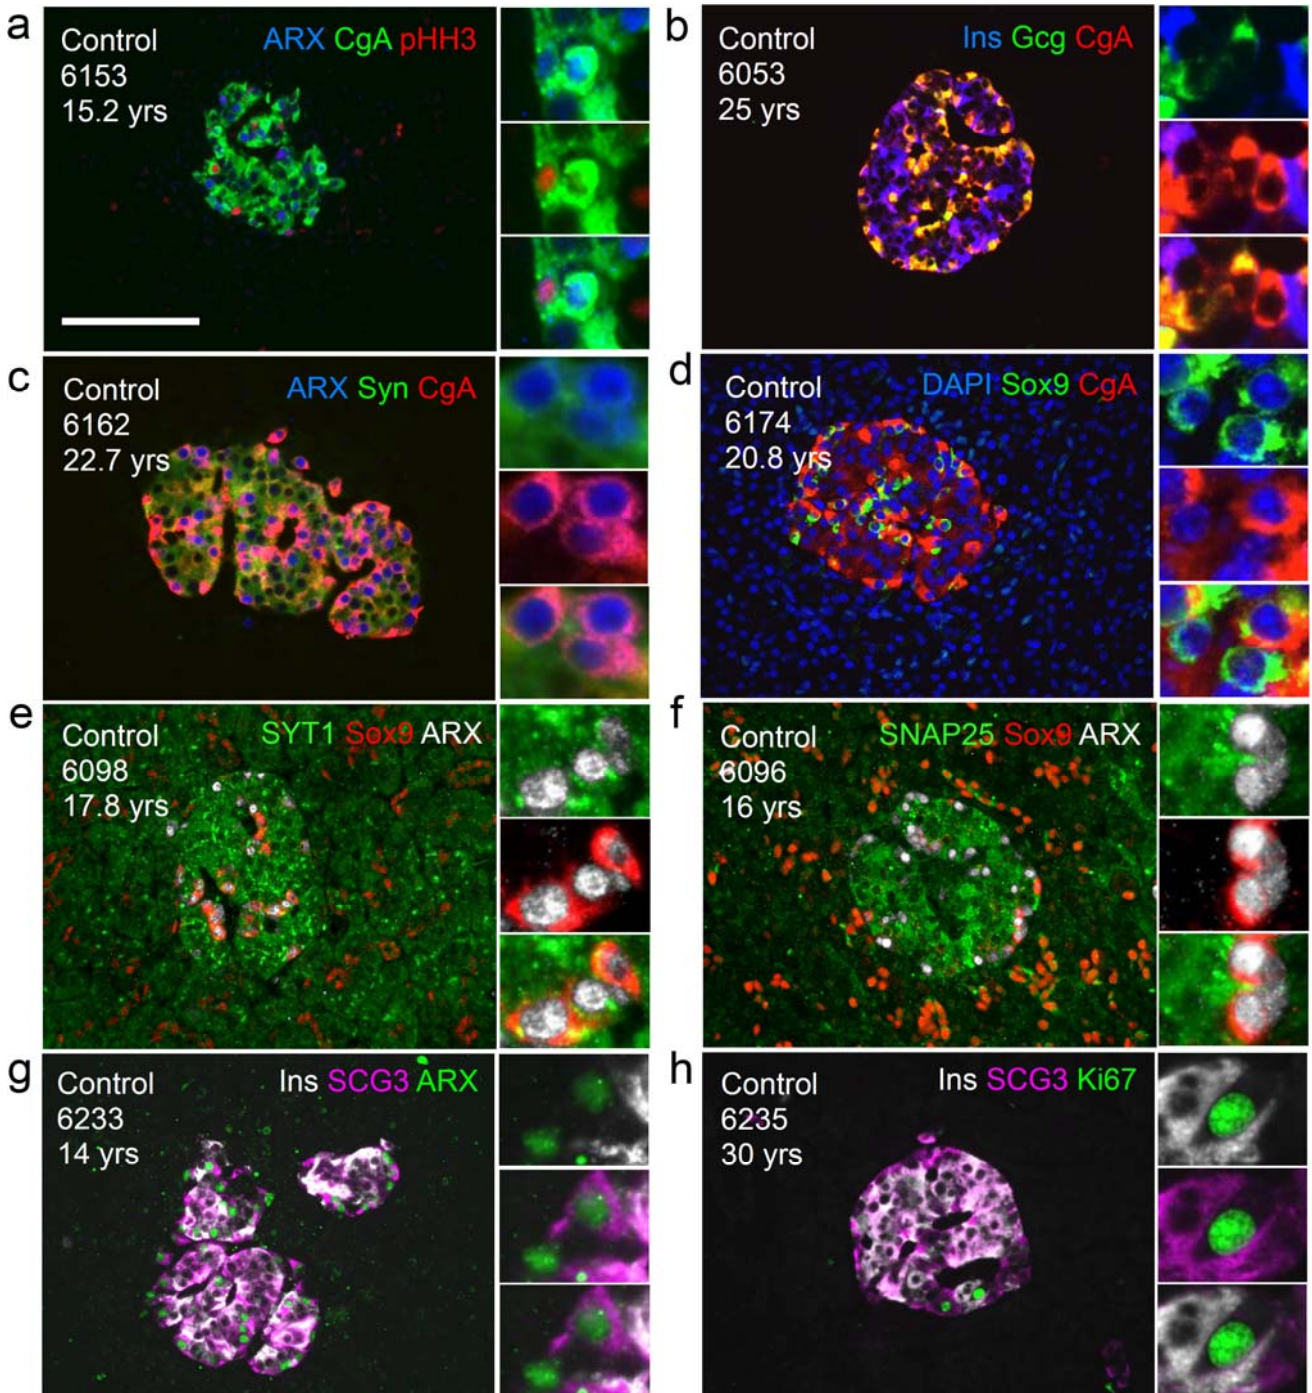



SUPPLEMENTARY DATA

**Supplementary Figure. S12. Adolescent and young adults exhibit increased islet endocrine cell death but no Sox9<sup>Cyt</sup> cell death.** (a-e) Images stained for DAPI (blue), synaptophysin (Syn; green), Sox9<sup>Cyt</sup> (green), and TUNEL (red). (a) Positive control for TUNEL staining within ductal cells. (b-c) Control islets from (b) low and (c) high proliferating individuals reveal very low TUNEL rates in islet endocrine cells, with some TUNEL+ islet endocrine cells increased in highly proliferating adolescent and young adult islets. (d-e) Control islets images from (d) low and (e) high proliferating individuals are representative of no TUNEL+ Sox9<sup>Cyt</sup> cells found in analysis. Scale bar: 100µm. (f-g) TUNEL+ islet endocrine cells (% total) v. age (years) in (f) control and (g) T1D pancreata.

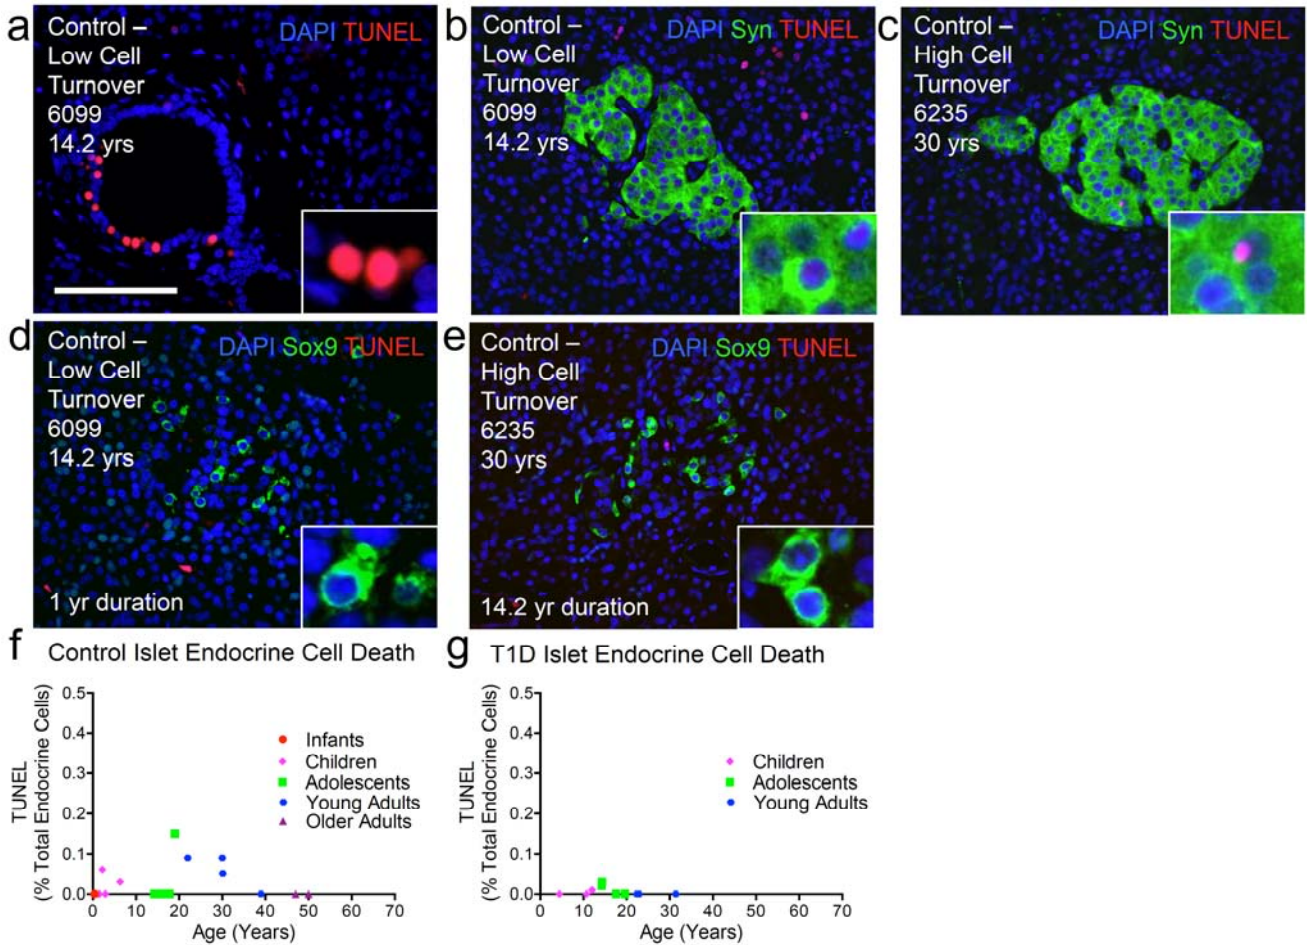



SUPPLEMENTARY DATA

**Supplementary Figure. S13. Islet endocrine area and mass do not accumulate with age after adolescence or with T1D. (a-b)** Islet endocrine cell area and mass are reduced in T1D pancreata. **(a)** Islet endocrine area (% total) is reduced in T1D pancreata. Results expressed as mean  $\pm$  SD for **(a)** controls (n=43) and T1D (n=37). **(b)** Islet endocrine cell mass (g) is reduced in T1D pancreata. Results expressed as mean  $\pm$  SD for controls (n=28) and T1D pancreata (n=33). **(c-d)** Correlation analysis of **(c)** islet endocrine area v. age (years) and **(d)** islet endocrine mass v. age (years). No correlation between age and islet endocrine cell **(c)** area or **(d)** mass for adolescents, young, & older adults.

**a** Islet Endocrine Area – adolescent, young, & older adult

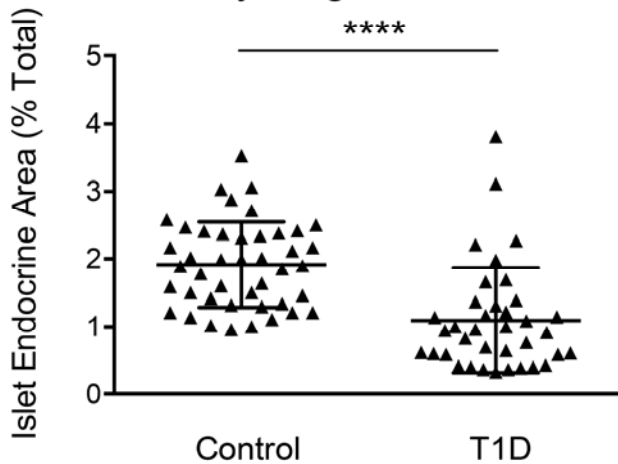

**b** Islet Endocrine Mass – adolescent, young, & older adult

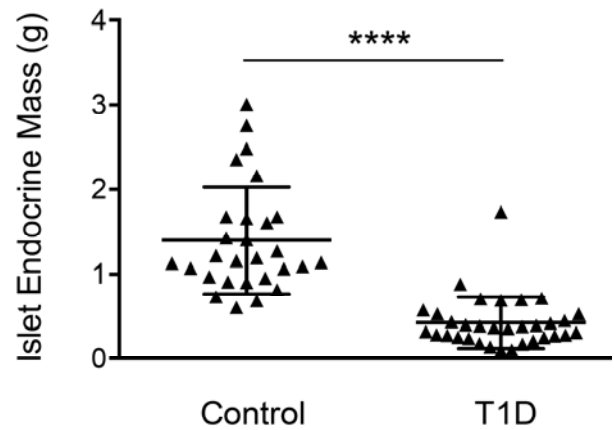

**c** Islet Endocrine Area v. Age – adolescent, young, & older adult

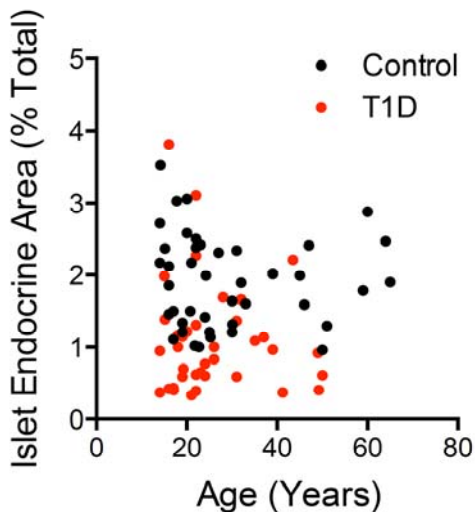

**d** Islet Endocrine Mass v. Age – adolescent, young, & older adult

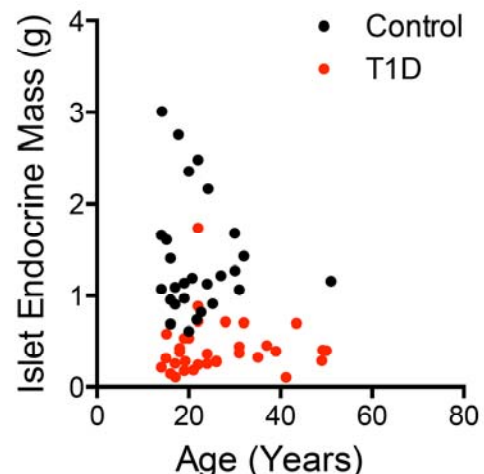

SUPPLEMENTARY DATA

**Supplementary Table 1. Non-Diabetic Sample Population.** nPOD case number, age (years), sex, ethnicity, cause of death, C-peptide (ng/ml), HbA1c (%), BMI, body weight (kg), pancreas sample region, corresponding block number, and method of tissue recovery. "n/a" indicates C-peptide measurements were not measured for that case.

| Control               |             |       |           |                        |                        |           |                  |      |                  |                        |          |                 |             |
|-----------------------|-------------|-------|-----------|------------------------|------------------------|-----------|------------------|------|------------------|------------------------|----------|-----------------|-------------|
| nPOD Case #           | Age (Years) | Sex   | Ethnicity | Cause of Death         | C-peptide (ng/ml)      | HbA1c (%) | HbA1c (mmol/mol) | BMI  | Body Weight (kg) | Pancreas Sample Region | Block #  | Tissue Recovery |             |
| Infants (0-1.4)       | 6200        | 0.005 | F         | Hispanic               | Pulmonary Hypoplasia   | 0.2       | n/a              | n/a  | 14.5             | 2.2                    | PanHead  | 02              | Autopsy     |
|                       | 6214        | 0.014 | M         | Caucasian              | Anoxia                 | 0.2       | n/a              | n/a  | 8                | 2.5                    | PanHead  | 02              | Autopsy     |
|                       | 6164        | 0.030 | M         | Caucasian              | Anoxia                 | n/a       | 5.7              | 39   | 16.5             | 4.7                    | PanOther | 02              | Organ Donor |
|                       | 6218        | 0.080 | F         | African American       | Anoxia                 | 1.5       | n/a              | n/a  | 17.2             | 5.2                    | PanOther | 02              | Organ Donor |
|                       | 6222        | 0.170 | M         | Caucasian              | Anoxia                 | n/a       | n/a              | n/a  | 16.4             | 6.3                    | PanHead  | 02              | Organ Donor |
|                       | 6117        | 0.330 | M         | Caucasian              | Head Trauma            | 3.27      | n/a              | n/a  | 18.4             | 8.5                    | PanTail  | 02              | Organ Donor |
|                       | 6115        | 0.420 | M         | Caucasian              | Anoxia                 | 4.59      | n/a              | n/a  | 17.1             | 7.0                    | PanTail  | 02              | Organ Donor |
|                       | 6092        | 0.500 | F         | African American       | Anoxia                 | 0.35      | n/a              | n/a  | 13.8             | 9.0                    | PanTail  | 02              | Organ Donor |
|                       | 6103        | 1.5   | M         | Caucasian              | Anoxia                 | 0.98      | 6.1              | 43   | 16.8             | 8.0                    | PanTail  | 04              | Organ Donor |
|                       | 6107        | 2.2   | M         | African American       | Anoxia                 | 5.9       | 5.2              | 33   | 15.9             | 15.0                   | PanTail  | 04              | Organ Donor |
| Children (1.5-13.9)   | 6094        | 2.9   | M         | African American       | Anoxia                 | 3.55      | n/a              | n/a  | 15.8             | 14.0                   | PanTail  | 06              | Organ Donor |
|                       | 6106        | 2.9   | M         | Caucasian              | Anoxia                 | 7.36      | n/a              | n/a  | 18.1             | 16.0                   | PanTail  | 04              | Organ Donor |
|                       | 6005        | 5.0   | F         | Caucasian              | Cerebrovascular/Stroke | n/a       | n/a              | n/a  | 15.7             | 16.8                   | PanTail  | 04              | Organ Donor |
|                       | 6112        | 6.3   | F         | Hispanic               | Head Trauma            | 5.11      | 5.6              | 38   | 18.4             | 26.0                   | PanTail  | 04              | Organ Donor |
|                       | 6007        | 9.0   | M         | African American       | Anoxia                 | n/a       | n/a              | n/a  | 20               | 41.0                   | PanTail  | 02              | Organ Donor |
|                       | 6278        | 10.0  | F         | African American       | Anoxia                 | 4.54      | 6.3              | 45   | 21.3             | 52.4                   | PanBody  | 02              | Organ Donor |
|                       | 6232        | 14.0  | F         | Caucasian              | Head Trauma            | 19.5      | n/a              | n/a  | 20.8             | 50.0                   | PanTail  | 04              | Organ Donor |
|                       | 6233        | 14.0  | M         | Caucasian              | Anoxia                 | 7.26      | n/a              | n/a  | 21.9             | 67.0                   | PanTail  | 02              | Organ Donor |
|                       | 6099        | 14.2  | M         | Caucasian              | Head Trauma            | 5.37      | n/a              | n/a  | 30               | 92.0                   | PanTail  | 06              | Organ Donor |
|                       | 6153        | 15.2  | M         | Hispanic               | Head Trauma            | 8.38      | 5.5              | 37   | 20.5             | 58.0                   | PanHead  | 04              | Organ Donor |
| Adolescents (14-20.9) | 6075        | 16.0  | M         | African American       | Anoxia                 | 2.94      | n/a              | b.a  | 14.9             | 30.0                   | PanTail  | 01/02           | Organ Donor |
|                       | 6096        | 16.0  | F         | African American       | Head Trauma            | 2.97      | n/a              | n/a  | 18.8             | 50.0                   | PanTail  | 03              | Organ Donor |
|                       | 6230        | 16.0  | M         | Caucasian              | Head Trauma            | 5.22      | 5.3              | 34   | 18.9             | 56.7                   | PanTail  | 04              | Organ Donor |
|                       | 6227        | 17.0  | F         | Caucasian              | Cerebrovascular/Stroke | 2.75      | n/a              | n/a  | 26.4             | 74.6                   | PanBody  | 04              | Organ Donor |
|                       | 6271        | 17.0  | M         | Caucasian              | Head Trauma            | 11.47     | n/a              | n/a  | 24.4             | 77.1                   | PanBody  | 04              | Organ Donor |
|                       | 6098        | 17.8  | M         | Caucasian              | Head Trauma            | 1.41      | 4.9              | 30   | 22.8             | 74.0                   | PanTail  | 06              | Organ Donor |
|                       | 6253        | 19.0  | F         | African American       | Head Trauma            | 7.22      | n/a              | n/a  | 34.3             | 85.0                   | PanBody  | 02              | Organ Donor |
|                       | 6279        | 19.0  | M         | Caucasian              | Head Trauma            | 8.01      | n/a              | n/a  | 34               | 110.2                  | PanBody  | 02              | Organ Donor |
|                       | 6234        | 20.0  | F         | Caucasian              | Head Trauma            | 6.89      | 5.8              | 40   | 25.6             | 67.6                   | PanTail  | 04              | Organ Donor |
|                       | 6238        | 20.0  | M         | African American       | Head Trauma            | 1.17      | n/a              | n/a  | 21.7             | 74.3                   | PanTail  | 04              | Organ Donor |
| Young Adults (21-39)  | 6174        | 20.8  | M         | Caucasian              | Cerebrovascular/Stroke | 3         | n/a              | n/a  | 19.5             | 75.0                   | PanBody  | 06              | Organ Donor |
|                       | 6024        | 21.0  | M         | Caucasian              | Head Trauma            | 3.52      | n/a              | n/a  | 27.8             | 95.0                   | PanHead  | 10              | Organ Donor |
|                       | 6179        | 21.8  | F         | Caucasian              | Head Trauma            | 2.74      | n/a              | n/a  | 20.7             | 51.0                   | PanBody  | 01A             | Organ Donor |
|                       | 6001        | 22.0  | M         | Caucasian              | Head Trauma            | 1.58      | n/a              | n/a  | 21.9             | 75.0                   | PanTail  | 06              | Organ Donor |
|                       | 6057        | 22.0  | M         | Caucasian              | Head Trauma            | 16.23     | n/a              | n/a  | 26               | 92.0                   | PanTail  | 06              | Organ Donor |
|                       | 6162        | 22.7  | M         | African American       | Head Trauma            | 7.61      | n/a              | n/a  | 28.9             | 102.0                  | PanBody  | 02              | Organ Donor |
|                       | 6003        | 23.0  | F         | Caucasian              | Head Trauma            | n/a       | n/a              | n/a  | 29.3             | 75.0                   | PanTail  | 11              | Organ Donor |
|                       | 6029        | 24.0  | F         | Hispanic               | Cerebrovascular/Stroke | n/a       | n/a              | n/a  | 22.6             | 60.0                   | PanTail  | 02              | Organ Donor |
|                       | 6131        | 24.2  | M         | Caucasian              | Anoxia                 | 1.01      | n/a              | n/a  | 24.8             | 83.0                   | PanHead  | 05              | Organ Donor |
|                       | 6053        | 25.0  | M         | Caucasian              | Head Trauma            | 1.77      | n/a              | n/a  | 21.2             | 59.0                   | PanOther | 01              | Organ Donor |
| Older Adults (≥40)    | 6126        | 25.2  | M         | Caucasian              | Head Trauma            | 0.88      | n/a              | n/a  | 25.1             | 77.0                   | PanBody  | 04              | Organ Donor |
|                       | 6058        | 27.0  | M         | Hispanic               | Head Trauma            | 9.09      | n/a              | n/a  | 19.1             | 52.0                   | PanTail  | 05              | Organ Donor |
|                       | 6048        | 30.0  | M         | Caucasian              | Cerebrovascular/Stroke | 17.91     | n/a              | n/a  | 20.6             | 56.0                   | PanTail  | 04              | Organ Donor |
|                       | 6235        | 30.0  | M         | Caucasian              | Head Trauma            | 8.1       | n/a              | n/a  | 25.4             | 76.0                   | PanTail  | 04              | Organ Donor |
|                       | 6030        | 30.1  | M         | Caucasian              | Head Trauma            | 2.54      | n/a              | n/a  | 27.1             | 86.0                   | PanBody  | 04              | Organ Donor |
|                       | 6229        | 31.0  | F         | Caucasian              | Head Trauma            | 6.23      | 5.5              | 37   | 26.9             | 65.5                   | PanTail  | 02              | Organ Donor |
|                       | 6034        | 32.0  | F         | Caucasian              | Head Trauma            | 3.15      | n/a              | n/a  | 25.2             | 62.0                   | PanBody  | 02              | Organ Donor |
|                       | 6004        | 33.0  | M         | Caucasian              | Head Trauma            | n/a       | n/a              | n/a  | n/a              | n/a                    | PanHead  | 02              | Organ Donor |
|                       | 6002        | 39.0  | M         | Caucasian              | Head Trauma            | n/a       | n/a              | n/a  | 23.7             | 75.0                   | PanHead  | 04              | Organ Donor |
|                       | 6015        | 39.0  | F         | Caucasian              | Anoxia                 | 1.99      | n/a              | n/a  | n/a              | 102.0                  | PanTail  | 09              | Organ Donor |
| Older Adults (≥40)    | 6009        | 45.0  | M         | Caucasian              | Anoxia                 | 11.32     | n/a              | n/a  | 30.6             | 97.0                   | PanHead  | 04              | Organ Donor |
|                       | 6011        | 46.0  | F         | African American       | Cerebrovascular/Stroke | n/a       | n/a              | n/a  | 26.3             | 70.0                   | PanHead  | 02              | Organ Donor |
|                       | 6010        | 47.0  | F         | Caucasian              | Cerebrovascular/Stroke | n/a       | n/a              | n/a  | 19.7             | 56.8                   | PanTail  | 09              | Organ Donor |
|                       | 6008        | 50.0  | F         | Caucasian              | Head Trauma            | n/a       | n/a              | n/a  | 24.2             | 62.0                   | PanHead  | 08              | Organ Donor |
|                       | 6168        | 51.0  | M         | Hispanic               | Cerebrovascular/Stroke | n/a       | 6.2              | 44   | 25.2             | 73.0                   | PanHead  | 02              | Organ Donor |
|                       | 6017        | 59.0  | F         | Caucasian              | Cerebrovascular/Stroke | 9.89      | n/a              | n/a  | 24.8             | 68.0                   | PanHead  | 08              | Organ Donor |
|                       | 6020        | 60.0  | M         | Caucasian              | Cerebrovascular/Stroke | 2.82      | n/a              | n/a  | 29.8             | 102.0                  | PanHead  | 08              | Organ Donor |
|                       | 6016        | 64.0  | F         | Caucasian              | Cerebrovascular/Stroke | n/a       | n/a              | n/a  | 31.2             | 88.0                   | PanHead  | 08              | Organ Donor |
| 6013                  | 65.0        | M     | Caucasian | Cerebrovascular/Stroke | 2.8                    | n/a       | n/a              | 24.2 | 90.0             | PanHead                | 06       | Organ Donor     |             |



SUPPLEMENTARY DATA

**Supplementary Table 2. T1D Sample Population.** nPOD case number, age (years), duration of diabetes (years), sex, ethnicity, cause of death, C-peptide (ng/ml), HbA1c (%), positive autoantibodies and total autoantibody count (out of the 4 autoantibodies tested), BMI, body weight (kg), pancreas sample region, corresponding block number, method of tissue recovery. T1D diagnosis for nPOD cases was based on review of terminal charts, clinical and biochemical testing, and histopathology. Consideration from medical records includes the donor's admission course, age, BMI, body weight, laboratory profiles (chemistry, urinalysis, toxicology), diagnoses, and medications. nPOD expert clinicians and pathologists assessed medical records in conjunction with the results of biochemical tests and histopathological analysis. These include autoantibody and C-peptide testing in addition to high-resolution HLA typing. Tissue sections were screened for histological features such as presence of amyloid, islet hormones, inflammation, and fibrosis. Pancreatic tissue diagnosed (Dx'd) by nPOD for fibrosis and acinar atrophy are marked by "X." "<0.05 ng/ml" C-peptide infers that C-peptide levels were not measured using an ultra-sensitive C-peptide kit; "n/a" indicates C-peptide measurements were not measured for that case. GADA - Glutamic acid decarboxylase autoantibodies; IA 2A - Insulinoma-2-associated autoantibodies; M IAA - insulin autoantibodies; ZnT8A - Zinc transporter 8 autoantibodies.

| T1D                   |             |                     |      |                  |                        |                        |           |                  |      |       |       |       |                                |      |                  |                        |          |                 |                       |                             |   |
|-----------------------|-------------|---------------------|------|------------------|------------------------|------------------------|-----------|------------------|------|-------|-------|-------|--------------------------------|------|------------------|------------------------|----------|-----------------|-----------------------|-----------------------------|---|
| nPOD Case #           | Age (Years) | Years with Diabetes | Sex  | Ethnicity        | Cause of Death         | C-peptide (ng/ml)      | HbA1c (%) | HbA1c (mmol/mol) | GADA | IA 2A | M IAA | ZnT8A | Total Auto Ab Count (out of 4) | BMI  | Body Weight (kg) | Pancreas Sample Region | Block #  | Tissue Recovery | Fibrosis Dx'd by nPOD | Acinar Atrophy Dx'd by nPOD |   |
| Children (1.5-13.9)   | 6063        | 4.4                 | 3.0  | M                | Caucasian              | Anoxia                 | <0.05     | n/a              | n/a  | -     | -     | +     | -                              | 1    | 23.8             | 16.0                   | PanTail  | 02              | Organ Donor           |                             |   |
|                       | 6209        | 5.0                 | 0.3  | F                | Caucasian              | DKA, Cerebral Edema    | 0.1       | n/a              | n/a  | -     | +     | +     | +                              | 3    | 12               | 15.0                   | PanBody  | 04              | Autopsy               |                             |   |
|                       | 6062        | 10.7                | 6.0  | M                | African American       | DKA, Cerebral Edema    | n/a       | 12.4             | 112  | n/a   | n/a   | n/a   | n/a                            | n/a  | 21.9             | 48.0                   | PanTail  | 03              | Organ Donor           |                             |   |
|                       | 6265        | 11.0                | 8.0  | M                | Caucasian              | Cerebrovascular/Stroke | 0.06      | n/a              | n/a  | +     | -     | +     | -                              | 2    | 12.9             | 26.0                   | PanBody  | 02              | Organ Donor           | X                           | X |
|                       | 6052        | 12.0                | 1.0  | M                | African American       | Cerebral Edema         | 0.18      | n/a              | n/a  | -     | +     | +     | -                              | 2    | 20.3             | 56.0                   | PanTail  | 02              | Organ Donor           |                             |   |
|                       | 6268        | 12.0                | 3.0  | F                | Caucasian              | Anoxia                 | 0.05      | 9.8              | 84   | -     | -     | +     | -                              | 1    | 23.5             | 68.0                   | PanTail  | 01              | Organ Donor           |                             | X |
|                       | 6264        | 12.0                | 9.0  | F                | Caucasian              | DKA                    | 0.001     | 8.9              | 74   | -     | -     | -     | -                              | 0    | 22               | 34.0                   | PanBody  | 02              | Organ Donor           | X                           | X |
|                       | 6228        | 13.0                | 0.0  | M                | Caucasian              | Anoxia                 | 0.1       | 13.3             | 122  | +     | +     | -     | +                              | 3    | 17.4             | 45.0                   | PanBody  | 04              | Organ Donor           |                             | X |
|                       | 6243        | 13.0                | 5.0  | M                | Caucasian              | Cerebrovascular/Stroke | 0.42      | 13.1             | 120  | -     | -     | +     | -                              | 1    | 21.3             | 58.1                   | PanHead  | 01              | Organ Donor           |                             |   |
|                       | 6113        | 13.1                | 1.6  | F                | Caucasian              | Head Trauma            | <0.05     | n/a              | n/a  | -     | -     | +     | -                              | 1    | 24.5             | 48.0                   | PanBody  | 04              | Organ Donor           |                             | X |
| Adolescents (14-20.9) | 6084        | 14.2                | 4.0  | M                | Caucasian              | Anoxia                 | <0.05     | n/a              | n/a  | -     | -     | +     | -                              | 1    | 26.3             | 60.0                   | PanBody  | 02              | Organ Donor           |                             |   |
|                       | 6089        | 14.3                | 8.0  | M                | Caucasian              | Anoxia                 | <0.05     | 10.4             | 90   | -     | -     | +     | -                              | 1    | 26               | 69.0                   | PanTail  | 02              | Organ Donor           |                             |   |
|                       | 6049        | 15.0                | 10.0 | F                | African American       | Anoxia                 | <0.05     | n/a              | n/a  | +     | -     | +     | -                              | 2    | 20.8             | 52.0                   | PanTail  | 04              | Organ Donor           |                             |   |
|                       | 6083        | 15.2                | 11.0 | F                | Caucasian              | DKA, Cerebral Edema    | <0.05     | n/a              | n/a  | -     | -     | +     | -                              | 1    | 18.4             | 50.0                   | PanTail  | 04              | Organ Donor           |                             |   |
|                       | 6207        | 16.0                | 10.0 | F                | African American       | Cerebrovascular/Stroke | 0.001     | n/a              | n/a  | -     | +     | +     | +                              | 3    | 24.4             | 66.2                   | PanHead  | 02              | Organ Donor           |                             |   |
|                       | 6261        | 16.0                | 14.2 | M                | Caucasian              | Anoxia                 | 0.001     | 7.2              | 55   | +     | -     | +     | -                              | 2    | 20.7             | 63.5                   | PanOther | 08              | Organ Donor           | X                           | X |
|                       | 6148        | 17.1                | 7.0  | M                | Caucasian              | Anoxia                 | 0.001     | n/a              | n/a  | +     | -     | +     | -                              | 2    | 23.9             | 65.0                   | PanBody  | 02              | Organ Donor           |                             |   |
|                       | 6087        | 17.5                | 4.0  | M                | Caucasian              | Head Trauma            | <0.05     | n/a              | n/a  | -     | -     | +     | +                              | 3    | 21.9             | 71.0                   | PanBody  | 01              | Organ Donor           |                             |   |
|                       | 6145        | 18.0                | 11.0 | M                | Caucasian              | Head Trauma            | 0.06      | n/a              | n/a  | +     | -     | +     | +                              | 2    | 23.1             | 67.0                   | PanBody  | 04              | Organ Donor           |                             |   |
|                       | 6237        | 18.0                | 12.0 | F                | Caucasian              | Head Trauma            | 0.001     | n/a              | n/a  | +     | -     | +     | -                              | 2    | 26               | 75.0                   | PanHead  | 02              | Organ Donor           |                             | X |
| Young Adults (21-39)  | 6195        | 19.2                | 5.0  | M                | Caucasian              | Head Trauma            | <0.05     | n/a              | n/a  | +     | +     | +     | +                              | 4    | 23.7             | 75.0                   | PanBody  | 04              | Organ Donor           |                             | X |
|                       | 6161        | 19.2                | 7.0  | F                | Caucasian              | Cerebrovascular/Stroke | 0.001     | 11.1             | 98   | -     | +     | +     | -                              | 2    | 36.1             | 102.0                  | PanHead  | 02              | Organ Donor           |                             |   |
|                       | 6064        | 19.6                | 9.0  | F                | Caucasian              | Anoxia                 | <0.05     | n/a              | n/a  | +     | +     | +     | -                              | 3    | 22.6             | 59.0                   | PanTail  | 02              | Organ Donor           |                             |   |
|                       | 6212        | 20.0                | 5.0  | M                | Caucasian              | Anoxia                 | 0.001     | 6.4              | 46   | -     | -     | +     | -                              | 1    | 29.1             | 80.2                   | PanTail  | 02              | Organ Donor           |                             |   |
|                       | 6224        | 21.0                | 1.5  | F                | Caucasian              | Anoxia                 | 0.001     | n/a              | n/a  | -     | -     | -     | -                              | 0    | 22.8             | 60.2                   | PanHead  | 04              | Organ Donor           |                             |   |
|                       | 6198        | 22.0                | 3.0  | F                | Hispanic/Latino        | Cerebrovascular/Stroke | 0.001     | n/a              | n/a  | +     | +     | +     | +                              | 4    | 23.1             | 63.0                   | PanTail  | 04              | Organ Donor           |                             | X |
|                       | 6245        | 22.0                | 7.0  | M                | Caucasian              | Head Trauma            | 0.001     | n/a              | n/a  | +     | +     | -     | -                              | 2    | 23.2             | 77.7                   | PanBody  | 02              | Organ Donor           |                             | X |
|                       | 6026        | 22.4                | 14.0 | M                | Caucasian              | Head Trauma            | <0.05     | n/a              | n/a  | -     | -     | +     | -                              | 1    | 24.1             | 68.0                   | PanHead  | 01              | Organ Donor           |                             |   |
|                       | 6070        | 22.6                | 7.0  | F                | Caucasian              | Anoxia                 | <0.05     | n/a              | n/a  | -     | +     | +     | -                              | 2    | 21.6             | 61.0                   | PanBody  | 04              | Organ Donor           |                             |   |
|                       | 6069        | 22.9                | 7.0  | M                | African American       | Head Trauma            | n/a       | n/a              | n/a  | n/a   | n/a   | n/a   | n/a                            | n/a  | 28.8             | 104.0                  | PanTail  | 02              | Organ Donor           | X                           | X |
| Older Adults          | 6025        | 23.8                | 19.0 | M                | Caucasian              | Anoxia                 | <0.05     | n/a              | n/a  | -     | -     | +     | -                              | 1    | 26.6             | 79.0                   | PanOther | 04              | Organ Donor           |                             |   |
|                       | 6247        | 24.0                | 0.6  | M                | Caucasian              | Head Trauma            | 0.47      | n/a              | n/a  | -     | -     | +     | -                              | 1    | 24.3             | 81.2                   | PanTail  | 02              | Organ Donor           |                             | X |
|                       | 6211        | 24.0                | 4.0  | F                | African American       | Anoxia                 | 0.001     | 10.5             | 91   | +     | +     | +     | +                              | 4    | 24.4             | 74.8                   | PanHead  | 02              | Organ Donor           |                             |   |
|                       | 6196        | 28.0                | 15.0 | F                | African American       | Anoxia                 | 0.48      | n/a              | n/a  | +     | -     | +     | -                              | 2    | 28.6             | 65.7                   | PanHead  | 02              | Organ Donor           |                             | X |
|                       | 6041        | 28.3                | 23.0 | M                | Caucasian              | Cerebrovascular/Stroke | <0.05     | n/a              | n/a  | +     | -     | -     | -                              | 0    | 28.4             | 87.0                   | PanHead  | 02              | Organ Donor           |                             |   |
|                       | 6039        | 28.7                | 12.0 | F                | Caucasian              | Head Trauma            | <0.05     | n/a              | n/a  | +     | +     | +     | +                              | 4    | 23.4             | 74.0                   | PanHead  | 01              | Organ Donor           |                             |   |
|                       | 6088        | 31.2                | 5.0  | M                | Caucasian              | Head Trauma            | <0.05     | n/a              | n/a  | +     | +     | +     | +                              | 4    | 27               | 78.0                   | PanTail  | 04              | Organ Donor           | X                           | X |
|                       | 6081        | 31.4                | 15.0 | M                | Hispanic               | Cerebrovascular/Stroke | 0.24      | n/a              | n/a  | -     | -     | -     | -                              | 0    | 28               | 78.0                   | PanHead  | 02              | Organ Donor           |                             |   |
|                       | 6035        | 32.1                | 28.0 | M                | Caucasian              | Cerebrovascular/Stroke | <0.05     | n/a              | n/a  | -     | -     | +     | -                              | 1    | 27.1             | 86.0                   | PanHead  | 05              | Organ Donor           |                             |   |
|                       | 6054        | 35.1                | 30.0 | F                | Caucasian              | Cerebrovascular/Stroke | <0.05     | n/a              | n/a  | -     | -     | +     | -                              | 1    | 30.4             | 75.0                   | PanBody  | 04              | Organ Donor           | X                           | X |
| 6038                  | 37.2        | 20.0                | F    | Caucasian        | Anoxia                 | 0.2                    | n/a       | n/a              | -    | -     | -     | -     | 0                              | 30.9 | 83.9             | PanHead                | 01       | Organ Donor     | X                     | X                           |   |
| 6031                  | 39.0        | 35.0                | M    | Caucasian        | Cerebrovascular/Stroke | <0.05                  | n/a       | n/a              | -    | -     | +     | -     | 1                              | 24.5 | 82.0             | PanOther               | 02       | Organ Donor     | X                     | X                           |   |
| 6150                  | 41.2        | 35.0                | M    | Caucasian        | Anoxia                 | <0.05                  | n/a       | n/a              | -    | -     | +     | -     | 1                              | 25.5 | 72.0             | PanBody                | 04       | Organ Donor     | X                     | X                           |   |
| 6135                  | 43.5        | 21.0                | M    | Caucasian        | Anoxia                 | <0.05                  | n/a       | n/a              | +    | -     | +     | -     | 2                              | 28.7 | 81.0             | PanHead                | 02       | Organ Donor     | X                     | X                           |   |
| 6036                  | 49.2        | 34.0                | F    | African American | Anoxia                 | <0.05                  | n/a       | n/a              | -    | -     | +     | -     | 1                              | 25.5 | 59.0             | PanHead                | 04       | Organ Donor     |                       | X                           |   |
| 6138                  | 49.2        | 41.0                | F    | Caucasian        | Anoxia                 | <0.05                  | n/a       | n/a              | -    | -     | +     | -     | 1                              | 33.7 | 95.0             | PanBody                | 04       | Organ Donor     |                       |                             |   |
| 6040                  | 50.0        | 20.0                | F    | Caucasian        | Cerebrovascular/Stroke | <0.05                  | 7.3       | 56               | -    | -     | +     | -     | 1                              | 31.6 | 85.0             | PanHead                | 04       | Organ Donor     |                       | X                           |   |



SUPPLEMENTARY DATA

**Supplementary Table 3. Immunohistochemistry Antibodies.** Antibody antigen, host, dilution, manufacturer, and catalog number.

SUPPLEMENTARY DATA

| PRIMARY ANTIBODIES     |                     |          |                         |                                                          |
|------------------------|---------------------|----------|-------------------------|----------------------------------------------------------|
| Antigen                | Host                | Dilution | Manufacturer            | Catalog #                                                |
| ARX                    | Sheep               | 1:100    | R&D Systems             | AF7068                                                   |
| β3 Tubulin             | Chicken             | 1:100    | Novus Biologicals       | NB100-1612                                               |
| CD3                    | Rabbit              | 1:100    | Thermo Fisher           | PA1-37282                                                |
| CD31                   | Rabbit              | 1:100    | Abcam                   | ab28364                                                  |
| Chromagranin A         | Mouse               | 1:100    | Abcam                   | ab8204                                                   |
| Ghrelin                | Rabbit              | 1:100    | Phoenix Pharmaceuticals | H-031-77                                                 |
| Glucagon               | Rabbit              | 1:250    | Abcam                   | ab8055                                                   |
| Glucagon               | Mouse               | 1:250    | Abcam                   | ab10988                                                  |
| GLUT1                  | Mouse               | 1:100    | Millipore               | 07-1401                                                  |
| ISL1 & 2               | Mouse               | 1:100    | DSHB                    | 39.4D5                                                   |
| INSM1                  | Mouse               | 1:100    | Santa Cruz              | sc-271408                                                |
| Insulin                | Guinea Pig          | 1:1500   | Dako                    | A0564                                                    |
| Ki67                   | Mouse               | 1:250    | BD Biosciences          | #550609                                                  |
| NeuN                   | Mouse               | 1:100    | Millipore               | MAB377                                                   |
| Nkx2.2                 | Rabbit              | 1:100    | Abcam                   | ab191077                                                 |
| Nkx6.1                 | Mouse               | 1:100    | DSHB                    | F55A12                                                   |
| Pancreatic Polypeptide | Rabbit              | 1:100    | Invitrogen              | 18-0043                                                  |
| PCNA                   | Mouse               | 1:100    | Cell Signaling          | 2586S                                                    |
| PC1/3                  | Rabbit              | 1:100    | Millipore               | AB10553                                                  |
| Pdx1                   | Rabbit              | 1:100    | Novus Biologicals       | NBP2-38865                                               |
| Phospho-Histone H3     | Rabbit              | 1:100    | Cell Signaling          | 9701S                                                    |
| Proinsulin             | Rat                 | 1:100    | DSHB                    | GN-ID4                                                   |
| SNAP25                 | Mouse               | 1:100    | Millipore               | MAB331                                                   |
| Somatostatin           | Rabbit              | 1:100    | Invitrogen              | 18-0078                                                  |
| Synaptotagmin 1A       | Chicken             | 1:100    | Abcam                   | ab133856                                                 |
| Sox9                   | Rabbit              | 1:100    | Millipore               | AB5535                                                   |
| Sox9 (pS181)           | Rabbit              | 1:100    | Abcam                   | ab59252                                                  |
| Synaptophysin          | Rabbit              | 1:100    | Thermo Fisher           | 18-0130                                                  |
| Synaptophysin          | Mouse               | 1:100    | Abcam                   | AB6245                                                   |
| SECONDARY ANTIBODIES   |                     |          |                         |                                                          |
| Secondary Antibody     |                     | Dilution | Manufacturer            | Catalog Number                                           |
| Alexa Fluor            | Donkey α-Guinea Pig | 1:3000   | Jackson ImmunoResearch  | 706-155-148<br>706-545-148<br>706-165-148<br>706-605-148 |
| Alexa Fluor            | Donkey α-Chicken    | 1:250    | Jackson ImmunoResearch  | 703-155-155<br>703-545-155<br>703-165-155<br>703-605-155 |
| Alexa Fluor            | Donkey α-Mouse      | 1:250    | Jackson ImmunoResearch  | 715-155-150<br>715-545-150<br>715-165-150<br>715-605-150 |
| Alexa Fluor            | Donkey α-Rabbit     | 1:250    | Jackson ImmunoResearch  | 711-155-152<br>711-545-152<br>711-165-152<br>711-605-152 |
| Alexa Fluor            | Donkey α-Rat        | 1:250    | Jackson ImmunoResearch  | 712-155-153<br>712-545-153<br>712-165-153<br>712-605-153 |
| Alexa Fluor            | Donkey α-Sheep      | 1:250    | Jackson ImmunoResearch  | 713-155-147<br>713-545-147<br>713-165-147<br>713-605-147 |

SUPPLEMENTARY DATA

**Supplementary Table 4. Summary of experimental details.** The number of pancreas donors, pancreas sections, and cells counted for each analysis performed. "n/a" indicates that data analysis is not available or not performed for the indicated cohort.

|         | Islet Endocrine Cell Proliferation | α-cell Proliferation | β-cell/Islet cross section | PP Proliferation | SS Proliferation | Ghrelin Proliferation | Sox9 Proliferation | Islet Endocrine Proliferation (% Intraislet Ki67) | α-cell Proliferation (% Intraislet Ki67) | β-cell Proliferation (% Intraislet Ki67) | PP Proliferation (% Intraislet Ki67) | SS Proliferation (% Intraislet Ki67) | Ghrelin Proliferation (% Intraislet Ki67) | Sox9 <sup>hi</sup> Proliferation (% Intraislet Ki67) | Sox9 <sup>int</sup> Ductal Proliferation (% Intraislet Ki67) | Syn+ Sox9 <sup>hi</sup> Proliferation (% Sox9 <sup>hi</sup> ) | Sox9 <sup>hi</sup> ARX+ Proliferation (% Intraislet Ki67) | Ki67+ ARX+ Dcp Proliferation (% Intraislet Ki67) | Islet Endocrine Cell TUNEL | Sox9 TUNEL |           |
|---------|------------------------------------|----------------------|----------------------------|------------------|------------------|-----------------------|--------------------|---------------------------------------------------|------------------------------------------|------------------------------------------|--------------------------------------|--------------------------------------|-------------------------------------------|------------------------------------------------------|--------------------------------------------------------------|---------------------------------------------------------------|-----------------------------------------------------------|--------------------------------------------------|----------------------------|------------|-----------|
| Control | Pancreas Donors                    | 59                   | 59                         | 59               | 5                | 6                     | 5                  | 6                                                 | 12                                       | 12                                       | 12                                   | 3                                    | 3                                         | 3                                                    | 6                                                            | 6                                                             | 3                                                         | 3                                                | 3                          | 18         | 6         |
|         | Pancreas Sections                  | 59                   | 59                         | 59               | 5                | 6                     | 5                  | 6                                                 | 12                                       | 12                                       | 12                                   | 3                                    | 3                                         | 3                                                    | 6                                                            | 6                                                             | 3                                                         | 3                                                | 3                          | 18         | 6         |
|         | Cells                              | 624233               | 184431                     | 184431           | 2321             | 8968                  | 872                | 5820                                              | 133060                                   | 36825                                    | 85055                                | 1375                                 | 6533                                      | 604                                                  | 5820                                                         | 6258                                                          | 21545                                                     | 12889                                            | 5364                       | 154874     | 893 cells |
| T1D     | Pancreas Donors                    | 48                   | 48                         | 48               | 9                | 9                     | 9                  | 6                                                 | 6                                        | 6                                        | 8                                    | 7                                    | 9                                         | 6                                                    | 6                                                            | 3                                                             | 3                                                         | 3                                                | 12                         | n/a        |           |
|         | Pancreas Sections                  | 48                   | 48                         | 48               | 9                | 9                     | 9                  | 6                                                 | 6                                        | 6                                        | 8                                    | 7                                    | 9                                         | 6                                                    | 6                                                            | 3                                                             | 3                                                         | 3                                                | 12                         | n/a        |           |
|         | Cells                              | 458626               | 259175                     | 259175           | 1088             | 8941                  | 795                | 3230                                              | 70297                                    | 46403                                    | 6089                                 | 690                                  | 4008                                      | 261                                                  | 3230                                                         | 1478                                                          | 18077                                                     | 10156                                            | 1167                       | 85768      | n/a       |



SUPPLEMENTARY DATA

**Supplementary Table 5. Individual intraislet proliferation from non-diabetic and T1D pancreata.**  
 Intraislet Ki67+ cells (number and % total), total intraislet cells (number).

| nPOD Case #    | Age (Years) | Control                |                        |                            |
|----------------|-------------|------------------------|------------------------|----------------------------|
|                |             | Intraislet Ki67+ cells | Total Intraislet cells | Ki67+ Intraislet (% Total) |
| 6200           | 0.005       | 403                    | 12073                  | 3.34                       |
| 6214           | 0.014       | 169                    | 6268                   | 2.70                       |
| 6164           | 0.030       | 659                    | 8073                   | 8.16                       |
| 6218           | 0.080       | 115                    | 8764                   | 1.31                       |
| 6222           | 0.170       | 49                     | 5815                   | 0.84                       |
| <b>Average</b> | 0.1         | 279                    | 8199                   | 3.27                       |
| <b>SD</b>      | 0.1         | 251                    | 2488                   | 2.92                       |
| <b>SEM</b>     | 0.0         | 112                    | 1113                   | 1.30                       |
| 6278           | 10.0        | 77                     | 17078                  | 0.45                       |
| 6232           | 14.0        | 80                     | 8218                   | 0.97                       |
| 6233           | 14.0        | 183                    | 23368                  | 0.78                       |
| 6230           | 16.0        | 182                    | 17406                  | 1.05                       |
| 6227           | 17.0        | 11                     | 9061                   | 0.12                       |
| 6271           | 17.0        | 5                      | 14686                  | 0.03                       |
| 6253           | 19.0        | 63                     | 14768                  | 0.43                       |
| 6279           | 19.0        | 289                    | 12798                  | 2.26                       |
| 6234           | 20.0        | 110                    | 16636                  | 0.66                       |
| 6238           | 20.0        | 7                      | 9126                   | 0.08                       |
| 6174           | 20.8        | 9                      | 14792                  | 0.06                       |
| <b>Average</b> | 17.0        | 92                     | 14358                  | 0.63                       |
| <b>SD</b>      | 3.3         | 92                     | 4462                   | 0.65                       |
| <b>SEM</b>     | 1.0         | 28                     | 1345                   | 0.20                       |
| 6024           | 21.0        | 6                      | 14876                  | 0.04                       |
| 6179           | 21.8        | 72                     | 13048                  | 0.55                       |
| 6162           | 22.7        | 2                      | 7025                   | 0.03                       |
| 6003           | 23.0        | 20                     | 13054                  | 0.15                       |
| 6029           | 24.0        | 6                      | 15409                  | 0.04                       |
| 6131           | 24.2        | 412                    | 17817                  | 2.31                       |
| 6048           | 30.0        | 8                      | 10365                  | 0.08                       |
| 6235           | 30.0        | 197                    | 12293                  | 1.60                       |
| 6030           | 30.1        | 60                     | 8558                   | 0.70                       |
| 6229           | 31.0        | 20                     | 29318                  | 0.07                       |
| 6011           | 46.0        | 5                      | 3366                   | 0.15                       |
| 6008           | 50.0        | 11                     | 5868                   | 0.19                       |
| 6168           | 51.0        | 38                     | 11142                  | 0.34                       |
| 6017           | 59.0        | 1                      | 11146                  | 0.01                       |
| 6020           | 60.0        | 17                     | 9995                   | 0.17                       |
| 6016           | 64.0        | 0                      | 3577                   | 0.00                       |
| 6013           | 65.0        | 0                      | 9939                   | 0.00                       |
| <b>Average</b> | 38.4        | 51                     | 11576                  | 0.38                       |
| <b>SD</b>      | 16.5        | 105                    | 6047                   | 0.64                       |
| <b>SEM</b>     | 4.0         | 25                     | 1467                   | 0.15                       |

| nPOD Case #                 | Age (Years) | Years with Diabetes | T1D                    |                        |                            |
|-----------------------------|-------------|---------------------|------------------------|------------------------|----------------------------|
|                             |             |                     | Intraislet Ki67+ cells | Total Intraislet cells | Ki67+ Intraislet (% Total) |
| 6209                        | 5.0         | 0.3                 | 49                     | 17078                  | 0.29                       |
| 6265                        | 11.0        | 8.0                 | 7                      | 1834                   | 0.38                       |
| 6268                        | 12.0        | 3.0                 | 89                     | 12584                  | 0.71                       |
| 6264                        | 12.0        | 9.0                 | 44                     | 14595                  | 0.30                       |
| 6228                        | 13.0        | 0.0                 | 266                    | 19965                  | 1.33                       |
| 6243                        | 13.0        | 5.0                 | 13                     | 4364                   | 0.30                       |
| 6243                        | 13.0        | 5.0                 | 13                     | 4364                   | 0.30                       |
| 6207                        | 16.0        | 10.0                | 28                     | 10811                  | 0.26                       |
| 6261                        | 16.0        | 14.2                | 1104                   | 18482                  | 5.97                       |
| 6148                        | 17.1        | 7.0                 | 6                      | 7928                   | 0.08                       |
| 6237                        | 18.0        | 12.0                | 83                     | 45235                  | 0.18                       |
| 6161                        | 19.2        | 7.0                 | 21                     | 10334                  | 0.20                       |
| 6212                        | 20.0        | 5.0                 | 75                     | 33015                  | 0.23                       |
| <b>Average</b>              | 14.3        | 6.6                 | 138                    | 15430                  | 0.81                       |
| <b>SD</b>                   | 4.0         | 4.2                 | 298                    | 12153                  | 1.58                       |
| <b>SEM</b>                  | 1.1         | 1.2                 | 83                     | 3371                   | 0.44                       |
| <b>p-value (v. control)</b> | 0.1         | ///                 | 1                      | 1                      | 0.72                       |
| 6224                        | 21.0        | 1.5                 | 41                     | 18468                  | 0.22                       |
| 6198                        | 22.0        | 3.0                 | 12                     | 6939                   | 0.17                       |
| 6245                        | 22.0        | 7.0                 | 64                     | 36377                  | 0.18                       |
| 6247                        | 24.0        | 0.6                 | 12                     | 14780                  | 0.08                       |
| 6211                        | 24.0        | 4.0                 | 61                     | 17658                  | 0.35                       |
| 6196                        | 26.0        | 15.0                | 142                    | 33498                  | 0.42                       |
| <b>Average</b>              | 23.2        | 5.2                 | 55                     | 21287                  | 0.24                       |
| <b>SD</b>                   | 1.83        | 5.3                 | 48                     | 11368                  | 0.13                       |
| <b>SEM</b>                  | 0.75        | 2.2                 | 20                     | 4641                   | 0.05                       |
| <b>p-value (v. control)</b> | 0.04        | ///                 | 1                      | 0                      | 0.60                       |

SUPPLEMENTARY DATA

**Supplementary Table 6. Individual  $\beta$ -cell proliferation expressed as % of inтраislet Ki67+ cells in non-diabetic and T1D pancreata.** Ki67+  $\beta$ -cell (number; % total inтраislet Ki67+ cells), total inтраislet Ki67+ cells (number) from highly proliferative samples.

| Control        |             |                      |                              |                                |
|----------------|-------------|----------------------|------------------------------|--------------------------------|
| nPOD Case #    | Age (Years) | Ki67+ $\beta$ -cells | Total Inтраislet Ki67+ cells | Ki67+ $\beta$ -cells (% Total) |
| 6232           | 14.0        | 11                   | 69                           | 15.94                          |
| 6233           | 14.0        | 16                   | 168                          | 9.52                           |
| 6153           | 15.2        | 5                    | 32                           | 15.63                          |
| 6075           | 16.0        | 6                    | 104                          | 5.77                           |
| 6230           | 16.0        | 29                   | 172                          | 16.86                          |
| 6279           | 19.0        | 18                   | 270                          | 6.67                           |
| 6179           | 21.8        | 3                    | 59                           | 5.08                           |
| 6057           | 22.0        | 9                    | 22                           | 40.91                          |
| 6131           | 24.2        | 5                    | 377                          | 1.33                           |
| 6235           | 30.0        | 8                    | 169                          | 4.73                           |
| 6030           | 30.1        | 0                    | 49                           | 0.00                           |
| 6004           | 33.0        | 0                    | 51                           | 0.00                           |
| <b>Average</b> | 21.3        | 9                    | 129                          | 10.20                          |
| <b>SD</b>      | 6.8         | 8                    | 108                          | 11.38                          |
| <b>SEM</b>     | 2.0         | 2                    | 31                           | 3.29                           |

| T1D                         |             |                     |                      |                              |                                |
|-----------------------------|-------------|---------------------|----------------------|------------------------------|--------------------------------|
| nPOD Case #                 | Age (Years) | Years with Diabetes | Ki67+ $\beta$ -cells | Total Inтраislet Ki67+ cells | Ki67+ $\beta$ -cells (% Total) |
| 6052                        | 12.0        | 1.0                 | 10                   | 849                          | 1.18                           |
| 6268                        | 12.0        | 3.0                 | 0                    | 89                           | 0.00                           |
| 6228                        | 13.0        | 0.0                 | 10                   | 375                          | 2.67                           |
| 6113                        | 13.1        | 1.6                 | 1                    | 72                           | 1.39                           |
| 6084                        | 14.2        | 4.0                 | 5                    | 317                          | 1.58                           |
| 6261                        | 16.0        | 14.2                | 0                    | 1516                         | 0.00                           |
| <b>Average</b>              | 13.4        | 4.0                 | 4                    | 536                          | 1.14                           |
| <b>SD</b>                   | 1.52        | 5.2                 | 5                    | 556                          | 1.02                           |
| <b>SEM</b>                  | 0.62        | 2.1                 | 2                    | 227                          | 0.42                           |
| <b>p-value (v. control)</b> | 0.01        |                     | 0.21                 | 0.02                         | 0.07                           |

SUPPLEMENTARY DATA

**Supplementary Table 7. Individual islet endocrine and  $\alpha$ -cell proliferation from non-diabetic pancreata.** Total synaptophysin+ (Syn) islet endocrine cells (number), Ki67+ Syn+ cells (number and % total),  $\alpha$ -cells (number), Ki67+  $\alpha$ -cells (number and % Total).



SUPPLEMENTARY DATA

|                       |                | Control               |                  |                            |         |               |                         |      |
|-----------------------|----------------|-----------------------|------------------|----------------------------|---------|---------------|-------------------------|------|
|                       |                | Islet Endocrine Cells |                  |                            | α-cells |               |                         |      |
| nPOD Case #           | Age (Years)    | Syn+ cells            | Ki67+ Syn+ cells | Ki67+ Syn+ cells (% Total) | α-cells | Ki67+ α-cells | Ki67+ α-cells (% Total) |      |
| Infants (0-1.4)       | 6200           | 0.005                 | 11573            | 328                        | 2.83    | 809           | 5                       | 0.62 |
|                       | 6214           | 0.014                 | 5630             | 119                        | 2.11    | 908           | 74                      | 8.15 |
|                       | 6164           | 0.030                 | 7535             | 654                        | 8.68    | 1157          | 57                      | 4.93 |
|                       | 6218           | 0.080                 | 8010             | 109                        | 1.36    | 1561          | 40                      | 2.56 |
|                       | 6222           | 0.170                 | 5511             | 48                         | 0.87    | 1469          | 26                      | 1.77 |
|                       | 6117           | 0.330                 | 8651             | 17                         | 0.20    | 3074          | 20                      | 0.65 |
|                       | 6115           | 0.420                 | 7130             | 19                         | 0.27    | 1934          | 3                       | 0.16 |
|                       | 6092           | 0.500                 | 3333             | 128                        | 3.84    | 1198          | 107                     | 8.93 |
|                       | <b>Average</b> | 0.2                   | 7172             | 178                        | 2.52    | 1514          | 42                      | 3.47 |
|                       | <b>SD</b>      | 0.2                   | 2457             | 216                        | 2.79    | 728           | 36                      | 3.48 |
| <b>SEM</b>            | 0.1            | 869                   | 77               | 0.99                       | 257     | 13            | 1.23                    |      |
| Children (1.5-13.9)   | 6103           | 1.5                   | 5839             | 75                         | 1.28    | 2133          | 44                      | 2.06 |
|                       | 6107           | 2.2                   | 14578            | 718                        | 4.93    | 3239          | 218                     | 6.73 |
|                       | 6094           | 2.9                   | 4450             | 3                          | 0.07    | 2217          | 3                       | 0.14 |
|                       | 6106           | 2.9                   | 10907            | 11                         | 0.10    | 8106          | 19                      | 0.23 |
|                       | 6005           | 5.0                   | 19916            | 18                         | 0.09    | 992           | 0                       | 0.00 |
|                       | 6112           | 6.3                   | 12523            | 40                         | 0.32    | 3722          | 39                      | 1.05 |
|                       | 6007           | 9.0                   | 26002            | 95                         | 0.37    | 2971          | 76                      | 2.56 |
|                       | 6278           | 10.0                  | 16328            | 65                         | 0.40    | 3325          | 33                      | 0.99 |
|                       | <b>Average</b> | 5.0                   | 13818            | 128                        | 0.94    | 3338          | 54                      | 1.72 |
|                       | <b>SD</b>      | 3.2                   | 7112             | 241                        | 1.66    | 2112          | 71                      | 2.22 |
| <b>SEM</b>            | 1.1            | 2515                  | 85               | 0.59                       | 747     | 25            | 0.79                    |      |
| Adolescents (14-20.9) | 6232           | 14.0                  | 8636             | 69                         | 0.80    | 2882          | 42                      | 1.46 |
|                       | 6233           | 14.0                  | 22593            | 163                        | 0.72    | 1908          | 21                      | 1.10 |
|                       | 6099           | 14.2                  | 11656            | 7                          | 0.06    | 4595          | 2                       | 0.04 |
|                       | 6153           | 15.2                  | 3512             | 32                         | 0.91    | 1511          | 36                      | 2.38 |
|                       | 6075           | 16.0                  | 9300             | 104                        | 1.12    | 3740          | 67                      | 1.79 |
|                       | 6096           | 16.0                  | 7112             | 11                         | 0.15    | 2176          | 3                       | 0.14 |
|                       | 6230           | 16.0                  | 16285            | 172                        | 1.06    | 2002          | 68                      | 3.40 |
|                       | 6227           | 17.0                  | 8787             | 8                          | 0.09    | 824           | 1                       | 0.12 |
|                       | 6271           | 17.0                  | 14945            | 2                          | 0.01    | 2185          | 1                       | 0.05 |
|                       | 6098           | 17.8                  | 6360             | 3                          | 0.05    | 4366          | 1                       | 0.02 |
|                       | 6253           | 19.0                  | 15244            | 43                         | 0.28    | 1691          | 5                       | 0.30 |
|                       | 6279           | 19.0                  | 12342            | 270                        | 2.19    | 1067          | 22                      | 2.06 |
|                       | 6234           | 20.0                  | 13626            | 13                         | 0.10    | 4135          | 39                      | 0.94 |
|                       | 6238           | 20.0                  | 9368             | 1                          | 0.01    | 4261          | 2                       | 0.05 |
|                       | 6174           | 20.8                  | 14425            | 1                          | 0.01    | 1918          | 2                       | 0.10 |
|                       | <b>Average</b> | 17.1                  | 11613            | 60                         | 0.50    | 2617          | 21                      | 0.93 |
| <b>SD</b>             | 2.3            | 4780                  | 82               | 0.62                       | 1275    | 24            | 1.07                    |      |
| <b>SEM</b>            | 0.59           | 1234                  | 21               | 0.16                       | 329     | 6             | 0.28                    |      |
| Young Adults (21-39)  | 6024           | 21.0                  | 14111            | 3                          | 0.02    | 585           | 0                       | 0.00 |
|                       | 6179           | 21.8                  | 12370            | 59                         | 0.48    | 2848          | 15                      | 0.53 |
|                       | 6001           | 22.0                  | 4824             | 0                          | 0.00    | 11414         | 8                       | 0.07 |
|                       | 6057           | 22.0                  | 4492             | 22                         | 0.49    | 2236          | 4                       | 0.18 |
|                       | 6162           | 22.7                  | 6507             | 1                          | 0.02    | 1637          | 7                       | 0.43 |
|                       | 6003           | 23.0                  | 13816            | 13                         | 0.09    | 5126          | 9                       | 0.18 |
|                       | 6029           | 24.0                  | 15098            | 2                          | 0.01    | 5352          | 1                       | 0.02 |
|                       | 6131           | 24.2                  | 17130            | 377                        | 2.20    | 2334          | 79                      | 3.38 |
|                       | 6053           | 25.0                  | 12280            | 8                          | 0.07    | 3509          | 13                      | 0.37 |
|                       | 6126           | 25.2                  | 5688             | 7                          | 0.12    | 1014          | 9                       | 0.89 |
|                       | 6058           | 27.0                  | 4070             | 3                          | 0.07    | 2240          | 1                       | 0.04 |
|                       | 6048           | 30.0                  | 10157            | 2                          | 0.02    | 3213          | 0                       | 0.00 |
|                       | 6235           | 30.0                  | 12107            | 169                        | 1.40    | 10694         | 115                     | 1.08 |
|                       | 6030           | 30.1                  | 8254             | 49                         | 0.59    | 2088          | 29                      | 1.39 |
|                       | 6229           | 31.0                  | 28550            | 10                         | 0.04    | 14655         | 9                       | 0.06 |
|                       | 6035           | 32.0                  | 7350             | 1                          | 0.01    | 2594          | 0                       | 0.00 |
|                       | 6004           | 33.0                  | 6039             | 51                         | 0.84    | 3515          | 69                      | 1.96 |
|                       | 6002           | 39.0                  | 14758            | 17                         | 0.12    | 4967          | 4                       | 0.08 |
| 6015                  | 39.0           | 8380                  | 2                | 0.02                       | 5127    | 0             | 0.00                    |      |
| <b>Average</b>        | 27.5           | 10841                 | 42               | 0.35                       | 4481    | 20            | 0.56                    |      |
| <b>SD</b>             | 5.6            | 5908                  | 90               | 0.58                       | 3782    | 32            | 0.88                    |      |
| <b>SEM</b>            | 1.3            | 1355                  | 21               | 0.13                       | 868     | 7             | 0.20                    |      |
| Older Adults (≥40)    | 6009           | 45.0                  | 7745             | 44                         | 0.57    | 2134          | 9                       | 0.42 |
|                       | 6011           | 46.0                  | 4025             | 1                          | 0.02    | 4831          | 1                       | 0.02 |
|                       | 6010           | 47.0                  | 5744             | 0                          | 0.00    | 2223          | 0                       | 0.00 |
|                       | 6008           | 50.0                  | 5747             | 2                          | 0.03    | 1681          | 0                       | 0.00 |
|                       | 6168           | 51.0                  | 9884             | 37                         | 0.37    | 1728          | 4                       | 0.23 |
|                       | 6017           | 59.0                  | 10489            | 0                          | 0.00    | 3015          | 0                       | 0.00 |
|                       | 6020           | 60.0                  | 9427             | 4                          | 0.04    | 2214          | 0                       | 0.00 |
|                       | 6016           | 64.0                  | 11354            | 0                          | 0.00    | 8716          | 1                       | 0.01 |
|                       | 6013           | 65.0                  | 11730            | 0                          | 0.00    | 4665          | 0                       | 0.00 |
|                       | <b>Average</b> | 54.1                  | 8461             | 10                         | 0.12    | 3467          | 2                       | 0.08 |
| <b>SD</b>             | 7.9            | 2763                  | 18               | 0.21                       | 2296    | 3             | 0.15                    |      |
| <b>SEM</b>            | 2.6            | 921                   | 6                | 0.07                       | 765     | 1             | 0.05                    |      |

SUPPLEMENTARY DATA

**Supplementary Table 8. Individual islet endocrine and  $\alpha$ -cell proliferation from T1D pancreata.**

Total synaptophysin+ (Syn) islet endocrine cells (number), Ki67+ Syn+ cells (number and % total),  $\alpha$ -cells (number), Ki67+  $\alpha$ -cells (number and % total). "n/a" indicates that the case sample was not available for this analysis.

SUPPLEMENTARY DATA

|                       |             |                     |            | T1D                   |                            |         |               |                         |      |
|-----------------------|-------------|---------------------|------------|-----------------------|----------------------------|---------|---------------|-------------------------|------|
|                       |             |                     |            | Islet Endocrine Cells |                            |         | α-cells       |                         |      |
| nPOD Case #           | Age (Years) | Years with Diabetes | Syn+ cells | Ki67+ Syn+ cells      | Ki67+ Syn+ cells (% Total) | α-cells | Ki67+ α-cells | Ki67+ α-cells (% Total) |      |
| Children (1.5-13.9)   | 6063        | 4.4                 | 3.0        | 10634                 | 0                          | 0.00    | 7892          | 3                       | 0.04 |
|                       | 6209        | 5.0                 | 0.3        | 5542                  | 8                          | 0.14    | 5355          | 3                       | 0.06 |
|                       | 6062        | 10.7                | 6.0        | 5594                  | 18                         | 0.32    | 3831          | 31                      | 0.81 |
|                       | 6265        | 11.0                | 8.0        | 878                   | 1                          | 0.11    | 1157          | 0                       | 0.00 |
|                       | 6052        | 12.0                | 1.0        | 7993                  | 849                        | 10.62   | 3767          | 24                      | 0.64 |
|                       | 6268        | 12.0                | 3.0        | 8560                  | 56                         | 0.65    | 4527          | 35                      | 0.77 |
|                       | 6264        | 12.0                | 9.0        | 10084                 | 26                         | 0.26    | 5629          | 4                       | 0.07 |
|                       | 6228        | 13.0                | 0.0        | 20857                 | 216                        | 1.04    | 11597         | 110                     | 0.95 |
|                       | 6243        | 13.0                | 5.0        | 3609                  | 4                          | 0.11    | 1199          | 2                       | 0.17 |
|                       | 6113        | 13.1                | 1.6        | 4109                  | 72                         | 1.75    | 4060          | 13                      | 0.32 |
|                       | Average     | 10.6                | 3.7        | 7786                  | 125.0                      | 1.50    | 4901          | 22.5                    | 0.38 |
|                       | SD          | 3.2                 | 3.2        | 5512                  | 262.6                      | 3.25    | 3083          | 33.3                    | 0.37 |
|                       | SEM         | 1.0                 | 1.0        | 1743                  | 83.0                       | 1.03    | 975           | 10.5                    | 0.12 |
| p-value (v. control)  | 0.002       | ////                | 0.06       | 0.98                  | 0.67                       | 0.24    | 0.23          | 0.08                    |      |
| Adolescents (14-20.9) | 6084        | 14.2                | 4.0        | 10617                 | 317                        | 2.99    | 862           | 14                      | 1.62 |
|                       | 6089        | 14.3                | 8.0        | 2608                  | 5                          | 0.19    | 1925          | 2                       | 0.10 |
|                       | 6049        | 15.0                | 10.0       | 7337                  | 16                         | 0.22    | 3985          | 0                       | 0.00 |
|                       | 6083        | 15.2                | 11.0       | 4228                  | 7                          | 0.17    | 3342          | 0                       | 0.00 |
|                       | 6207        | 16.0                | 10.0       | 9625                  | 8                          | 0.08    | 4959          | 5                       | 0.10 |
|                       | 6261        | 16.0                | 14.2       | 18161                 | 1160                       | 6.39    | 21590         | 848                     | 3.93 |
|                       | 6148        | 17.1                | 7.0        | 5275                  | 0                          | 0.00    | 3078          | 2                       | 0.06 |
|                       | 6087        | 17.5                | 4.0        | 3005                  | 8                          | 0.27    | 14064         | 6                       | 0.04 |
|                       | 6145        | 18.0                | 11.0       | 5697                  | 3                          | 0.05    | 3250          | 0                       | 0.00 |
|                       | 6237        | 18.0                | 12.0       | 36085                 | 32                         | 0.09    | 7412          | 7                       | 0.09 |
|                       | 6195        | 19.2                | 5.0        | n/a                   | n/a                        | n/a     | 5724          | 1                       | 0.02 |
|                       | 6161        | 19.2                | 7.0        | 6486                  | 9                          | 0.14    | 5148          | 6                       | 0.12 |
|                       | 6064        | 19.6                | 9.0        | 12291                 | 1                          | 0.01    | 1225          | 0                       | 0.00 |
|                       | 6212        | 20.0                | 5.0        | 25146                 | 38                         | 0.15    | 14384         | 11                      | 0.08 |
|                       | Average     | 17.1                | 8.4        | 11274                 | 123.4                      | 0.83    | 6496          | 64.4                    | 0.44 |
| SD                    | 2.0         | 3.2                 | 9825       | 322.9                 | 1.85                       | 6025    | 225.6         | 1.09                    |      |
| SEM                   | 0.53        | 0.85                | 2626       | 86.3                  | 0.49                       | 1610    | 60.3          | 0.29                    |      |
| p-value (v. control)  | 0.97        | ////                | 0.91       | 0.47                  | 0.53                       | 0.02    | 0.46          | 0.23                    |      |
| Young Adults (21-39)  | 6224        | 21.0                | 1.5        | 13646                 | 11                         | 0.08    | 4825          | 3                       | 0.06 |
|                       | 6198        | 22.0                | 3.0        | 5197                  | 3                          | 0.06    | 3153          | 1                       | 0.03 |
|                       | 6245        | 22.0                | 7.0        | 24760                 | 16                         | 0.06    | 21661         | 9                       | 0.04 |
|                       | 6026        | 22.4                | 14.0       | 2021                  | 1                          | 0.05    | 1793          | 0                       | 0.00 |
|                       | 6070        | 22.6                | 7.0        | 20830                 | 11                         | 0.05    | 17807         | 3                       | 0.02 |
|                       | 6069        | 22.9                | 7.0        | 9097                  | 6                          | 0.07    | 312           | 0                       | 0.00 |
|                       | 6025        | 23.8                | 19.0       | 7190                  | 1                          | 0.01    | 1551          | 1                       | 0.06 |
|                       | 6247        | 24.0                | 0.6        | 10464                 | 0                          | 0.00    | 8170          | 1                       | 0.01 |
|                       | 6211        | 24.0                | 4.0        | 15774                 | 29                         | 0.18    | 5967          | 2                       | 0.03 |
|                       | 6196        | 26.0                | 15.0       | 26754                 | 54                         | 0.20    | 3620          | 10                      | 0.28 |
|                       | 6041        | 26.3                | 23.0       | 14822                 | 5                          | 0.03    | 2502          | 3                       | 0.12 |
|                       | 6039        | 28.7                | 12.0       | 14701                 | 3                          | 0.02    | 1107          | 1                       | 0.09 |
|                       | 6088        | 31.2                | 5.0        | 1837                  | 0                          | 0.00    | 4384          | 0                       | 0.00 |
|                       | 6081        | 31.4                | 15.0       | 1819                  | 1                          | 0.05    | 833           | 0                       | 0.00 |
|                       | 6035        | 32.1                | 28.0       | 16889                 | 4                          | 0.02    | 846           | 1                       | 0.12 |
|                       | 6054        | 35.1                | 30.0       | 5716                  | 0                          | 0.00    | 6999          | 1                       | 0.01 |
|                       | 6038        | 37.2                | 20.0       | 10766                 | 2                          | 0.02    | 8937          | 0                       | 0.00 |
|                       | 6031        | 39.0                | 35.0       | 2614                  | 0                          | 0.00    | 5353          | 0                       | 0.00 |
| Average               | 27.3        | 13.7                | 11383      | 8.2                   | 0.05                       | 5546    | 2.0           | 0.05                    |      |
| SD                    | 5.7         | 10.4                | 7759       | 13.6                  | 0.06                       | 5804    | 2.9           | 0.07                    |      |
| SEM                   | 1.3         | 2.4                 | 1829       | 3.2                   | 0.01                       | 1368    | 0.7           | 0.02                    |      |
| p-value (v. control)  | 0.93        | ////                | 0.81       | 0.13                  | 0.04                       | 0.51    | 0.03          | 0.02                    |      |
| Older Adults (≥40)    | 6150        | 41.2                | 35.0       | 1174                  | 1                          | 0.09    | 1355          | 0                       | 0.00 |
|                       | 6135        | 43.5                | 21.0       | 6832                  | 6                          | 0.09    | 9493          | 7                       | 0.07 |
|                       | 6036        | 49.2                | 34.0       | 9223                  | 1                          | 0.01    | 1639          | 0                       | 0.00 |
|                       | 6138        | 49.2                | 41.0       | 1824                  | 0                          | 0.00    | 1426          | 1                       | 0.07 |
|                       | 6040        | 50.0                | 20.0       | 1608                  | 0                          | 0.00    | 1918          | 0                       | 0.00 |
|                       | Average     | 46.6                | 30.2       | 4132                  | 2                          | 0.04    | 3166          | 1.6                     | 0.03 |
| SD                    | 4.0         | 9.3                 | 3662       | 3                     | 0.05                       | 3544    | 3.0           | 0.04                    |      |
| SEM                   | 1.8         | 4.1                 | 1638       | 1                     | 0.02                       | 1585    | 1.4           | 0.02                    |      |
| p-value (v. control)  | 0.07        | ////                | 0.03       | 0.33                  | 0.42                       | 0.85    | 0.97          | 0.51                    |      |



SUPPLEMENTARY DATA

**Supplementary Table 9. Individual synaptophysin cell proliferation expressed as % of intraislet Ki67+ cells in nondiabetic and T1D pancreata.** Ki67+ Syn+ cells (number; % total intraislet Ki67+ cells), total intraislet Ki67+ cells (number) from highly proliferative samples.

| Control        |             |                  |                              |                      |
|----------------|-------------|------------------|------------------------------|----------------------|
| nPOD Case #    | Age (Years) | Ki67+ Syn+ cells | Total Intraislet Ki67+ cells | Ki67+ Syn+ (% Total) |
| 6232           | 14.0        | 69               | 79                           | 87.34                |
| 6233           | 14.0        | 163              | 183                          | 89.07                |
| 6153           | 15.2        | 44               | 65                           | 67.69                |
| 6075           | 16.0        | 120              | 159                          | 75.47                |
| 6230           | 16.0        | 172              | 181                          | 95.03                |
| 6279           | 19.0        | 270              | 289                          | 93.43                |
| 6179           | 21.8        | 62               | 72                           | 86.11                |
| 6057           | 22.0        | 35               | 41                           | 85.37                |
| 6131           | 24.2        | 382              | 412                          | 92.72                |
| 6235           | 30.0        | 177              | 197                          | 89.85                |
| 6030           | 30.1        | 49               | 60                           | 81.67                |
| 6004           | 33.0        | 178              | 185                          | 96.22                |
| <b>Average</b> | 21.3        | 143              | 160                          | 86.66                |
| <b>SD</b>      | 6.8         | 104              | 109                          | 8.38                 |
| <b>SEM</b>     | 2.0         | 30               | 31                           | 2.42                 |

| T1D                         |             |                     |                  |                              |                      |
|-----------------------------|-------------|---------------------|------------------|------------------------------|----------------------|
| nPOD Case #                 | Age (Years) | Years with Diabetes | Ki67+ Syn+ cells | Total Intraislet Ki67+ cells | Ki67+ Syn+ (% Total) |
| 6052                        | 12.0        | 1.0                 | 510              | 542                          | 94.10                |
| 6268                        | 12.0        | 3.0                 | 56               | 89                           | 62.92                |
| 6228                        | 13.0        | 0.0                 | 226              | 375                          | 60.27                |
| 6113                        | 13.1        | 1.6                 | 60               | 73                           | 82.19                |
| 6084                        | 14.2        | 4.0                 | 284              | 311                          | 91.32                |
| 6261                        | 16.0        | 14.2                | 1160             | 1516                         | 76.52                |
| <b>Average</b>              | 13.4        | 4.0                 | 383              | 484                          | 77.89                |
| <b>SD</b>                   | 1.52        | 5.2                 | 416              | 536                          | 14.13                |
| <b>SEM</b>                  | 0.62        | 2.1                 | 170              | 219                          | 5.77                 |
| <b>p-value (v. control)</b> | 0.01        |                     | 0.07             | 0.05                         | 0.11                 |

SUPPLEMENTARY DATA

**Supplementary Table 10. Regional islet endocrine cell proliferation.** Pancreas region, Syn+ cells (number), total Ki67+ Syn+ cells (number; % total).

| nPOD Case #    | Age (Years) | Pancreas Sample Region 1 | Syn+ cells | Ki67+ Syn+ cells | Ki67+ Syn+ (% Total) | Pancreas Sample Region 2 | Syn+ cells | Ki67+ Syn+ cells | Ki67+ Syn+ (% Total) |
|----------------|-------------|--------------------------|------------|------------------|----------------------|--------------------------|------------|------------------|----------------------|
| 6075           | 16          | Head                     | 10664      | 120              | 1.13                 | Tail                     | 9300       | 104              | 1.12                 |
| 6279           | 19          | Body                     | 12342      | 270              | 2.19                 | Tail                     | 19869      | 540              | 2.72                 |
| 6029           | 24          | Head                     | 8614       | 3                | 0.03                 | Tail                     | 15098      | 2                | 0.01                 |
| 6131           | 24.2        | Head                     | 17130      | 377              | 2.20                 | Tail                     | 24758      | 752              | 3.04                 |
| <b>Average</b> | 20.8        | n/a                      | 12188      | 193              | 1.39                 | n/a                      | 17256      | 350              | 1.72                 |
| <b>SD</b>      | 4.0         | n/a                      | 3631       | 165              | 1.03                 | n/a                      | 6610       | 356              | 1.41                 |
| <b>SEM</b>     | 2.0         | n/a                      | 1815       | 82               | 0.52                 | n/a                      | 3305       | 178              | 0.71                 |

SUPPLEMENTARY DATA

**Supplementary Table 11. Average  $\alpha$ -cell number per islet cross section of non-diabetic and T1D samples.  $\alpha$ -cells (number; per islet), Ki67+  $\alpha$ -cells (number; per islet), and islets (number).**

|                            | Control        |             |                 |                       |        |                             |                                   | T1D                         |             |                     |                 |                       |        |                             |                                   |
|----------------------------|----------------|-------------|-----------------|-----------------------|--------|-----------------------------|-----------------------------------|-----------------------------|-------------|---------------------|-----------------|-----------------------|--------|-----------------------------|-----------------------------------|
|                            | nPOD Case #    | Age (Years) | $\alpha$ -cells | Ki67+ $\alpha$ -cells | Islets | $\alpha$ -cells (per islet) | Ki67+ $\alpha$ -cells (per islet) | nPOD Case #                 | Age (Years) | Years with Diabetes | $\alpha$ -cells | Ki67+ $\alpha$ -cells | Islets | $\alpha$ -cells (per islet) | Ki67+ $\alpha$ -cells (per islet) |
| Children (1.5-13.9)        | 6103           | 1.5         | 2133            | 44                    | 101    | 21                          | 2.1                               | 6063                        | 4.4         | 3.0                 | 7892            | 3                     | 167    | 47                          | 0.02                              |
|                            | 6107           | 2.2         | 3239            | 218                   | 110    | 29                          | 6.7                               | 6209                        | 5.0         | 0.3                 | 5355            | 3                     | 151    | 35                          | 0.02                              |
|                            | 6094           | 2.9         | 2217            | 3                     | 73     | 30                          | 0.1                               | 6062                        | 10.7        | 6.0                 | 3831            | 31                    | 116    | 33                          | 0.27                              |
|                            | 6106           | 2.9         | 8106            | 19                    | 276    | 29                          | 0.2                               | 6265                        | 11.0        | 8.0                 | 1157            | 0                     | 59     | 20                          | 0.00                              |
|                            | 6005           | 5.0         | 992             | 0                     | 107    | 9                           | 0.0                               | 6052                        | 12.0        | 1.0                 | 3767            | 24                    | 52     | 72                          | 0.46                              |
|                            | 6112           | 6.3         | 3722            | 39                    | 105    | 35                          | 1.0                               | 6268                        | 12.0        | 3.0                 | 4527            | 35                    | 142    | 32                          | 0.25                              |
|                            | 8007           | 9.0         | 2971            | 76                    | 113    | 26                          | 2.6                               | 6264                        | 12.0        | 9.0                 | 5629            | 4                     | 267    | 21                          | 0.01                              |
|                            | 6276           | 10.0        | 3325            | 33                    | 66     | 50                          | 1.0                               | 6228                        | 13.0        | 0.0                 | 11597           | 110                   | 301    | 39                          | 0.37                              |
|                            | <b>Average</b> | 5.0         | 3338            | 54                    | 119    | 29                          | 1.7                               | 6243                        | 13.0        | 5.0                 | 1199            | 2                     | 45     | 27                          | 0.04                              |
|                            | <b>SD</b>      | 3.2         | 2112            | 71                    | 66     | 12                          | 2.2                               | 6113                        | 13.1        | 1.6                 | 4060            | 13                    | 56     | 73                          | 0.23                              |
| <b>SEM</b>                 | 1.1            | 747         | 25              | 23                    | 4      | 0.8                         | <b>Average</b>                    | 10.6                        | 3.7         | 4901                | 23              | 136                   | 40     | 0.17                        |                                   |
| Adolescents (14-20.9)      | 6232           | 14.0        | 2882            | 42                    | 198    | 15                          | 1.5                               | <b>SD</b>                   | 3.2         | 3.2                 | 3083            | 33                    | 90     | 19                          | 0.17                              |
|                            | 6233           | 14.0        | 1908            | 21                    | 135    | 14                          | 1.1                               | <b>SEM</b>                  | 0.9         | 0.9                 | 882             | 10                    | 26     | 5                           | 0.05                              |
|                            | 6099           | 14.2        | 4595            | 2                     | 61     | 75                          | 0.0                               | <b>p-value (v. control)</b> | 0.002       | ///                 | 0.24            | 0.23                  | 0.67   | 0.18                        | 0.04                              |
|                            | 6153           | 15.2        | 1511            | 36                    | 59     | 26                          | 2.4                               | 6084                        | 14.2        | 4.0                 | 862             | 14                    | 29     | 30                          | 0.48                              |
|                            | 6075           | 16.0        | 3740            | 67                    | 55     | 68                          | 1.8                               | 6089                        | 14.3        | 8.0                 | 1925            | 2                     | 24     | 80                          | 0.08                              |
|                            | 6096           | 16.0        | 2176            | 3                     | 42     | 52                          | 0.1                               | 6049                        | 15.0        | 10.0                | 3985            | 0                     | 46     | 87                          | 0.00                              |
|                            | 6230           | 16.0        | 2002            | 68                    | 151    | 13                          | 3.4                               | 6083                        | 15.2        | 11.0                | 3342            | 0                     | 56     | 60                          | 0.00                              |
|                            | 6227           | 17.0        | 824             | 1                     | 54     | 15                          | 0.1                               | 6207                        | 16.0        | 10.0                | 4959            | 5                     | 152    | 33                          | 0.03                              |
|                            | 6271           | 17.0        | 2185            | 1                     | 204    | 11                          | 0.0                               | 6261                        | 16.0        | 14.2                | 21590           | 848                   | 303    | 71                          | 2.80                              |
|                            | 6098           | 17.8        | 4366            | 1                     | 78     | 56                          | 0.0                               | 6148                        | 17.1        | 7.0                 | 3078            | 2                     | 211    | 15                          | 0.01                              |
|                            | 6253           | 19.0        | 1691            | 5                     | 180    | 9                           | 0.3                               | 6087                        | 17.5        | 4.0                 | 14064           | 6                     | 193    | 73                          | 0.03                              |
|                            | 6279           | 19.0        | 1067            | 22                    | 133    | 8                           | 2.1                               | 6145                        | 18.0        | 11.0                | 3250            | 0                     | 36     | 90                          | 0.00                              |
|                            | 6234           | 20.0        | 4135            | 39                    | 182    | 23                          | 0.9                               | 6237                        | 18.0        | 12.0                | 7412            | 7                     | 287    | 26                          | 0.02                              |
|                            | 6238           | 20.0        | 4261            | 2                     | 256    | 17                          | 0.0                               | 6195                        | 19.2        | 5.0                 | 5724            | 1                     | 138    | 41                          | 0.01                              |
|                            | 6174           | 20.8        | 1918            | 2                     | 91     | 21                          | 0.1                               | 6161                        | 19.2        | 7.0                 | 5148            | 6                     | 171    | 30                          | 0.04                              |
|                            | <b>Average</b> | 17.1        | 2617            | 21                    | 125    | 28                          | 0.9                               | 6064                        | 19.6        | 9.0                 | 1225            | 0                     | 36     | 34                          | 0.00                              |
| <b>SD</b>                  | 2.3            | 1275        | 24              | 68                    | 23     | 1.1                         | 6212                              | 20.0                        | 5.0         | 14384               | 11              | 521                   | 28     | 0.02                        |                                   |
| <b>SEM</b>                 | 0.59           | 329         | 6               | 18                    | 6      | 0.3                         | <b>Average</b>                    | 17.1                        | 8.4         | 6496                | 64              | 157                   | 50     | 0.25                        |                                   |
| Young Adults (21-39)       | 6024           | 21.0        | 585             | 0                     | 32     | 18                          | 0.0                               | <b>SD</b>                   | 2.00        | 3.18                | 6025            | 226                   | 142    | 26                          | 0.74                              |
|                            | 6179           | 21.8        | 2848            | 15                    | 110    | 26                          | 0.5                               | <b>SEM</b>                  | 0.53        | 0.85                | 1610            | 60                    | 38     | 7                           | 0.20                              |
|                            | 6001           | 22.0        | 11414           | 8                     | 291    | 39                          | 0.1                               | <b>p-value (v. control)</b> | 4.28        | ///                 | 0.02            | 0.46                  | 0.44   | 0.02                        | 0.06                              |
|                            | 6057           | 22.0        | 2236            | 4                     | 74     | 30                          | 0.2                               | 6224                        | 21.0        | 1.5                 | 4825            | 3                     | 210    | 23                          | 0.01                              |
|                            | 6162           | 22.7        | 1637            | 7                     | 53     | 31                          | 0.4                               | 6198                        | 22.0        | 3.0                 | 3153            | 1                     | 185    | 17                          | 0.01                              |
|                            | 6003           | 23.0        | 5126            | 9                     | 131    | 39                          | 0.2                               | 6245                        | 22.0        | 7.0                 | 21661           | 9                     | 398    | 54                          | 0.02                              |
|                            | 6029           | 24.0        | 5352            | 1                     | 186    | 29                          | 0.0                               | 6026                        | 22.4        | 14.0                | 1793            | 0                     | 35     | 51                          | 0.00                              |
|                            | 6131           | 24.2        | 2334            | 79                    | 36     | 65                          | 3.4                               | 6070                        | 22.6        | 7.0                 | 17807           | 3                     | 145    | 123                         | 0.02                              |
|                            | 6053           | 25.0        | 3509            | 13                    | 74     | 47                          | 0.4                               | 6069                        | 22.9        | 7.0                 | 312             | 0                     | 16     | 20                          | 0.00                              |
|                            | 6126           | 25.2        | 1014            | 9                     | 62     | 16                          | 0.9                               | 6025                        | 23.8        | 19.0                | 1551            | 1                     | 95     | 16                          | 0.01                              |
|                            | 6058           | 27.0        | 2240            | 1                     | 59     | 38                          | 0.0                               | 6247                        | 24.0        | 0.6                 | 8170            | 1                     | 263    | 31                          | 0.00                              |
|                            | 6048           | 30.0        | 3213            | 0                     | 99     | 32                          | 0.0                               | 6211                        | 24.0        | 4.0                 | 5967            | 2                     | 181    | 33                          | 0.01                              |
|                            | 6235           | 30.0        | 10694           | 115                   | 177    | 60                          | 1.1                               | 6196                        | 26.0        | 15.0                | 3620            | 10                    | 234    | 15                          | 0.04                              |
|                            | 6030           | 30.1        | 2088            | 29                    | 88     | 24                          | 1.4                               | 6041                        | 26.3        | 23.0                | 2502            | 3                     | 54     | 46                          | 0.06                              |
|                            | 6229           | 31.0        | 14655           | 9                     | 323    | 45                          | 0.1                               | 6039                        | 28.7        | 12.0                | 1107            | 1                     | 39     | 28                          | 0.03                              |
|                            | 6035           | 32.0        | 2594            | 0                     | 323    | 8                           | 0.0                               | 6088                        | 31.2        | 5.0                 | 4384            | 0                     | 145    | 30                          | 0.00                              |
| 6004                       | 33.0           | 3515        | 69              | 111                   | 32     | 2.0                         | 6081                              | 31.4                        | 15.0        | 833                 | 0               | 66                    | 13     | 0.00                        |                                   |
| 6002                       | 39.0           | 4967        | 4               | 142                   | 35     | 0.1                         | 6035                              | 32.1                        | 28.0        | 846                 | 1               | 32                    | 26     | 0.03                        |                                   |
| 6015                       | 39.0           | 5127        | 0               | 115                   | 45     | 0.0                         | 6054                              | 35.1                        | 30.0        | 6999                | 1               | 67                    | 104    | 0.01                        |                                   |
| <b>Average</b>             | 27.5           | 4481        | 20              | 131                   | 35     | 0.6                         | 6038                              | 37.2                        | 20.0        | 8937                | 0               | 172                   | 52     | 0.00                        |                                   |
| <b>SD</b>                  | 5.6            | 3782        | 32              | 91                    | 14     | 0.9                         | 6031                              | 39.0                        | 35.0        | 5353                | 0               | 101                   | 53     | 0.00                        |                                   |
| <b>SEM</b>                 | 1.3            | 868         | 7               | 21                    | 3      | 0.2                         | <b>Average</b>                    | 27.3                        | 13.7        | 5546                | 2.0             | 135.4                 | 41     | 0.01                        |                                   |
| Older Adults ( $\geq 40$ ) | 6009           | 45.0        | 2134            | 9                     | 53     | 40                          | 0.4                               | <b>SD</b>                   | 5.7         | 10.4                | 5804            | 2.9                   | 100.0  | 30                          | 0.02                              |
|                            | 6011           | 46.0        | 4831            | 1                     | 154    | 31                          | 0.0                               | <b>SEM</b>                  | 1.3         | 2.4                 | 1368            | 0.7                   | 23.6   | 7                           | 0.00                              |
|                            | 6010           | 47.0        | 2223            | 0                     | 109    | 20                          | 0.0                               | <b>p-value (v. control)</b> | 0.93        | ///                 | 0.51            | 0.03                  | 0.88   | 0.42                        | 0.01                              |
|                            | 6008           | 50.0        | 1681            | 0                     | 52     | 32                          | 0.0                               | 6150                        | 41.2        | 35.0                | 1355            | 0                     | 35     | 39                          | 0.00                              |
|                            | 6168           | 51.0        | 1728            | 4                     | 101    | 17                          | 0.2                               | 6135                        | 43.5        | 21.0                | 9493            | 7                     | 133    | 71                          | 0.05                              |
|                            | 6017           | 59.0        | 3015            | 0                     | 128    | 24                          | 0.0                               | 6036                        | 49.2        | 34.0                | 1639            | 0                     | 32     | 51                          | 0.00                              |
|                            | 6020           | 60.0        | 2214            | 0                     | 71     | 31                          | 0.0                               | 6138                        | 49.2        | 41.0                | 1426            | 1                     | 72     | 20                          | 0.01                              |
|                            | 6016           | 64.0        | 8716            | 1                     | 343    | 25                          | 0.0                               | 6040                        | 50.0        | 20.0                | 1918            | 0                     | 35     | 55                          | 0.00                              |
|                            | 6013           | 65.0        | 4665            | 0                     | 187    | 25                          | 0.0                               | <b>Average</b>              | 46.6        | 30.2                | 3166            | 2                     | 61     | 47                          | 0.01                              |
|                            | <b>Average</b> | 54.1        | 3467            | 2                     | 133    | 27                          | 0.1                               | <b>SD</b>                   | 4.0         | 9.3                 | 3544            | 3.0                   | 43.3   | 19                          | 0.02                              |
| <b>SD</b>                  | 7.9            | 2296        | 3               | 91                    | 7      | 0.1                         | <b>SEM</b>                        | 1.8                         | 4.1         | 1585                | 1.4             | 19.4                  | 9      | 0.01                        |                                   |
| <b>SEM</b>                 | 2.6            | 765         | 1               | 30                    | 2      | 0.0                         | <b>p-value (v. control)</b>       | 0.07                        | ///         | 0.85                | 0.97            | 0.13                  | 0.02   | 0.38                        |                                   |



SUPPLEMENTARY DATA

**Supplementary Table 12. Individual  $\alpha$ -cell proliferation expressed as % of intraislet Ki67+ cells in non-diabetic and T1D pancreata.** Ki67+  $\alpha$ -cells (number; % total intraislet Ki67+ cells), total intraislet Ki67+ cells (number) from highly proliferative samples.

| Control        |             |                       |                              |                                 |
|----------------|-------------|-----------------------|------------------------------|---------------------------------|
| nPOD Case #    | Age (Years) | Ki67+ $\alpha$ -cells | Total Intraislet Ki67+ cells | Ki67+ $\alpha$ -cells (% Total) |
| 6232           | 14.0        | 42                    | 189                          | 22.22                           |
| 6233           | 14.0        | 21                    | 102                          | 20.59                           |
| 6153           | 15.2        | 24                    | 136                          | 17.65                           |
| 6075           | 16.0        | 13                    | 92                           | 14.13                           |
| 6230           | 16.0        | 68                    | 139                          | 48.92                           |
| 6279           | 19.0        | 22                    | 126                          | 17.46                           |
| 6179           | 21.8        | 15                    | 86                           | 17.44                           |
| 6057           | 22.0        | 4                     | 23                           | 17.39                           |
| 6131           | 24.2        | 79                    | 223                          | 35.43                           |
| 6235           | 30.0        | 115                   | 378                          | 30.42                           |
| 6030           | 30.1        | 29                    | 102                          | 28.43                           |
| 6004           | 33.0        | 69                    | 392                          | 17.60                           |
| <b>Average</b> | 21.3        | 42                    | 166                          | 23.97                           |
| <b>SD</b>      | 6.8         | 34                    | 114                          | 10.16                           |
| <b>SEM</b>     | 2.0         | 10                    | 33                           | 2.93                            |

| T1D                         |             |                     |                       |                              |                                 |
|-----------------------------|-------------|---------------------|-----------------------|------------------------------|---------------------------------|
| nPOD Case #                 | Age (Years) | Years with Diabetes | Ki67+ $\alpha$ -cells | Total Intraislet Ki67+ cells | Ki67+ $\alpha$ -cells (% Total) |
| 6052                        | 12.0        | 1.0                 | 24                    | 699                          | 3.43                            |
| 6268                        | 12.0        | 3.0                 | 35                    | 119                          | 29.41                           |
| 6228                        | 13.0        | 0.0                 | 110                   | 423                          | 26.00                           |
| 6113                        | 13.1        | 1.6                 | 3                     | 8                            | 37.50                           |
| 6084                        | 14.2        | 4.0                 | 68                    | 163                          | 41.72                           |
| 6261                        | 16.0        | 14.2                | 848                   | 1988                         | 42.66                           |
| <b>Average</b>              | 13.4        | 4.0                 | 181                   | 567                          | 30.12                           |
| <b>SD</b>                   | 1.52        | 5.2                 | 329                   | 739                          | 14.67                           |
| <b>SEM</b>                  | 0.62        | 2.1                 | 134                   | 302                          | 5.99                            |
| <b>p-value (v. control)</b> | 0.01        |                     | 0.15                  | 0.08                         | 0.31                            |

SUPPLEMENTARY DATA

**Supplementary Table 13. Individual PP, somatostatin, and ghrelin cell proliferation from non-diabetic and T1D pancreata.** Ki67+ PP+ cells (number; % total PP cells), total PP+ cells (number), Ki67+ somatostatin+ cells (number: % total somatostatin cells), total somatostatin+ cells (number), Ki67+ ghrelin+ cells (numbers; % total ghrelin cells), total ghrelin+ cells (number) counted. "n/a" indicates the measurement is not applicable for the case or the case sample was not available for this analysis.

|                      | nPOD Case # | Age (Years) | Years with Diabetes | PP Cells        |                 |                           | SS Cells                  |                           |                                     | Ghrelin Cells        |                      |                                |
|----------------------|-------------|-------------|---------------------|-----------------|-----------------|---------------------------|---------------------------|---------------------------|-------------------------------------|----------------------|----------------------|--------------------------------|
|                      |             |             |                     | Ki67+ PP+ Cells | Total PP+ Cells | Ki67+ PP+ Cells (% total) | Ki67+ Somatostatin+ Cells | Total Somatostatin+ Cells | Ki67+ Somatostatin+ Cells (% total) | Ki67+ Ghrelin+ Cells | Total Ghrelin+ Cells | Ki67+ Ghrelin+ Cells (% total) |
| Control              | 6233        | 14.0        | n/a                 | 0               | 174             | 0.00                      | 13                        | 4378                      | 0.30                                | 0                    | 267                  | 0.00                           |
|                      | 6099        | 14.2        | n/a                 | n/a             | n/a             | n/a                       | 0                         | 546                       | 0.00                                | n/a                  | n/a                  | n/a                            |
|                      | 6153        | 15.2        | n/a                 | 7               | 1011            | 0.69                      | 2                         | 1023                      | 0.20                                | 0                    | 217                  | 0.00                           |
|                      | 6075        | 16.0        | n/a                 | 1               | 190             | 0.53                      | 2                         | 1132                      | 0.18                                | 0                    | 120                  | 0.00                           |
|                      | 6096        | 16.0        | n/a                 | 0               | 259             | 0.00                      | 1                         | 1360                      | 0.07                                | 0                    | 208                  | 0.00                           |
|                      | 6098        | 17.8        | n/a                 | 0               | 687             | 0.00                      | 0                         | 1528                      | 0.00                                | 0                    | 60                   | 0.00                           |
|                      | Average     | 15.5        |                     | 2               | 537             | 0.30                      | 3                         | 1661                      | 0.12                                | 0                    | 151                  | 0.00                           |
|                      | SD          | 1.4         |                     | 3               | 371             | 0.34                      | 5                         | 1373                      | 0.12                                | 0                    | 83                   | 0.00                           |
| SEM                  | 0.57        |             | 1                   | 151             | 0.14            | 2                         | 560                       | 0.05                      | 0                                   | 34                   | 0.00                 |                                |
| T1D                  | 6052        | 12.0        | 1                   | 0               | 296             | 0.00                      | 4                         | 905                       | 0.44                                | 0                    | 64                   | 0.00                           |
|                      | 6113        | 13.1        | 1.6                 | 0               | 176             | 0.00                      | 0                         | 1167                      | 0.00                                | 0                    | 129                  | 0.00                           |
|                      | 6084        | 14.2        | 4                   | 0               | 218             | 0.00                      | 3                         | 1936                      | 0.15                                | 0                    | 68                   | 0.00                           |
|                      | 6089        | 14.3        | 8                   | 0               | 52              | 0.00                      | 0                         | 676                       | 0.00                                | 0                    | 43                   | 0.00                           |
|                      | 6049        | 15.0        | 10                  | 0               | 0               | 0.00                      | 1                         | 1284                      | 0.08                                | 0                    | 202                  | 0.00                           |
|                      | 6083        | 15.2        | 11                  | 0               | 71              | 0.00                      | 1                         | 1975                      | 0.05                                | 0                    | 145                  | 0.00                           |
|                      | 6087        | 17.5        | 4                   | 0               | 135             | 0.00                      | 0                         | 0                         | 0.00                                | 0                    | 85                   | 0.00                           |
|                      | 6145        | 18.0        | 11                  | 0               | 104             | 0.00                      | 1                         | 998                       | 0.10                                | 0                    | 27                   | 0.00                           |
|                      | 6064        | 19.6        | 9                   | 0               | 36              | 0.00                      | 0                         | 0                         | 0.00                                | 1                    | 35                   | 2.86                           |
|                      | Average     | 15.4        | 6.6                 | 0               | 121             | 0.00                      | 1                         | 993                       | 0.09                                | 0                    | 89                   | 0.32                           |
|                      | SD          | 2.5         | 4.0                 | 0               | 95              | 0.00                      | 1                         | 711                       | 0.14                                | 0                    | 59                   | 0.95                           |
| SEM                  | 0.82        | 1.3         | 0                   | 32              | 0.00            | 0                         | 237                       | 0.05                      | 0                                   | 20                   | 0.32                 |                                |
| p-value (v. control) | 0.93        |             |                     | 0.13            | 0.02            | 0.05                      | 0.30                      | 0.24                      | 0.66                                | 0.48                 | 0.04                 | 0.48                           |

SUPPLEMENTARY DATA

**Supplementary Table 14. Individual PP, somatostatin, and ghrelin cell proliferation as a percentage of intraislet proliferation from non-diabetic and T1D pancreata.** Ki67+ PP cells (number; % Total), total Intraislet Ki67+ cells per sample analysis (number), Ki67+ somatostatin+ cells (number; % Total), Ki67+ ghrelin+ cells (numbers; % Total) from highly proliferative samples. "n/a" indicates the measurement is not applicable for the case or the case sample was not available for this analysis. Cross-hatched boxes indicates that the measurement could not be calculated.

|         | nPOD Case #          | Age (Years) | Years with Diabetes | PP Cells        |                        |                           | SS Cells                  |                        |                                     | Ghrelin Cells        |                        |                                |
|---------|----------------------|-------------|---------------------|-----------------|------------------------|---------------------------|---------------------------|------------------------|-------------------------------------|----------------------|------------------------|--------------------------------|
|         |                      |             |                     | Ki67+ PP+ Cells | Intraislet Ki67+ Cells | Ki67+ PP+ Cells (% Total) | Ki67+ Somatostatin+ Cells | Intraislet Ki67+ Cells | Ki67+ Somatostatin+ Cells (% Total) | Ki67+ Ghrelin+ Cells | Intraislet Ki67+ Cells | Ki67+ Ghrelin+ Cells (% Total) |
| Control | 6233                 | 14.0        | n/a                 | 0               | 41                     | 0.00                      | 13                        | 272                    | 4.78                                | 0                    | 45                     | 0.00                           |
|         | 6153                 | 15.2        | n/a                 | 16              | 130                    | 12.31                     | 2                         | 80                     | 2.50                                | 0                    | 61                     | 0.00                           |
|         | 6075                 | 16.0        | n/a                 | 1               | 20                     | 5.00                      | 2                         | 12                     | 16.67                               | 0                    | 38                     | 0.00                           |
|         | Average              | 15.1        |                     | 6               | 64                     | 6                         | 6                         | 121                    | 8                                   | 0                    | 48                     | 0.00                           |
|         | SD                   | 1.0         |                     | 9               | 58                     | 6                         | 6                         | 135                    | 8                                   | 0                    | 12                     | 0                              |
|         | SEM                  | 0.58        |                     | 5               | 34                     | 4                         | 4                         | 78                     | 4                                   | 0                    | 7                      | 0                              |
| T1D     | 6052                 | 12.0        | 1                   | 0               | 99                     | 0.00                      | 4                         | 429                    | 0.93                                | 0                    | 144                    | 0.00                           |
|         | 6113                 | 13.1        | 1.6                 | 0               | 1                      | 0.00                      | 0                         | 18                     | 0.00                                | 0                    | 19                     | 0.00                           |
|         | 6084                 | 14.2        | 4                   | 0               | 21                     | 0.00                      | 3                         | 41                     | 7.32                                | 0                    | 32                     | 0.00                           |
|         | Average              | 13.1        | 2.2                 | 0               | 40                     | 0.00                      | 2                         | 163                    | 2.75                                | 0                    | 65                     | 0.00                           |
|         | SD                   | 1.1         | 1.6                 | 0               | 52                     | 0                         | 2                         | 231                    | 3.98                                | 0                    | 69                     | 0.00                           |
|         | SEM                  | 0.64        | 0.92                | 0               | 30                     | 0.00                      | 1                         | 133                    | 2.30                                | 0                    | 40                     | 0.00                           |
|         | p-value (v. control) | 0.0844      |                     | 0.33            | 0.63                   | 0.18                      | 0.44                      | 0.80                   | 0.35                                |                      | 0.69                   |                                |



SUPPLEMENTARY DATA

**Supplementary Table 15. Individual pancreas weights, pancreas transit times, and duration of ICU stay for non-diabetic and T1D individuals.** Case number, age (years), pancreas weight (g), pancreas transit time (h), and duration of ICU stay (days). "n/a" indicates measurements were not available for that case. Cross-hatched boxes indicates that the measurement could not be calculated.

SUPPLEMENTARY DATA

|                       |                | Control     |             |                 |                           |                             |
|-----------------------|----------------|-------------|-------------|-----------------|---------------------------|-----------------------------|
|                       |                | nPOD Case # | Age (Years) | Pancreas Weight | Pancreas Transit Time (h) | Duration of ICU Stay (Days) |
| Infants (0-1.4)       | 6200           | 0.005       | 4.290       | 24.27           | 2.4                       |                             |
|                       | 6214           | 0.014       | 1.000       | 11.85           | 5.95                      |                             |
|                       | 6164           | 0.030       | 2.980       | 16.33           | 13.75                     |                             |
|                       | 6218           | 0.080       | 0.730       | 19.55           | 6.01                      |                             |
|                       | 6222           | 0.170       | 5.770       | 14.80           | 3.37                      |                             |
|                       | 6117           | 0.330       | 5.400       | 15.67           | 3.32                      |                             |
|                       | 6115           | 0.420       | 3.900       | 14.13           | 11.19                     |                             |
|                       | 6092           | 0.500       | 5.300       | 10.83           | 4.11                      |                             |
|                       | <b>Average</b> | 0.194       | 3.67        | 15.93           | 6.26                      |                             |
|                       | <b>SD</b>      | 0.197       | 1.95        | 4.31            | 4.09                      |                             |
| <b>SEM</b>            | 0.070          | 0.69        | 1.52        | 1.45            |                           |                             |
| Children (1.5-13.9)   | 6103           | 1.5         | 10.4        | 10.55           | 5.89                      |                             |
|                       | 6107           | 2.2         | 15.9        | 23.25           | 3.74                      |                             |
|                       | 6094           | 2.9         | 21.2        | 15.37           | 5.08                      |                             |
|                       | 6106           | 2.9         | 16.3        | 18.85           | 2.89                      |                             |
|                       | 6005           | 5.0         | n/a         | 24.93           | 6.38                      |                             |
|                       | 6112           | 6.3         | 30.0        | 18.90           | 2.05                      |                             |
|                       | 6007           | 9.0         | n/a         | 4.40            | 6.93                      |                             |
|                       | 6278           | 10.0        | 33.6        | 14.92           | 1.84                      |                             |
|                       | <b>Average</b> | 5.0         | 21.22       | 16.40           | 4.35                      |                             |
|                       | <b>SD</b>      | 3.2         | 8.95        | 6.69            | 1.99                      |                             |
| <b>SEM</b>            | 1.1            | 3.16        | 2.37        | 0.70            |                           |                             |
| Adolescents (14-20.9) | 6232           | 14.0        | 49.4        | 13.72           | 3.03                      |                             |
|                       | 6233           | 14.0        | 60.9        | 18.87           | 7.42                      |                             |
|                       | 6099           | 14.2        | 85.6        | 14.83           | 2.05                      |                             |
|                       | 6153           | 15.2        | 67.8        | n/a             | n/a                       |                             |
|                       | 6075           | 16.0        | 47.3        | 4.03            | 4.82                      |                             |
|                       | 6096           | 16.0        | 51.5        | 11.17           | 3.28                      |                             |
|                       | 6230           | 16.0        | 66.3        | 15.78           | 3.03                      |                             |
|                       | 6227           | 17.0        | 60.4        | 20.73           | 11.17                     |                             |
|                       | 6271           | 17.0        | 98.0        | 15.32           | 0.48                      |                             |
|                       | 6098           | 17.8        | 91.1        | 16.92           | 1.74                      |                             |
| 6253                  | 19.0           | 85.3        | 13.05       | 6.14            |                           |                             |
| 6279                  | 19.0           | 80.2        | 45.25       | 3.38            |                           |                             |
| 6234                  | 20.0           | 49.9        | 16.45       | 3.77            |                           |                             |
| 6238                  | 20.0           | 91.5        | 22.22       | 1.66            |                           |                             |
| 6174                  | 20.8           | 79.3        | 10.07       | 0.82            |                           |                             |
| <b>Average</b>        | 17.1           | 70.95       | 17.03       | 3.77            |                           |                             |
| <b>SD</b>             | 2.28           | 17.37       | 9.32        | 2.87            |                           |                             |
| <b>SEM</b>            | 0.59           | 4.49        | 2.41        | 0.74            |                           |                             |
| Young Adults (21-39)  | 6024           | 21.0        | n/a         | n/a             | n/a                       |                             |
|                       | 6179           | 21.8        | 72.4        | 24.40           | 13.96                     |                             |
|                       | 6001           | 22.0        | n/a         | 1.75            | 1.7                       |                             |
|                       | 6057           | 22.0        | 104.4       | 11.82           | 8.62                      |                             |
|                       | 6162           | 22.7        | 81.5        | 20.05           | 1.52                      |                             |
|                       | 6003           | 23.0        | n/a         | 1.40            | 2.77                      |                             |
|                       | 6029           | 24.0        | 79.3        | 16.67           | n/a                       |                             |
|                       | 6131           | 24.2        | 108.9       | 18.78           | 1.9                       |                             |
|                       | 6053           | 25.0        | 19.4        | 10.80           | 2.68                      |                             |
|                       | 6126           | 25.2        | 80.2        | 11.22           | 4.88                      |                             |
| 6058                  | 27.0           | 52.7        | 13.15       | 15.36           |                           |                             |
| 6048                  | 30.0           | 139.0       | 6.13        | 1.34            |                           |                             |
| 6235                  | 30.0           | 102.3       | 17.00       | 2.56            |                           |                             |
| 6030                  | 30.1           | 96.3        | 4.90        | 4.78            |                           |                             |
| 6229                  | 31.0           | 45.6        | 13.92       | 3.12            |                           |                             |
| 6034                  | 32.0           | 75.4        | 27.42       | 2.88            |                           |                             |
| 6004                  | 33.0           | n/a         | 5.92        | 4.55            |                           |                             |
| 6002                  | 39.0           | n/a         | 1.50        | 3.88            |                           |                             |
| 6015                  | 39.0           | n/a         | 4.95        | 3.33            |                           |                             |
| <b>Average</b>        | 27.5           | 81.34       | 11.76       | 4.70            |                           |                             |
| <b>SD</b>             | 5.58           | 30.73       | 7.88        | 4.14            |                           |                             |
| <b>SEM</b>            | 1.28           | 7.05        | 1.81        | 0.95            |                           |                             |
| Older Adults (≥40)    | 6009           | 45.0        | n/a         | n/a             | 7.17                      |                             |
|                       | 6011           | 46.0        | n/a         | n/a             | 28.15                     |                             |
|                       | 6010           | 47.0        | n/a         | 16.08           | 0.95                      |                             |
|                       | 6008           | 50.0        | n/a         | n/a             | 10.46                     |                             |
|                       | 6168           | 51.0        | 88.8        | 19.75           | 6.91                      |                             |
|                       | 6017           | 59.0        | n/a         | 4.92            | 1.36                      |                             |
|                       | 6020           | 60.0        | n/a         | 2.95            | 4.43                      |                             |
|                       | 6016           | 64.0        | n/a         | 12.13           | 2.67                      |                             |
|                       | 6013           | 65.0        | n/a         | 5.20            | 4.36                      |                             |
|                       | <b>Average</b> | 54.1        | 88.76       | 10.17           | 7.38                      |                             |
| <b>SD</b>             | 7.9            |             | 6.86        | 8.36            |                           |                             |
| <b>SEM</b>            | 2.6            |             | 2.29        | 2.79            |                           |                             |

|                             |                             | T1D         |             |                     |                     |                           |                             |
|-----------------------------|-----------------------------|-------------|-------------|---------------------|---------------------|---------------------------|-----------------------------|
|                             |                             | nPOD Case # | Age (Years) | Years with Diabetes | Pancreas Weight (g) | Pancreas Transit Time (h) | Duration of ICU Stay (Days) |
| Children (1.5-13.9)         | 6063                        | 4.4         | 3.0         | 11.20               | 15.13               | 3.27                      |                             |
|                             | 6209                        | 5.0         | 0.3         | 12.50               | 35.00               | 0.14                      |                             |
|                             | 6062                        | 10.7        | 6.0         | 18.20               | 20.97               | 4.26                      |                             |
|                             | 6265                        | 11.0        | 8.0         | 18.48               | 19.98               | 3.51                      |                             |
|                             | 6052                        | 12.0        | 1.0         | 22.10               | 14.75               | 1.84                      |                             |
|                             | 6268                        | 12.0        | 3.0         | 41.1                | 17.50               | 3.38                      |                             |
|                             | 6264                        | 12.0        | 9.0         | 20.35               | 20.20               | 2.13                      |                             |
|                             | 6228                        | 13.0        | 0.0         | 30.35               | 15.55               | 10.04                     |                             |
|                             | 6243                        | 13.0        | 5.0         | 29.35               | 13.48               | 4.96                      |                             |
|                             | 6113                        | 13.1        | 1.6         | 33.50               | 9.08                | 5.10                      |                             |
| <b>Average</b>              | 10.6                        | 3.7         | 23.71       | 18.16               | 3.86                |                           |                             |
| <b>SD</b>                   | 3.2                         | 3.2         | 9.59        | 6.92                | 2.64                |                           |                             |
| <b>SEM</b>                  | 1.0                         | 1.0         | 3.03        | 2.19                | 0.83                |                           |                             |
| <b>p-value (v. control)</b> | 0.002                       |             |             | 0.61                | 0.59                | 0.67                      |                             |
| Adolescents (14-20.9)       | 6084                        | 14.2        | 4.0         | n/a                 | 11.60               | 2.48                      |                             |
|                             | 6089                        | 14.3        | 8.0         | 56.80               | 11.15               | 2.79                      |                             |
|                             | 6049                        | 15.0        | 10.0        | 15.80               | 14.78               | 3.00                      |                             |
|                             | 6083                        | 15.2        | 11.0        | 41.75               | 19.27               | 2.23                      |                             |
|                             | 6207                        | 16.0        | 10.0        | 33.2                | 18.38               | 6.18                      |                             |
|                             | 6261                        | 16.0        | 14.2        | n/a                 | 17.60               | 3.69                      |                             |
|                             | 6148                        | 17.1        | 7.0         | 26.36               | 17.45               | 1.86                      |                             |
|                             | 6087                        | 17.5        | 4.0         | 58.40               | 18.43               | 1.96                      |                             |
|                             | 6145                        | 18.0        | 11.0        | 42.19               | 14.15               | 1.46                      |                             |
|                             | 6237                        | 18.0        | 12.0        | 32.51               | 12.27               | 2.28                      |                             |
| 6195                        | 19.2                        | 5.0         | 29.80       | 13.65               | 1.84                |                           |                             |
| 6161                        | 19.2                        | 7.0         | 39.8        | 18.28               | 3.43                |                           |                             |
| 6064                        | 19.6                        | 9.0         | 46.15       | 12.13               | 3.27                |                           |                             |
| 6212                        | 20.0                        | 5.0         | 43.5        | 15.88               | 3.77                |                           |                             |
| <b>Average</b>              | 17.1                        | 8.4         | 38.86       | 15.36               | 2.87                |                           |                             |
| <b>SD</b>                   | 2.00                        | 3.2         | 12.21       | 2.89                | 1.20                |                           |                             |
| <b>SEM</b>                  | 0.53                        | 0.85        | 3.26        | 0.77                | 0.32                |                           |                             |
| <b>p-value (v. control)</b> | 0.97                        |             |             | 1.29E-05            | 0.53                | 0.29                      |                             |
| Young Adults (21-39)        | 6224                        | 21.0        | 1.5         | 56.09               | 7.33                | 3.34                      |                             |
|                             | 6198                        | 22.0        | 3.0         | n/a                 | 5.48                | 21.71                     |                             |
|                             | 6245                        | 22.0        | 7.0         | 31.58               | 15.52               | 3.07                      |                             |
|                             | 6026                        | 22.4        | 14.0        | 67.30               | 15.67               | n/a                       |                             |
|                             | 6070                        | 22.6        | 7.0         | 39.10               | 15.97               | 4.85                      |                             |
|                             | 6069                        | 22.9        | 7.0         | 55.70               | 14.33               | 10.28                     |                             |
|                             | 6025                        | 23.8        | 19.0        | n/a                 | n/a                 | 2.99                      |                             |
|                             | 6247                        | 24.0        | 0.6         | 59.77               | 22.98               | 1.71                      |                             |
|                             | 6211                        | 24.0        | 4.0         | 33.00               | 16.87               | 6.55                      |                             |
|                             | 6196                        | 26.0        | 15.0        | 28.19               | 9.38                | 3.77                      |                             |
| 6041                        | 26.3                        | 23.0        | 32.50       | 15.48               | 3.34                |                           |                             |
| 6039                        | 28.7                        | 12.0        | 42.20       | 22.15               | n/a                 |                           |                             |
| 6088                        | 31.2                        | 5.0         | 32.00       | 17.42               | 0.93                |                           |                             |
| 6081                        | 31.4                        | 15.0        | 62.43       | 18.50               | 7.30                |                           |                             |
| 6035                        | 32.1                        | 28.0        | 42.10       | 11.75               | 6.22                |                           |                             |
| 6054                        | 35.1                        | 30.0        | 29.45       | 26.08               | 1.89                |                           |                             |
| 6038                        | 37.2                        | 20.0        | 39.50       | 19.25               | 5.88                |                           |                             |
| 6031                        | 39.0                        | 35.0        | 40.20       | 20.58               | 0.95                |                           |                             |
| <b>Average</b>              | 27.3                        | 13.7        | 43.19       | 16.16               | 5.30                |                           |                             |
| <b>SD</b>                   | 5.7                         | 10.4        | 12.87       | 5.47                | 5.06                |                           |                             |
| <b>SEM</b>                  | 1.3                         | 2.4         | 3.03        | 1.29                | 1.19                |                           |                             |
| <b>p-value (v. control)</b> | 0.93                        |             |             | 0.0001              | 0.07                | 0.71                      |                             |
| Older Adults (≥40)          | 6150                        | 41.2        | 35.0        | 27.14               | 10.07               | 3.92                      |                             |
|                             | 6135                        | 43.5        | 21.0        | 31.39               | 17.22               | 3.25                      |                             |
|                             | 6036                        | 49.2        | 34.0        | 31.13               | 23.23               | 3.63                      |                             |
|                             | 6138                        | 49.2        | 41.0        | 99.60               | 18.00               | 5.03                      |                             |
|                             | 6040                        | 50.0        | 20.0        | 64.90               | 19.65               | 1.62                      |                             |
|                             | <b>Average</b>              | 46.6        | 30.2        | 50.83               | 17.63               | 3.49                      |                             |
|                             | <b>SD</b>                   | 4.0         | 9.3         | 31.24               | 4.82                | 1.24                      |                             |
|                             | <b>SEM</b>                  | 1.8         | 4.1         | 13.97               | 2.16                | 0.55                      |                             |
|                             | <b>p-value (v. control)</b> | 0.07        |             |                     |                     | 0.07                      | 0.33                        |

SUPPLEMENTARY DATA

**Supplementary Table 16. Individual cytoplasmic Sox9 cell proliferation from non-diabetic and T1D samples.** Ki67+ cytoplasmic Sox9+ cells (number; % total cytoplasmic Sox9; % total Intraislet Ki67+), total cytoplasmic Sox9+ cells (number), total intraislet Ki67+ cells (number).

|                             | nPOD Case #    | Age   | Years with Diabetes | Ki67+ Sox9 <sup>Cyt</sup> + Cells | Total Sox9 <sup>Cyt</sup> + Cells | Total Intraislet Ki67+ Cells | Ki67+ Sox9 <sup>Cyt</sup> + Cells (% Total Sox9 <sup>Cyt</sup> ) | Ki67+ Sox9 <sup>Cyt</sup> + (% Total Intraislet Ki67+) |
|-----------------------------|----------------|-------|---------------------|-----------------------------------|-----------------------------------|------------------------------|------------------------------------------------------------------|--------------------------------------------------------|
| Control                     | 6099           | 14.20 | n/a                 | 2                                 | 1300                              | 6                            | 0.15                                                             | 33.33                                                  |
|                             | 6153           | 15.20 | n/a                 | 22                                | 554                               | 28                           | 3.97                                                             | 78.57                                                  |
|                             | 6075           | 16.00 | n/a                 | 25                                | 780                               | 45                           | 3.21                                                             | 55.56                                                  |
|                             | 6096           | 16.00 | n/a                 | 1                                 | 547                               | 1                            | 0.18                                                             | 100.00                                                 |
|                             | 6098           | 17.80 | n/a                 | 1                                 | 592                               | 1                            | 0.17                                                             | 100.00                                                 |
|                             | 6279           | 19.00 | n/a                 | 212                               | 2047                              | 259                          | 10.36                                                            | 81.85                                                  |
|                             | <b>Average</b> | 16.4  |                     | 44                                | 970                               | 57                           | 3.01                                                             | 74.89                                                  |
|                             | <b>SD</b>      | 1.75  |                     | 83                                | 600                               | 101                          | 3.98                                                             | 26.17                                                  |
|                             | <b>SEM</b>     | 0.71  |                     | 34                                | 245                               | 41                           | 1.62                                                             | 10.68                                                  |
|                             | T1D            | 6052  | 12.0                | 1.0                               | 100                               | 777                          | 122                                                              | 12.87                                                  |
| 6113                        |                | 13.1  | 1.6                 | 17                                | 454                               | 28                           | 3.74                                                             | 60.71                                                  |
| 6084                        |                | 14.2  | 4.0                 | 67                                | 546                               | 90                           | 12.27                                                            | 74.44                                                  |
| 6089                        |                | 14.3  | 8.0                 | 2                                 | 853                               | 13                           | 0.23                                                             | 15.38                                                  |
| 6049                        |                | 15.0  | 10.0                | 2                                 | 345                               | 4                            | 0.58                                                             | 50.00                                                  |
| 6145                        |                | 18.0  | 11.0                | 0                                 | 255                               | 2                            | 0.00                                                             | 0.00                                                   |
| <b>Average</b>              |                | 14.4  | 5.9                 | 31                                | 538                               | 43                           | 4.95                                                             | 47.09                                                  |
| <b>SD</b>                   |                | 2.04  | 4.3                 | 42                                | 237                               | 51                           | 6.06                                                             | 32.81                                                  |
| <b>SEM</b>                  |                | 0.83  | 1.8                 | 17                                | 97                                | 21                           | 2.47                                                             | 13.39                                                  |
| <b>p-value (v. control)</b> |                | 0.11  |                     | 0.75                              | 0.13                              | 0.78                         | 0.53                                                             | 0.14                                                   |

SUPPLEMENTARY DATA

**Supplementary Table 17. Nuclear Sox9 ductal cell proliferation from non-diabetic and T1D samples.** Total ductal cells (number), Ki67+ nuclear Sox9+ ductal cells (number; % total).

|                             | nPOD Case #    | Age  | Years with Diabetes | Ductal Cells | Ki67+ Sox9 <sup>Nuc+</sup> Ductal Cells | Ki67+ Sox9 <sup>Nuc+</sup> Ductal Cells (% Total Duct Cells) |
|-----------------------------|----------------|------|---------------------|--------------|-----------------------------------------|--------------------------------------------------------------|
| Control                     | 6099           | 14.2 | n/a                 | 315          | 0                                       | 0.00                                                         |
|                             | 6153           | 15.2 | n/a                 | 282          | 0                                       | 0.00                                                         |
|                             | 6075           | 16.0 | n/a                 | 331          | 0                                       | 0.00                                                         |
|                             | 6096           | 16.0 | n/a                 | 761          | 0                                       | 0.00                                                         |
|                             | 6098           | 17.8 | n/a                 | 2977         | 5                                       | 0.17                                                         |
|                             | 6279           | 19.0 | n/a                 | 592          | 1                                       | 0.17                                                         |
|                             | <b>Average</b> | 16.4 |                     | 876          | 1                                       | 0.06                                                         |
|                             | <b>SD</b>      | 1.75 |                     | 1046         | 2                                       | 0.09                                                         |
|                             | <b>SEM</b>     | 0.71 |                     | 427          | 1                                       | 0.04                                                         |
| T1D                         | 6052           | 12.0 | 1.0                 | 178          | 0                                       | 0.00                                                         |
|                             | 6113           | 13.1 | 1.6                 | 83           | 0                                       | 0.00                                                         |
|                             | 6084           | 14.2 | 4.0                 | 559          | 0                                       | 0.00                                                         |
|                             | 6049           | 15.0 | 10.0                | 280          | 0                                       | 0.00                                                         |
|                             | 6145           | 18.0 | 11.0                | 197          | 0                                       | 0.00                                                         |
|                             | 6195           | 19.2 | 5.0                 | 179          | 0                                       | 0.00                                                         |
|                             | <b>Average</b> | 15.3 | 5.4                 | 246          | 0                                       | 0.00                                                         |
|                             | <b>SD</b>      | 2.8  | 4.2                 | 166          | 0                                       | 0.00                                                         |
|                             | <b>SEM</b>     | 1.1  | 1.7                 | 68           | 0                                       | 0.00                                                         |
| <b>p-value (v. control)</b> | 0.43           |      | 0.18                | 0.25         | 0.14                                    |                                                              |



SUPPLEMENTARY DATA

**Supplementary Table 18. Sox9<sup>Cyt+</sup> islet endocrine cells from non-diabetic and T1D samples.**  
 Total Syn<sup>+</sup> cells (number), Sox9<sup>Cyt+</sup> cells (number; % of syn+ cells), and Syn<sup>+</sup> Sox9<sup>Cyt+</sup> cells (number; % of Sox9<sup>Cyt+</sup> cells). "n/a" indicates the measurement is not applicable for the case. Cross-hatched boxes indicates that the measurement could not be calculated.

|         | nPOD Case #                 | Age (Years) | Years with Diabetes | Syn+ Cells | Sox9 <sup>Cyt+</sup> Cells | Syn+ Sox9 <sup>Cyt+</sup> Cells | Syn+ Sox9 <sup>Cyt+</sup> Cells (% Sox9 <sup>Cyt+</sup> Cells) | Sox9 <sup>Cyt+</sup> Cells (% Syn+ Cells) |
|---------|-----------------------------|-------------|---------------------|------------|----------------------------|---------------------------------|----------------------------------------------------------------|-------------------------------------------|
| Control | 6048                        | 30.0        | n/a                 | 8707       | 671                        | 669                             | 99.70                                                          | 7.71                                      |
|         | 6030                        | 30.1        | n/a                 | 8033       | 402                        | 402                             | 100.00                                                         | 5.00                                      |
|         | 6002                        | 39.0        | n/a                 | 4805       | 358                        | 358                             | 100.00                                                         | 7.45                                      |
|         | <b>Average</b>              | 33.0        |                     | 7182       | 477                        | 476                             | 99.90                                                          | 6.72                                      |
|         | <b>SD</b>                   | 5.2         |                     | 2086       | 169                        | 168                             | 0.17                                                           | 1.49                                      |
|         | <b>SEM</b>                  | 3.0         |                     | 1204       | 98                         | 97                              | 0.10                                                           | 0.86                                      |
| T1D     | 6212                        | 20.0        | 5.0                 | 6873       | 1106                       | 1100                            | 99.46                                                          | 16.09                                     |
|         | 6025                        | 23.8        | 19.0                | 2689       | 299                        | 298                             | 99.67                                                          | 11.12                                     |
|         | 6211                        | 24.0        | 4.0                 | 6515       | 987                        | 984                             | 99.70                                                          | 15.15                                     |
|         | <b>Average</b>              | 22.6        | 9.3                 | 5359       | 797                        | 794                             | 99.61                                                          | 14.12                                     |
|         | <b>SD</b>                   | 2.3         | 8.4                 | 2319       | 436                        | 433                             | 0.13                                                           | 2.64                                      |
|         | <b>SEM</b>                  | 1.3         | 4.8                 | 1339       | 252                        | 250                             | 0.07                                                           | 1.52                                      |
|         | <b>p-value (v. control)</b> | 0.03        |                     | 0.37       | 0.30                       | 0.30                            | 0.08                                                           | 0.013                                     |

SUPPLEMENTARY DATA

**Supplementary Table 19. Sox9<sup>Cyt</sup> ARX co-positive cells from non-diabetic and T1D samples.** Total ARX+ cells, Sox9<sup>Cyt</sup>+ cells (number; % of ARX+ cells), Sox9<sup>Cyt</sup>+ ARX+ cells (number; % of Sox9<sup>Cyt</sup>+ cells). "n/a" indicates the measurement is not applicable for the case. Cross-hatched boxes indicates that the measurement could not be calculated.

|         | nPOD Case #                 | Age (Years) | Years with Diabetes | ARX+ Cells | Sox9 <sup>Cyt</sup> + Cells | Sox9 <sup>Cyt</sup> + ARX+ Cells | Sox9 <sup>Cyt</sup> +ARX+ Cells (% of Sox9 <sup>Cyt</sup> + Cells) | Sox9 <sup>Cyt</sup> + Cells (% of ARX+ Cells) |
|---------|-----------------------------|-------------|---------------------|------------|-----------------------------|----------------------------------|--------------------------------------------------------------------|-----------------------------------------------|
| Control | 6238                        | 20          | n/a                 | 4250       | 899                         | 884                              | 98.33                                                              | 21.15                                         |
|         | 6029                        | 24          | n/a                 | 1985       | 736                         | 735                              | 99.86                                                              | 37.08                                         |
|         | 6229                        | 31          | n/a                 | 6434       | 1775                        | 1772                             | 99.83                                                              | 27.59                                         |
|         | <b>Average</b>              | 25          |                     | 4223       | 1137                        | 1130                             | 99.34                                                              | 28.61                                         |
|         | <b>SD</b>                   | 5.6         |                     | 2225       | 559                         | 561                              | 0.88                                                               | 8.01                                          |
|         | <b>SEM</b>                  | 3.2         |                     | 1284       | 323                         | 324                              | 0.51                                                               | 4.63                                          |
| T1D     | 6212                        | 20.0        | 5.0                 | 4045       | 1106                        | 1089                             | 98.46                                                              | 27.34                                         |
|         | 6025                        | 23.8        | 19.0                | 1567       | 299                         | 296                              | 99.00                                                              | 19.08                                         |
|         | 6211                        | 24.0        | 4.0                 | 4544       | 987                         | 966                              | 97.87                                                              | 21.72                                         |
|         | <b>Average</b>              | 22.6        | 9.3                 | 3385       | 797                         | 784                              | 98.44                                                              | 22.71                                         |
|         | <b>SD</b>                   | 2.3         | 8.4                 | 1594       | 436                         | 427                              | 0.56                                                               | 4.22                                          |
|         | <b>SEM</b>                  | 1.3         | 4.8                 | 921        | 252                         | 246                              | 0.32                                                               | 2.44                                          |
|         | <b>p-value (v. control)</b> | 0.53        |                     | 0.62       | 0.45                        | 0.44                             | 0.21                                                               | 0.32                                          |

SUPPLEMENTARY DATA

**Supplementary Table 20. Proliferating ARX+ glucagon negative cells from non-diabetic and T1D samples.** Total ARX+ Gcg- (number), Ki67+ ARX+ Gcg- Cells (number; % of ARX+ Gcg- cells). "n/a" indicates the measurement is not applicable for the case. Cross-hatched boxes indicates that the measurement could not be calculated.

|         | nPOD Case #                 | Age (Years) | Years with Diabetes | ARX+ Gcg- Cells | Ki67+ ARX+ Gcg- Cells | Ki67+ ARX+ Gcg- Cells (% of ARX+ Gcg- Cells) |
|---------|-----------------------------|-------------|---------------------|-----------------|-----------------------|----------------------------------------------|
| Control | 6075                        | 16.0        | n/a                 | 419             | 7                     | 1.67                                         |
|         | 6131                        | 24.2        | n/a                 | 4255            | 23                    | 0.54                                         |
|         | 6235                        | 30.0        | n/a                 | 690             | 96                    | 13.91                                        |
|         | <b>Average</b>              | 23.4        |                     | 1788            | 42                    | 5.37                                         |
|         | <b>SD</b>                   | 7.0         |                     | 2141            | 47                    | 7.42                                         |
|         | <b>SEM</b>                  | 4.1         |                     | 1236            | 27                    | 4.28                                         |
| T1D     | 6113                        | 13.1        | 1.6                 | 373             | 18                    | 4.83                                         |
|         | 6084                        | 14.2        | 4.0                 | 350             | 37                    | 10.57                                        |
|         | 6261                        | 16.0        | 14.2                | 444             | 159                   | 35.81                                        |
|         | <b>Average</b>              | 14.4        | 6.6                 | 389             | 71                    | 17.07                                        |
|         | <b>SD</b>                   | 1.5         | 6.7                 | 49              | 77                    | 16.48                                        |
|         | <b>SEM</b>                  | 0.8         | 3.9                 | 28              | 44                    | 9.52                                         |
|         | <b>p-value (v. control)</b> | 0.10        |                     | 0.32            | 0.60                  | 0.33                                         |

SUPPLEMENTARY DATA

**Supplementary Table 21. Adolescent synaptophysin cell death.** TUNEL+ synaptophysin (Syn+) cell proliferation (number; % total), total islet endocrine cell (number).

|                | nPOD Case #                 | Age (Years)    | Years with Diabetes | TUNEL+ Syn+ Cells | Total Syn+ Cells | TUNEL+ Syn+ Cell Death (% Total) |      |
|----------------|-----------------------------|----------------|---------------------|-------------------|------------------|----------------------------------|------|
| <b>Control</b> | 6117                        | 0.33           | n/a                 | 0                 | 6264             | 0.00                             |      |
|                | 6115                        | 0.42           | n/a                 | 0                 | 5797             | 0.00                             |      |
|                | 6092                        | 0.50           | n/a                 | 0                 | 3262             | 0.00                             |      |
|                | 6103                        | 1.5            | n/a                 | 0                 | 4985             | 0.00                             |      |
|                | 6107                        | 2.2            | n/a                 | 9                 | 14539            | 0.06                             |      |
|                | 6094                        | 2.9            | n/a                 | 0                 | 4968             | 0.00                             |      |
|                | 6106                        | 2.9            | n/a                 | 0                 | 10431            | 0.00                             |      |
|                | 6112                        | 6.3            | n/a                 | 2                 | 7905             | 0.03                             |      |
|                | 6099                        | 14.2           | n/a                 | 0                 | 15220            | 0.00                             |      |
|                | 6096                        | 16.0           | n/a                 | 0                 | 4509             | 0.00                             |      |
|                | 6098                        | 17.8           | n/a                 | 0                 | 10413            | 0.00                             |      |
|                | 6253                        | 19.0           | n/a                 | 19                | 12328            | 0.15                             |      |
|                | 6057                        | 22.0           | n/a                 | 6                 | 6706             | 0.09                             |      |
|                | 6235                        | 30.0           | n/a                 | 18                | 19782            | 0.09                             |      |
|                | 6030                        | 30.1           | n/a                 | 4                 | 8441             | 0.05                             |      |
|                | 6015                        | 39.0           | n/a                 | 0                 | 7650             | 0.00                             |      |
|                | 6010                        | 47.0           | n/a                 | 0                 | 5815             | 0.00                             |      |
|                | 6008                        | 50.0           | n/a                 | 0                 | 5959             | 0.00                             |      |
|                | <b>Average</b>              | 16.8           |                     | 3                 | 8610             | 0.03                             |      |
|                | <b>SD</b>                   | 16.5           |                     | 6                 | 4401             | 0.05                             |      |
|                | <b>SEM</b>                  | 3.9            |                     | 1                 | 1037             | 0.01                             |      |
| <b>T1D</b>     | 6063                        | 4.4            | 3.0                 | 0                 | 9560             | 0.00                             |      |
|                | 6062                        | 10.7           | 6.0                 | 0                 | 3880             | 0.00                             |      |
|                | 6052                        | 12.0           | 1.0                 | 1                 | 9380             | 0.01                             |      |
|                | 6084                        | 14.2           | 4.0                 | 2                 | 9236             | 0.02                             |      |
|                | 6089                        | 14.3           | 8.0                 | 1                 | 3105             | 0.03                             |      |
|                | 6087                        | 17.5           | 4.0                 | 0                 | 2590             | 0.00                             |      |
|                | 6064                        | 19.6           | 9.0                 | 0                 | 11240            | 0.00                             |      |
|                | 6026                        | 22.4           | 14.0                | 0                 | 1907             | 0.00                             |      |
|                | 6070                        | 22.6           | 7.0                 | 0                 | 21220            | 0.00                             |      |
|                | 6069                        | 22.9           | 7.0                 | 0                 | 11390            | 0.00                             |      |
|                | 6081                        | 31.4           | 15.0                | 0                 | 2258             | 0.00                             |      |
|                |                             | <b>Average</b> | 17.5                | 7.1               | 0                | 7797                             | 0.01 |
|                |                             | <b>SD</b>      | 7.4                 | 4.3               | 1                | 5852                             | 0.01 |
|                | <b>SEM</b>                  | 2.2            | 1.3                 | 0                 | 1764             | 0.00                             |      |
|                | <b>p-value (v. control)</b> | 0.90           |                     | 0.14              | 0.67             | 0.16                             |      |



SUPPLEMENTARY DATA

**Supplementary Table 22. TUNEL+ Sox9<sup>Cyt+</sup> Analysis.** Total Sox9<sup>Cyt+</sup> cells (number), islets (number), TUNEL+ Sox9<sup>Cyt+</sup> cells (number per islet), and islet endocrine proliferation as measured by Ki67+ Syn+ cells (% total).

| nPOD Case #    | Age (Years) | TUNEL+ Sox9+ cells | Islets (#) | TUNEL+ Sox9 <sup>Cyt+</sup> cells (# per Islet) | Ki67+ Syn+ (% Total Syn+) |
|----------------|-------------|--------------------|------------|-------------------------------------------------|---------------------------|
| 6099           | 14.2        | 0                  | 199        | 0.000                                           | 0.060                     |
| 6096           | 16.0        | 0                  | 134        | 0.000                                           | 0.150                     |
| 6098           | 17.8        | 0                  | 267        | 0.000                                           | 0.050                     |
| 6253           | 19.0        | 0                  | 126        | 0.000                                           | 0.280                     |
| 6235           | 30.0        | 0                  | 185        | 0.000                                           | 1.400                     |
| 6030           | 30.1        | 0                  | 82         | 0.000                                           | 0.590                     |
| <b>Average</b> | 21.2        | 0                  | 166        | 0.000                                           | 0.422                     |
| <b>SD</b>      | 7.1         | 0                  | 65         | 0.000                                           | 0.519                     |
| <b>SEM</b>     | 2.9         | 0                  | 26.7       | 0.000                                           | 0.212                     |

SUPPLEMENTARY DATA

**Supplementary Table 23 Control and T1D Islet Cell Area & Mass.** Pancreas weight (g), islet endocrine cell area (% total), and islet endocrine cell mass (g). "n/a" indicates pancreas weight was not measured for that case. Cross-hatched boxes indicates that the measurement could not be calculated.

|                       |                             | Control                     |             |                     |                                |                          | T1D         |             |                     |                     |                                |                          |  |
|-----------------------|-----------------------------|-----------------------------|-------------|---------------------|--------------------------------|--------------------------|-------------|-------------|---------------------|---------------------|--------------------------------|--------------------------|--|
|                       |                             | nPOD Case #                 | Age (Years) | Pancreas Weight (g) | Islet Endocrine Area (% Total) | Islet Endocrine Mass (g) | nPOD Case # | Age (Years) | Years with Diabetes | Pancreas Weight (g) | Islet Endocrine Area (% Total) | Islet Endocrine Mass (g) |  |
| Adolescents (14-20.9) |                             | 6232                        | 14.0        | 49.40               | 2.17                           | 1.070                    |             |             |                     |                     |                                |                          |  |
|                       |                             | 6233                        | 14.0        | 60.93               | 2.72                           | 1.658                    |             |             |                     |                     |                                |                          |  |
|                       |                             | 6099                        | 14.2        | 85.56               | 3.52                           | 3.009                    |             |             |                     |                     |                                |                          |  |
|                       |                             | 6153                        | 15.2        | 67.75               | 2.37                           | 1.607                    |             |             |                     |                     |                                |                          |  |
|                       |                             | 6075                        | 16.0        | 47.29               | 1.46                           | 0.690                    |             |             |                     |                     |                                |                          |  |
|                       |                             | 6096                        | 16.0        | 51.50               | 1.85                           | 0.955                    |             |             |                     |                     |                                |                          |  |
|                       |                             | 6230                        | 16.0        | 66.27               | 2.12                           | 1.404                    |             |             |                     |                     |                                |                          |  |
|                       |                             | 6227                        | 17.0        | 60.40               | 1.50                           | 0.906                    |             |             |                     |                     |                                |                          |  |
|                       |                             | 6271                        | 17.0        | 97.99               | 1.11                           | 1.090                    |             |             |                     |                     |                                |                          |  |
|                       |                             | 6098                        | 17.8        | 91.10               | 3.03                           | 2.756                    |             |             |                     |                     |                                |                          |  |
|                       |                             | 6253                        | 19.0        | 85.29               | 1.34                           | 1.139                    |             |             |                     |                     |                                |                          |  |
|                       |                             | 6279                        | 19.0        | 80.17               | 1.21                           | 0.970                    |             |             |                     |                     |                                |                          |  |
|                       |                             | 6234                        | 20.0        | 19.66               | 3.06                           | 0.607                    |             |             |                     |                     |                                |                          |  |
|                       |                             | 6238                        | 20.0        | 91.50               | 2.58                           | 2.357                    |             |             |                     |                     |                                |                          |  |
|                       |                             | 6174                        | 20.8        | 79.30               | 1.50                           | 1.192                    |             |             |                     |                     |                                |                          |  |
|                       |                             | <b>Average</b>              | 17.1        | 68.95               | 2.10                           | 1.427                    |             |             |                     |                     |                                |                          |  |
|                       |                             | <b>SD</b>                   | 2.28        | 21.26               | 0.76                           | 0.733                    |             |             |                     |                     |                                |                          |  |
|                       | <b>SEM</b>                  | 0.59                        | 5.49        | 0.20                | 0.189                          |                          |             |             |                     |                     |                                |                          |  |
| Young Adults (21-39)  |                             | 6024                        | 21.0        | n/a                 | 2.17                           |                          |             |             |                     |                     |                                |                          |  |
|                       |                             | 6179                        | 21.8        | 72.40               | 1.02                           | 0.736                    |             |             |                     |                     |                                |                          |  |
|                       |                             | 6001                        | 22.0        | n/a                 | 2.50                           |                          |             |             |                     |                     |                                |                          |  |
|                       |                             | 6057                        | 22.0        | 104.36              | 2.38                           | 2.485                    |             |             |                     |                     |                                |                          |  |
|                       |                             | 6162                        | 22.7        | 81.50               | 1.00                           | 0.818                    |             |             |                     |                     |                                |                          |  |
|                       |                             | 6003                        | 23.0        | n/a                 | 2.42                           |                          |             |             |                     |                     |                                |                          |  |
|                       |                             | 6029                        | 24.0        | 79.30               | 1.42                           | 1.127                    |             |             |                     |                     |                                |                          |  |
|                       |                             | 6131                        | 24.2        | 108.92              | 1.99                           | 2.166                    |             |             |                     |                     |                                |                          |  |
|                       |                             | 6053                        | 25.0        | n/a                 | 1.21                           |                          |             |             |                     |                     |                                |                          |  |
|                       |                             | 6126                        | 25.2        | 80.20               | 1.14                           | 0.911                    |             |             |                     |                     |                                |                          |  |
|                       |                             | 6058                        | 27.0        | 52.68               | 2.31                           | 1.219                    |             |             |                     |                     |                                |                          |  |
|                       |                             | 6048                        | 30.0        | 139.00              | 1.21                           | 1.680                    |             |             |                     |                     |                                |                          |  |
|                       |                             | 6235                        | 30.0        | 102.31              | 1.64                           | 1.677                    |             |             |                     |                     |                                |                          |  |
|                       |                             | 6030                        | 30.1        | 96.30               | 1.32                           | 1.271                    |             |             |                     |                     |                                |                          |  |
|                       |                             | 6229                        | 31.0        | 45.60               | 2.34                           | 1.065                    |             |             |                     |                     |                                |                          |  |
|                       |                             | 6034                        | 32.0        | 75.40               | 1.89                           | 1.428                    |             |             |                     |                     |                                |                          |  |
|                       |                             | 6004                        | 33.0        | n/a                 | 1.60                           |                          |             |             |                     |                     |                                |                          |  |
|                       | 6002                        | 39.0                        | n/a         | 2.01                |                                |                          |             |             |                     |                     |                                |                          |  |
|                       | 6015                        | 39.0                        | n/a         | 2.02                |                                |                          |             |             |                     |                     |                                |                          |  |
|                       | <b>Average</b>              | 27.5                        | 66.50       | 1.77                | 1.36                           |                          |             |             |                     |                     |                                |                          |  |
|                       | <b>SD</b>                   | 5.6                         | 25.55       | 0.52                | 0.537                          |                          |             |             |                     |                     |                                |                          |  |
|                       | <b>SEM</b>                  | 1.3                         | 5.86        | 0.12                | 0.15                           |                          |             |             |                     |                     |                                |                          |  |
| Older Adults (≥40)    |                             | 6009                        | 45.0        | n/a                 | 1.99                           |                          |             |             |                     |                     |                                |                          |  |
|                       |                             | 6011                        | 46.0        | n/a                 | 1.59                           |                          |             |             |                     |                     |                                |                          |  |
|                       |                             | 6010                        | 47.0        | n/a                 | 2.41                           |                          |             |             |                     |                     |                                |                          |  |
|                       |                             | 6008                        | 50.0        | n/a                 | 0.96                           |                          |             |             |                     |                     |                                |                          |  |
|                       |                             | 6168                        | 51.0        | 88.76               | 1.30                           | 1.158                    |             |             |                     |                     |                                |                          |  |
|                       |                             | 6017                        | 59.0        | n/a                 | 1.78                           |                          |             |             |                     |                     |                                |                          |  |
|                       |                             | 6020                        | 60.0        | n/a                 | 2.88                           |                          |             |             |                     |                     |                                |                          |  |
|                       |                             | 6016                        | 64.0        | n/a                 | 2.47                           |                          |             |             |                     |                     |                                |                          |  |
|                       |                             | 6013                        | 65.0        | n/a                 | 1.90                           |                          |             |             |                     |                     |                                |                          |  |
|                       |                             | <b>Average</b>              | 54.1        | 88.76               | 1.92                           | 1.158                    |             |             |                     |                     |                                |                          |  |
|                       |                             | <b>SD</b>                   | 7.9         |                     | 0.60                           |                          |             |             |                     |                     |                                |                          |  |
|                       |                             | <b>SEM</b>                  | 2.6         |                     |                                |                          |             |             |                     |                     |                                |                          |  |
|                       | Adolescents (14-20.9)       |                             | 6084        | 14.2                |                                |                          |             |             |                     | n/a                 | 0.95                           |                          |  |
|                       |                             |                             | 6089        | 14.3                | 8.0                            | 56.80                    | 0.37        | 0.211       |                     |                     |                                |                          |  |
|                       |                             |                             | 6049        | 15.0                | 10.0                           | 15.80                    | 1.98        | 0.312       |                     |                     |                                |                          |  |
|                       |                             |                             | 6083        | 15.2                | 11.0                           | 41.78                    | 1.39        | 0.580       |                     |                     |                                |                          |  |
|                       |                             |                             | 6207        | 16.0                | 10.0                           | 33.20                    | 0.42        | 0.141       |                     |                     |                                |                          |  |
|                       |                             | 6261                        | 16.0        | 14.2                | n/a                            | 3.81                     |             |             |                     |                     |                                |                          |  |
|                       |                             | 6148                        | 17.1        | 7.0                 | 26.36                          | 0.40                     | 0.104       |             |                     |                     |                                |                          |  |
|                       |                             | 6087                        | 17.5        | 4.0                 | 58.40                          | 0.43                     | 0.254       |             |                     |                     |                                |                          |  |
|                       |                             | 6145                        | 18.0        | 11.0                | 42.19                          | 1.00                     | 0.422       |             |                     |                     |                                |                          |  |
|                       |                             | 6237                        | 18.0        | 12.0                | 32.51                          | 1.17                     | 0.381       |             |                     |                     |                                |                          |  |
|                       |                             | 6195                        | 19.2        | 5.0                 | 29.80                          | 0.59                     | 0.175       |             |                     |                     |                                |                          |  |
|                       |                             | 6161                        | 19.2        | 7.0                 | 39.80                          | 0.70                     | 0.277       |             |                     |                     |                                |                          |  |
|                       |                             | 6064                        | 19.6        | 9.0                 | 46.15                          | 1.15                     | 0.532       |             |                     |                     |                                |                          |  |
|                       |                             | 6212                        | 20.0        | 5.0                 | 43.50                          | 1.22                     | 0.533       |             |                     |                     |                                |                          |  |
|                       |                             | <b>Average</b>              | 17.1        | 8.4                 | 38.86                          | 1.11                     | 0.327       |             |                     |                     |                                |                          |  |
|                       |                             | <b>SD</b>                   | 2.00        | 3.18                | 12.22                          | 0.90                     | 0.162       |             |                     |                     |                                |                          |  |
|                       |                             | <b>SEM</b>                  | 0.53        | 0.85                | 3.26                           | 0.24                     | 0.047       |             |                     |                     |                                |                          |  |
|                       | <b>p-value (v. control)</b> | 0.9741                      |             | 0.0000              | 0.3119                         | 0.0000                   |             |             |                     |                     |                                |                          |  |
| Young Adults (21-39)  |                             | 6224                        | 21.0        | 1.5                 | 56.09                          | 0.33                     | 0.182       |             |                     |                     |                                |                          |  |
|                       |                             | 6198                        | 22.0        | 3.0                 | n/a                            | 0.39                     |             |             |                     |                     |                                |                          |  |
|                       |                             | 6245                        | 22.0        | 7.0                 | 31.58                          | 2.27                     | 0.718       |             |                     |                     |                                |                          |  |
|                       |                             | 6026                        | 22.4        | 14.0                | 67.30                          | 1.31                     | 0.885       |             |                     |                     |                                |                          |  |
|                       |                             | 6070                        | 22.6        | 7.0                 | 39.10                          | 0.62                     | 0.243       |             |                     |                     |                                |                          |  |
|                       |                             | 6069                        | 22.9        | 7.0                 | 55.70                          | 3.11                     | 1.734       |             |                     |                     |                                |                          |  |
|                       |                             | 6025                        | 23.8        | 19.0                | n/a                            | 0.65                     |             |             |                     |                     |                                |                          |  |
|                       |                             | 6247                        | 24.0        | 0.6                 | 59.77                          | 0.60                     | 0.357       |             |                     |                     |                                |                          |  |
|                       |                             | 6211                        | 24.0        | 4.0                 | 33.00                          | 0.77                     | 0.253       |             |                     |                     |                                |                          |  |
|                       |                             | 6196                        | 26.0        | 15.0                | 28.19                          | 1.00                     | 0.282       |             |                     |                     |                                |                          |  |
|                       |                             | 6041                        | 26.3        | 23.0                | 32.50                          | 0.83                     | 0.270       |             |                     |                     |                                |                          |  |
|                       |                             | 6039                        | 28.7        | 12.0                | 42.20                          | 1.69                     | 0.713       |             |                     |                     |                                |                          |  |
|                       |                             | 6088                        | 31.2        | 5.0                 | 32.00                          | 1.37                     | 0.439       |             |                     |                     |                                |                          |  |
|                       |                             | 6081                        | 31.4        | 15.0                | 62.43                          | 0.59                     | 0.369       |             |                     |                     |                                |                          |  |
|                       |                             | 6035                        | 32.1        | 28.0                | 42.10                          | 1.66                     | 0.701       |             |                     |                     |                                |                          |  |
|                       |                             | 6054                        | 35.1        | 30.0                | 29.45                          | 1.09                     | 0.321       |             |                     |                     |                                |                          |  |
|                       |                             | 6038                        | 37.2        | 20.0                | 39.50                          | 1.14                     | 0.451       |             |                     |                     |                                |                          |  |
|                       | 6031                        | 39.0                        | 35.0        | 40.20               | 0.966                          | 0.388                    |             |             |                     |                     |                                |                          |  |
|                       | <b>Average</b>              | 27.3                        | 13.7        | 43.19               | 1.13                           | 0.519                    |             |             |                     |                     |                                |                          |  |
|                       | <b>SD</b>                   | 5.7                         | 10.4        | 12.87               | 0.71                           | 0.384                    |             |             |                     |                     |                                |                          |  |
|                       | <b>SEM</b>                  | 1.3                         | 2.4         | 3.03                | 0.17                           | 0.096                    |             |             |                     |                     |                                |                          |  |
|                       | <b>p-value (v. control)</b> | 0.9330                      |             | 0.0000              | 0.3083                         | 0.0000                   |             |             |                     |                     |                                |                          |  |
| Older Adults (≥40)    |                             | 6036                        | 19.2        | 34.0                | 31.13                          | 0.92                     | 0.285       |             |                     |                     |                                |                          |  |
|                       |                             | 6150                        | 41.2        | 35.0                | 27.14                          | 0.37                     | 0.100       |             |                     |                     |                                |                          |  |
|                       |                             | 6135                        | 43.5        | 21.0                | 31.39                          | 2.21                     | 0.695       |             |                     |                     |                                |                          |  |
|                       |                             | 6138                        | 49.2        | 41.0                | 99.66                          | 0.40                     | 0.403       |             |                     |                     |                                |                          |  |
|                       |                             | 6040                        | 50.0        | 20.0                | 64.90                          | 0.61                     | 0.396       |             |                     |                     |                                |                          |  |
|                       |                             | <b>Average</b>              | 40.6        | 30.2                | 50.84                          | 0.90                     | 0.376       |             |                     |                     |                                |                          |  |
|                       |                             | <b>SD</b>                   | 12.5        | 9.3                 | 31.26                          | 0.76                     | 0.216       |             |                     |                     |                                |                          |  |
|                       |                             | <b>SEM</b>                  | 5.6         | 4.1                 | 13.98                          | 0.34                     | 0.097       |             |                     |                     |                                |                          |  |
|                       |                             | <b>p-value (v. control)</b> | 0.0283      |                     |                                |                          |             |             |                     |                     |                                |                          |  |
